# Supplementary material
Source: Royal Society of Chemistry journal article supplement (doi:10.1039/d6ew00153j)
Supplement: d6ew00153j1.pdf [file d6ew00153j1.pdf]

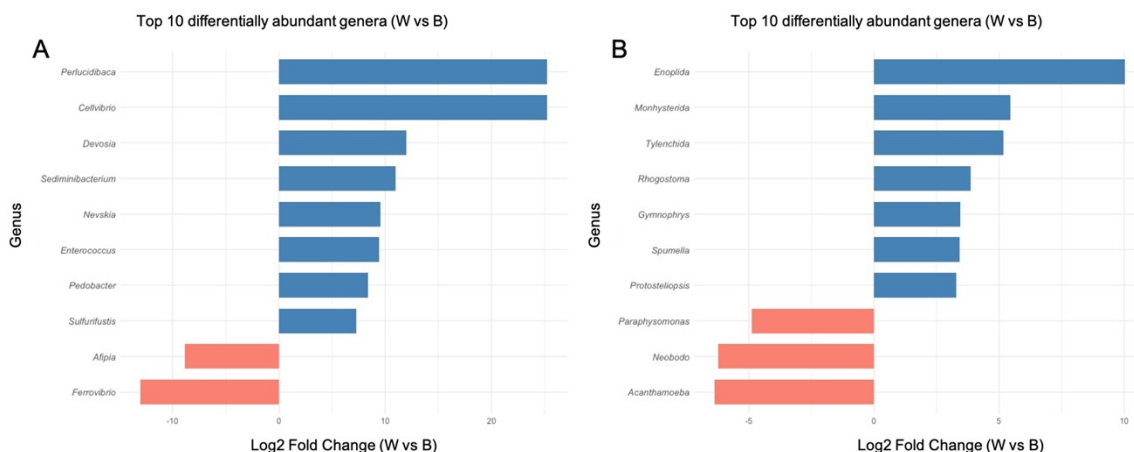

**Supplementary Fig. 1** Differential abundance analysis using DESeq2. Log<sub>2</sub> fold-change values were used to identify taxonomic enrichment trends between sample types. Samples were grouped according to their matrix (water vs. biofilm). A, prokaryotic genera. B, eukaryotic genera. W, water. B, biofilm.
