# Supplementary material
Source: Royal Society of Chemistry journal article supplement (doi:10.1039/d6ew00153j)
Supplement: d6ew00153j2.pdf [file d6ew00153j2.pdf]

Phylum\_to\_Species\_all16SV1

| ASV | Abundance | Sample              | Phylum | Family            | Genus                      | Species                  |              |
|-----|-----------|---------------------|--------|-------------------|----------------------------|--------------------------|--------------|
| 1   | ASV1      | 0.980740809341344   | 3B_8   | Proteobacteria    | Rhizobiales Incertae Sedis | Phreatobacter            | NA           |
| 2   | ASV1      | 0.598586219801239   | 3B_11  | Proteobacteria    | Rhizobiales Incertae Sedis | Phreatobacter            | NA           |
| 3   | ASV1      | 0.588399273965089   | 3W_8   | Proteobacteria    | Rhizobiales Incertae Sedis | Phreatobacter            | NA           |
| 4   | ASV2      | 0.204783179679406   | 3W_11  | Proteobacteria    | Solimonadaceae             | Polycyclovorans          | NA           |
| 5   | ASV5      | 0.0985986943324047  | 3B_11  | Proteobacteria    | Reyraneliaceae             | Reyranela                | NA           |
| 6   | ASV4      | 0.0795726345907006  | 3W_8   | Proteobacteria    | Caulobacteraceae           | Caulobacter              | NA           |
| 7   | ASV7      | 0.0703854630130151  | 3B_11  | Cyanobacteria     | Obscuribacteraceae         | Candidatus Obscuribacter | NA           |
| 8   | ASV6      | 0.0678339393048385  | 3W_8   | Proteobacteria    | Caulobacteraceae           | Phenylobacterium         | NA           |
| 9   | ASV9      | 0.0512667374992576  | 3W_11  | Proteobacteria    | Moraxellaceae              | Perlucidibaca            | NA           |
| 10  | ASV4      | 0.0492078672709884  | 3B_11  | Proteobacteria    | Caulobacteraceae           | Caulobacter              | NA           |
| 11  | ASV11     | 0.0470794754868641  | 3W_11  | Proteobacteria    | Cellvibrionaceae           | Cellvibrio               | NA           |
| 12  | ASV26     | 0.0438986082055817  | 3W_11  | Proteobacteria    | Devosiaceae                | Devosia                  | NA           |
| 13  | ASV1      | 0.0406946433403066  | 3W_11  | Proteobacteria    | Rhizobiales Incertae Sedis | Phreatobacter            | NA           |
| 14  | ASV4      | 0.0338115633104777  | 3W_11  | Proteobacteria    | Caulobacteraceae           | Caulobacter              | NA           |
| 15  | ASV13     | 0.0312609301067108  | 3W_11  | Actinobacteriota  | Nocardiodaceae             | Aeromicrobium            | alkaliterrae |
| 16  | ASV10     | 0.0304711214603518  | 3B_11  | Proteobacteria    | Hyphomicrobiaceae          | Hyphomicrobium           | NA           |
| 17  | ASV12     | 0.0297001430582807  | 3W_8   | Bacteroidota      | Chitinophagaceae           | Terrimonas               | NA           |
| 18  | ASV19     | 0.0264376897168281  | 3B_11  | Proteobacteria    | Xanthobacteraceae          | Afipia                   | NA           |
| 19  | ASV10     | 0.0242577084664492  | 3W_8   | Proteobacteria    | Hyphomicrobiaceae          | Hyphomicrobium           | NA           |
| 20  | ASV18     | 0.0232823646646561  | 3W_11  | Bacteroidota      | Sphingobacteriaceae        | Pedobacter               | bauzanensis  |
| 21  | ASV15     | 0.0223238771621308  | 3W_8   | Proteobacteria    | Sphingomonadaceae          | Sphingobium              | NA           |
| 22  | ASV5      | 0.0220270170934855  | 3W_8   | Proteobacteria    | Reyraneliaceae             | Reyranela                | NA           |
| 23  | ASV21     | 0.0214345579452389  | 3W_11  | Proteobacteria    | Burkholderiaceae           | Limnobacter              | thiooxidans  |
| 24  | ASV17     | 0.0201214581766572  | 3W_8   | Bacteroidota      | Chitinophagaceae           | Sediminibacterium        | salmonium    |
| 25  | ASV20     | 0.0174435527464759  | 3B_11  | Proteobacteria    | Xanthobacteraceae          | Bradyrhizobium           | NA           |
| 26  | ASV25     | 0.0171417069774502  | 3W_11  | Proteobacteria    | Solimonadaceae             | Solimonas                | NA           |
| 27  | ASV16     | 0.0157392381157019  | 3W_8   | Proteobacteria    | Comamonadaceae             | Limnohabitans            | NA           |
| 28  | ASV40     | 0.0145052827474246  | 3W_11  | Proteobacteria    | Moraxellaceae              | Paraperlucidibaca        | NA           |
| 29  | ASV28     | 0.0140499303772825  | 3W_11  | Bacteroidota      | Weeksellaceae              | Chryseobacterium         | NA           |
| 30  | ASV36     | 0.0139631585512911  | 3B_11  | Proteobacteria    | Sphingomonadaceae          | Novosphingobium          | NA           |
| 31  | ASV34     | 0.0131980539731382  | 3B_11  | Proteobacteria    | Acetobacteraceae           | Roseococcus              | NA           |
| 32  | ASV23     | 0.0120503971059088  | 3B_11  | Proteobacteria    | Sphingomonadaceae          | Sphingopyxis             | NA           |
| 33  | ASV32     | 0.011964548508226   | 3W_11  | Proteobacteria    | Comamonadaceae             | Inhella                  | NA           |
| 34  | ASV23     | 0.0118952557562479  | 3W_11  | Proteobacteria    | Sphingomonadaceae          | Sphingopyxis             | NA           |
| 35  | ASV35     | 0.0114017214853008  | 3B_11  | Actinobacteriota  | Mycobacteriaceae           | Mycobacterium            | NA           |
| 36  | ASV24     | 0.0111138755223324  | 3W_8   | Proteobacteria    | Xanthomonadaceae           | Pseudoxanthomonas        | mexicana     |
| 37  | ASV117    | 0.0110538437679419  | 3W_11  | Bacteroidota      | Flavobacteriaceae          | Flavobacterium           | NA           |
| 38  | ASV22     | 0.010058630296478   | 3B_11  | Proteobacteria    | Sphingomonadaceae          | Plot4-2H12               | NA           |
| 39  | ASV38     | 0.00931162600391999 | 3W_11  | Actinobacteriota  | Nocardiodaceae             | Aeromicrobium            | ponti        |
| 40  | ASV73     | 0.00909054912856115 | 3W_11  | Proteobacteria    | Sphingomonadaceae          | Sphingomonas             | NA           |
| 41  | ASV33     | 0.00908724947370505 | 3W_11  | Proteobacteria    | Comamonadaceae             | Rhizobacter              | NA           |
| 42  | ASV99     | 0.00899155948287809 | 3W_11  | Proteobacteria    | Pseudomonadaceae           | Pseudomonas              | NA           |
| 43  | ASV7      | 0.00866831400444442 | 3W_8   | Cyanobacteria     | Obscuribacteraceae         | Candidatus Obscuribacter | NA           |
| 44  | ASV49     | 0.00844381677676515 | 3W_11  | Verrucomicrobiota | Opitutaceae                | Opitutus                 | NA           |
| 45  | ASV41     | 0.00823009199834889 | 3W_8   | Proteobacteria    | Acidiferrobacteraceae      | Sulfurifustis            | NA           |
| 46  | ASV22     | 0.00793040469095453 | 3W_8   | Proteobacteria    | Sphingomonadaceae          | Plot4-2H12               | NA           |
| 47  | ASV46     | 0.00769809477928609 | 3W_11  | Proteobacteria    | Devosiaceae                | Devosia                  | limi         |

|    |        |                     |       |                  |                       |                            |               |
|----|--------|---------------------|-------|------------------|-----------------------|----------------------------|---------------|
| 48 | ASV155 | 0.0067543934904409  | 3W_11 | Bdellovibrionota | Bacteriovoraceae      | Bacteriovorax              | NA            |
| 49 | ASV45  | 0.0065761573301819  | 3W_8  | Proteobacteria   | Sphingomonadaceae     | Sphingomonas               | koreensis     |
| 50 | ASV50  | 0.00654981488936257 | 3W_11 | Proteobacteria   | Alteromonadaceae      | Rheinheimera               | pacifica      |
| 51 | ASV36  | 0.00644422593396731 | 3W_11 | Proteobacteria   | Sphingomonadaceae     | Novosphingobium            | NA            |
| 52 | ASV77  | 0.00636411442400665 | 3W_8  | Proteobacteria   | Solimonadaceae        | Nevskia                    | NA            |
| 53 | ASV59  | 0.00597567494440082 | 3W_11 | Actinobacteriota | Microbacteriaceae     | Galbitalea                 | NA            |
| 54 | ASV157 | 0.00587008598900555 | 3W_11 | Actinobacteriota | Pseudonocardiaceae    | Pseudonocardia             | NA            |
| 55 | ASV81  | 0.00576449703361028 | 3W_11 | Proteobacteria   | Xanthomonadaceae      | Stenotrophomonas           | NA            |
| 56 | ASV65  | 0.00563911014907841 | 3W_11 | Proteobacteria   | Beijerinckiaceae      | Bosea                      | NA            |
| 57 | ASV2   | 0.00554138794804666 | 3W_8  | Proteobacteria   | Solimonadaceae        | Polycyclovorans            | NA            |
| 58 | ASV33  | 0.00540563017173271 | 3B_11 | Proteobacteria   | Comamonadaceae        | Rhizobacter                | NA            |
| 59 | ASV58  | 0.00527284846005108 | 3W_11 | Proteobacteria   | Xanthomonadaceae      | Thermomonas                | NA            |
| 60 | ASV78  | 0.00520685536292904 | 3W_11 | Proteobacteria   | Xanthomonadaceae      | Arenimonas                 | NA            |
| 61 | ASV150 | 0.00508476813325326 | 3W_11 | Bacteroidota     | Sphingobacteriaceae   | Pedobacter                 | NA            |
| 62 | ASV42  | 0.00494484057200694 | 3W_8  | Firmicutes       | Enterococcaceae       | Enterococcus               | cecorum       |
| 63 | ASV44  | 0.00475258833707471 | 3W_8  | Firmicutes       | Caldalkalibacillaceae | Caldalkalibacillus         | thermarum     |
| 64 | ASV83  | 0.00467561093109661 | 3W_11 | Proteobacteria   | Moraxellaceae         | Acinetobacter              | NA            |
| 65 | ASV182 | 0.00460301852426236 | 3W_11 | Acidobacteriota  | Blastocatellaceae     | Stenotrophobacter          | NA            |
| 66 | ASV57  | 0.00457002197570134 | 3W_11 | Bacteroidota     | Cyclobacteriaceae     | Algoriphagus               | NA            |
| 67 | ASV70  | 0.00442483716203285 | 3W_11 | Proteobacteria   | Oxalobacteraceae      | Massilia                   | NA            |
| 68 | ASV82  | 0.00441823785232065 | 3W_11 | Proteobacteria   | Caulobacteraceae      | Brevundimonas              | NA            |
| 69 | ASV20  | 0.00439901369482421 | 3B_8  | Proteobacteria   | Xanthobacteraceae     | Bradyrhizobium             | NA            |
| 70 | ASV71  | 0.00439103497026903 | 3B_11 | Proteobacteria   | Ferrovibrionaceae     | Ferrovibrio                | NA            |
| 71 | ASV16  | 0.00434945319971724 | 3B_11 | Proteobacteria   | Comamonadaceae        | Limnohabitans              | NA            |
| 72 | ASV53  | 0.00434829319596723 | 3W_8  | Proteobacteria   | Oxalobacteraceae      | Undibacterium              | parvum        |
| 73 | ASV63  | 0.00429539689799992 | 3B_11 | Proteobacteria   | Sphingomonadaceae     | Sphingomonas               | sanxanigenens |
| 74 | ASV55  | 0.00429123872094474 | 3B_11 | Bacteroidota     | Chitinophagaceae      | Terrimonas                 | solii         |
| 75 | ASV16  | 0.00413776718955197 | 3W_11 | Proteobacteria   | Comamonadaceae        | Limnohabitans              | NA            |
| 76 | ASV56  | 0.00393268909986373 | 3W_8  | Proteobacteria   | Comamonadaceae        | Rhodoferax                 | NA            |
| 77 | ASV66  | 0.00384079825250279 | 3W_11 | Proteobacteria   | Comamonadaceae        | Variovorax                 | NA            |
| 78 | ASV115 | 0.00383419894279058 | 3W_11 | Bacteroidota     | Spirosomaceae         | Dyadobacter                | NA            |
| 79 | ASV41  | 0.00380120239422956 | 3W_11 | Proteobacteria   | Acidiferrobacteraceae | Sulfurifustis              | NA            |
| 80 | ASV107 | 0.00380120239422956 | 3W_11 | Bacteroidota     | Chitinophagaceae      | Edaphobaculum              | NA            |
| 81 | ASV67  | 0.00380120239422956 | 3W_11 | Actinobacteriota | Solirubrobacteraceae  | Patulibacter               | minatonensis  |
| 82 | ASV134 | 0.00367581550969769 | 3W_11 | Proteobacteria   | Rhizobiaceae          | Allorhizobium-Neorhizobium | NA            |
| 83 | ASV86  | 0.00355949358499528 | 3W_8  | Myxococcota      | Myxococcaceae         | P3OB-42                    | NA            |
| 84 | ASV10  | 0.00355042862516581 | 3W_11 | Proteobacteria   | Hyphomicrobiaceae     | Hyphomicrobium             | NA            |
| 85 | ASV73  | 0.00351781778868144 | 3B_11 | Proteobacteria   | Sphingomonadaceae     | Sphingomonas               | NA            |
| 86 | ASV24  | 0.00342217971641232 | 3B_11 | Proteobacteria   | Xanthomonadaceae      | Pseudoxanthomonas          | mexicana      |
| 87 | ASV4   | 0.00330311905506099 | 3B_8  | Proteobacteria   | Caulobacteraceae      | Caulobacter                | NA            |
| 88 | ASV88  | 0.00328315658182154 | 3W_11 | Actinobacteriota | Intrasporangiaceae    | Knoellia                   | NA            |
| 89 | ASV108 | 0.00314457107786526 | 3W_11 | Actinobacteriota | Nakamurellaceae       | Nakamurella                | NA            |
| 90 | ASV238 | 0.00309507625502372 | 3W_11 | Bacteroidota     | Chitinophagaceae      | Ferruginibacter            | NA            |
| 91 | ASV318 | 0.00304558143218219 | 3W_11 | Actinobacteriota | Nocardioidaceae       | Nocardioides               | NA            |
| 92 | ASV42  | 0.00301918419333338 | 3W_11 | Firmicutes       | Enterococcaceae       | Enterococcus               | cecorum       |
| 93 | ASV97  | 0.00298288798991625 | 3W_11 | Proteobacteria   | Hyphomonadaceae       | SWB02                      | NA            |
| 94 | ASV188 | 0.00296638971563574 | 3W_11 | Bdellovibrionota | Bacteriovoraceae      | Peredibacter               | NA            |
| 95 | ASV118 | 0.00291359523793811 | 3W_11 | Proteobacteria   | Hyphomonadaceae       | Hirschia                   | NA            |
| 96 | ASV65  | 0.00289824940745977 | 3B_11 | Proteobacteria   | Beijerinckiaceae      | Bosea                      | NA            |

|     |        |                     |       |                   |                       |                        |              |
|-----|--------|---------------------|-------|-------------------|-----------------------|------------------------|--------------|
| 97  | ASV20  | 0.00288095628523446 | 3W_8  | Proteobacteria    | Xanthobacteraceae     | Bradyrhizobium         | NA           |
| 98  | ASV84  | 0.00285750110538438 | 3W_11 | Proteobacteria    | Comamonadaceae        | Hydrogenophaga         | NA           |
| 99  | ASV101 | 0.00274201318542081 | 3W_11 | Myxococcota       | Nannocystaceae        | Nannocystis            | NA           |
| 100 | ASV178 | 0.00271231629171589 | 3W_11 | Proteobacteria    | Steroidbacteraceae    | Steroidbacter          | NA           |
| 101 | ASV106 | 0.00253083527463027 | 3W_11 | Actinobacteriota  | Microbacteriaceae     | Salinibacterium        | NA           |
| 102 | ASV125 | 0.00251341524786402 | 3W_8  | Proteobacteria    | Nitrosomonadaceae     | MND1                   | NA           |
| 103 | ASV82  | 0.00247383390537797 | 3W_8  | Proteobacteria    | Caulobacteraceae      | Brevundimonas          | NA           |
| 104 | ASV293 | 0.00246484217750823 | 3W_11 | Proteobacteria    | Sphingomonadaceae     | Altererythrobacter     | NA           |
| 105 | ASV102 | 0.0024153473546667  | 3W_11 | Proteobacteria    | Pseudohongiellaceae   | Pseudohongiella        | NA           |
| 106 | ASV145 | 0.0024087480449545  | 3W_11 | Verrucomicrobiota | Verrucomicrobiaceae   | Verrucomicrobium       | NA           |
| 107 | ASV62  | 0.00237488054916285 | 3W_8  | Firmicutes        | Staphylococcaceae     | Staphylococcus         | NA           |
| 108 | ASV135 | 0.00231635770898364 | 3W_11 | Proteobacteria    | Rhodobacteraceae      | Rhodobacter            | NA           |
| 109 | ASV230 | 0.00231635770898364 | 3W_11 | Proteobacteria    | Sphingomonadaceae     | Sphingorhabdus         | NA           |
| 110 | ASV341 | 0.00231305805412754 | 3W_11 | Bdellovibrionota  | Bdellovibrionaceae    | Bdellovibrio           | NA           |
| 111 | ASV116 | 0.00229985943470313 | 3W_11 | Actinobacteriota  | Microbacteriaceae     | Lysinimonas            | NA           |
| 112 | ASV94  | 0.00228996047013482 | 3W_11 | Proteobacteria    | Moraxellaceae         | Enhydrobacter          | aerosaccus   |
| 113 | ASV93  | 0.00223634585046169 | 3W_8  | Proteobacteria    | Xanthobacteraceae     | Rhodoplanes            | NA           |
| 114 | ASV112 | 0.00216787324045905 | 3W_11 | Proteobacteria    | Rhodobacteraceae      | Tabrizicola            | aquatica     |
| 115 | ASV24  | 0.00214147600161023 | 3W_11 | Proteobacteria    | Xanthomonadaceae      | Pseudoxanthomonas      | mexicana     |
| 116 | ASV100 | 0.00213456525549757 | 3W_8  | Proteobacteria    | Gallionellaceae       | Candidatus Nitrotoga   | NA           |
| 117 | ASV79  | 0.00212042906175255 | 3W_8  | Actinobacteriota  | Corynebacteriaceae    | Corynebacterium        | NA           |
| 118 | ASV202 | 0.00210517979819311 | 3W_11 | Proteobacteria    | Methylophilaceae      | Methylophilus          | NA           |
| 119 | ASV119 | 0.00210188014333701 | 3W_11 | Proteobacteria    | Alcaligenaceae        | Candidimonas           | NA           |
| 120 | ASV210 | 0.0020886815239126  | 3W_11 | Actinobacteriota  | Nocardoidaceae        | Aeromicrobium          | NA           |
| 121 | ASV109 | 0.00207236600301949 | 3W_8  | Verrucomicrobiota | Omnitrophaceae        | Candidatus Omnitrophus | NA           |
| 122 | ASV317 | 0.00205238532049548 | 3W_11 | Acidobacteriota   | Blastocatellaceae     | JGI 0001001-H03        | NA           |
| 123 | ASV363 | 0.00201608911707835 | 3W_11 | Proteobacteria    | Nitrosomonadaceae     | Ellin6067              | NA           |
| 124 | ASV44  | 0.00197979291366123 | 3W_11 | Firmicutes        | Caldalkalibacillaceae | Caldalkalibacillus     | thermarum    |
| 125 | ASV22  | 0.00195009601995631 | 3W_11 | Proteobacteria    | Sphingomonadaceae     | Plot4-2H12             | NA           |
| 126 | ASV138 | 0.00194019705538801 | 3W_11 | Firmicutes        | Planococcaceae        | Planomicrobium         | NA           |
| 127 | ASV100 | 0.0019269984359636  | 3W_11 | Proteobacteria    | Gallionellaceae       | Candidatus Nitrotoga   | NA           |
| 128 | ASV128 | 0.00190720050682699 | 3W_11 | Bacteroidota      | Chitinophagaceae      | Rurimicrobium          | NA           |
| 129 | ASV156 | 0.00189730154225868 | 3W_11 | Actinobacteriota  | Nocardiaceae          | Rhodococcus            | NA           |
| 130 | ASV144 | 0.00189400188740258 | 3W_11 | Nitrospirota      | Nitrospiraceae        | Nitrospira             | NA           |
| 131 | ASV133 | 0.00184120740970494 | 3W_11 | Bacteroidota      | Flavobacteriaceae     | Aequorivita            | nionensis    |
| 132 | ASV142 | 0.00183487794810321 | 3W_8  | Bacteroidota      | Sphingobacteriaceae   | Sphingobacterium       | NA           |
| 133 | ASV255 | 0.00183460809999274 | 3W_11 | Proteobacteria    | Rhodanobacteraceae    | Ahniella               | NA           |
| 134 | ASV33  | 0.0018320507093542  | 3W_8  | Proteobacteria    | Comamonadaceae        | Rhizobacter            | NA           |
| 135 | ASV209 | 0.00181810982571223 | 3W_11 | Bdellovibrionota  | Oligoflexaceae        | Oligoflexus            | NA           |
| 136 | ASV350 | 0.00181810982571223 | 3W_11 | Planctomycetota   | Pirellulaceae         | Pirellula              | NA           |
| 137 | ASV289 | 0.00180491120628782 | 3W_11 | Proteobacteria    | Comamonadaceae        | Polaromonas            | NA           |
| 138 | ASV5   | 0.00180161155143172 | 3W_11 | Proteobacteria    | Reyranellaceae        | Reyranella             | NA           |
| 139 | ASV211 | 0.00178801613372697 | 3B_11 | Proteobacteria    | Rhodobacteraceae      | Paracoccus             | NA           |
| 140 | ASV136 | 0.0017719146577268  | 3W_11 | Proteobacteria    | Rhizobiaceae          | Pseudorhizobium        | pelagicum    |
| 141 | ASV445 | 0.00175871603830239 | 3W_11 | Verrucomicrobiota | Chthoniobacteraceae   | Chthoniobacter         | NA           |
| 142 | ASV152 | 0.00175541638344629 | 3W_11 | Bacteroidota      | Microscillaceae       | Hassallia              | NA           |
| 143 | ASV211 | 0.00175211672859019 | 3W_11 | Proteobacteria    | Rhodobacteraceae      | Paracoccus             | NA           |
| 144 | ASV35  | 0.00175211672859019 | 3W_11 | Actinobacteriota  | Mycobacteriaceae      | Mycobacterium          | NA           |
| 145 | ASV139 | 0.00174881707373409 | 3W_11 | Bacteroidota      | Sphingobacteriaceae   | Pedobacter             | boryungensis |

|     |        |                     |       |                   |                       |                          |                |
|-----|--------|---------------------|-------|-------------------|-----------------------|--------------------------|----------------|
| 146 | ASV275 | 0.00172241983488527 | 3W_11 | Proteobacteria    | Moraxellaceae         | Psychrobacter            | NA             |
| 147 | ASV330 | 0.00170922121546086 | 3W_11 | Acidobacteriota   | Bryobacteraceae       | Bryobacter               | NA             |
| 148 | ASV7   | 0.00170262190574866 | 3W_11 | Cyanobacteria     | Obscuribacteraceae    | Candidatus Obscuribacter | NA             |
| 149 | ASV141 | 0.00168942328632425 | 3W_11 | Firmicutes        | Lactobacillaceae      | Fructobacillus           | fructosus      |
| 150 | ASV10  | 0.00166699466330181 | 3B_8  | Proteobacteria    | Hyphomicrobiaceae     | Hyphomicrobium           | NA             |
| 151 | ASV358 | 0.00163332915377052 | 3W_11 | Proteobacteria    | Xanthomonadaceae      | Luteimonas               | NA             |
| 152 | ASV186 | 0.00161753087446463 | 3B_11 | Proteobacteria    | Sphingomonadaceae     | Porphyrobacter           | NA             |
| 153 | ASV132 | 0.00159456265443792 | 3W_8  | Proteobacteria    | Rhizobiaceae          | Phyllobacterium          | NA             |
| 154 | ASV6   | 0.00158053467607288 | 3W_11 | Proteobacteria    | Caulobacteraceae      | Phenylbacterium          | NA             |
| 155 | ASV442 | 0.00157393536636068 | 3W_11 | Verrucomicrobiota | Opitutaceae           | IMCC26134                | NA             |
| 156 | ASV34  | 0.00153763916294356 | 3W_11 | Proteobacteria    | Acetobacteraceae      | Roseococcus              | NA             |
| 157 | ASV322 | 0.00151784123380694 | 3W_11 | Verrucomicrobiota | Opitutaceae           | Lacunisphaera            | NA             |
| 158 | ASV62  | 0.00150794226923864 | 3W_11 | Firmicutes        | Staphylococcaceae     | Staphylococcus           | NA             |
| 159 | ASV6   | 0.0015052600939748  | 3B_11 | Proteobacteria    | Caulobacteraceae      | Phenylbacterium          | NA             |
| 160 | ASV266 | 0.00148484468524592 | 3W_11 | Proteobacteria    | Unknown Family        | Candidatus Berkiella     | NA             |
| 161 | ASV378 | 0.00148154503038982 | 3W_11 | Proteobacteria    | Rhizobiaceae          | Mesorhizobium            | NA             |
| 162 | ASV114 | 0.00148147310447778 | 3W_8  | Firmicutes        | Bacillaceae           | Falsibacillus            | NA             |
| 163 | ASV265 | 0.00143205020754829 | 3W_11 | Proteobacteria    | Xanthomonadaceae      | Pseudoxanthomonas        | NA             |
| 164 | ASV15  | 0.00142875055269219 | 3W_11 | Proteobacteria    | Sphingomonadaceae     | Sphingobium              | NA             |
| 165 | ASV77  | 0.00142875055269219 | 3W_11 | Proteobacteria    | Solimonadaceae        | Nevskia                  | NA             |
| 166 | ASV204 | 0.00141555193326778 | 3W_11 | Planctomycetota   | Schlesneriaceae       | Planctopirus             | NA             |
| 167 | ASV242 | 0.00141555193326778 | 3W_11 | Bacteroidota      | Microscillaceae       | Chryseolinea             | NA             |
| 168 | ASV292 | 0.00141225227841168 | 3W_11 | Bacteroidota      | Spirosomaceae         | Persicitalea             | NA             |
| 169 | ASV301 | 0.00139575400413117 | 3W_11 | Proteobacteria    | Comamonadaceae        | Leptothrix               | NA             |
| 170 | ASV207 | 0.00135615814585794 | 3W_11 | Proteobacteria    | Unknown Family        | Acidibacter              | NA             |
| 171 | ASV82  | 0.00135140754293318 | 3B_11 | Proteobacteria    | Caulobacteraceae      | Brevundimonas            | NA             |
| 172 | ASV171 | 0.00134955883614574 | 3W_11 | Proteobacteria    | Caulobacteraceae      | Caulobacter              | fusiformis     |
| 173 | ASV184 | 0.00134295952643354 | 3W_11 | Deinococcota      | Deinococcaceae        | Deinococcus              | NA             |
| 174 | ASV633 | 0.00131326263272862 | 3W_11 | Proteobacteria    | Sphingomonadaceae     | Rhizorhapis              | NA             |
| 175 | ASV409 | 0.00130666332301641 | 3W_11 | Planctomycetota   | Gemmataceae           | Gemmata                  | NA             |
| 176 | ASV249 | 0.001293464703592   | 3W_11 | Proteobacteria    | Alteromonadaceae      | Rheinheimera             | NA             |
| 177 | ASV79  | 0.00127036711959929 | 3W_11 | Actinobacteriota  | Corynebacteriaceae    | Corynebacterium          | NA             |
| 178 | ASV765 | 0.00125056919046268 | 3W_11 | Planctomycetota   | Rubinisphaeraceae     | SH-PL14                  | NA             |
| 179 | ASV191 | 0.00124396988075047 | 3W_11 | Actinobacteriota  | Micrococcaceae        | Pseudarthrobacter        | NA             |
| 180 | ASV161 | 0.00122984885581648 | 3W_8  | Actinobacteriota  | Thermomonosporaceae   | Actinoallomurus          | NA             |
| 181 | ASV19  | 0.00120779937410524 | 3B_8  | Proteobacteria    | Xanthobacteraceae     | Afipla                   | NA             |
| 182 | ASV181 | 0.00119117540305284 | 3W_11 | Firmicutes        | Caldalkalibacillaceae | Caldalkalibacillus       | NA             |
| 183 | ASV195 | 0.00118127643848453 | 3W_11 | Proteobacteria    | Xanthomonadaceae      | Thermomonas              | brevis         |
| 184 | ASV35  | 0.00118078788650545 | 3B_8  | Actinobacteriota  | Mycobacteriaceae      | Mycobacterium            | NA             |
| 185 | ASV196 | 0.00117137747391623 | 3W_11 | Actinobacteriota  | Nocardiodaceae        | Nocardioides             | alpinus        |
| 186 | ASV197 | 0.00116477816420402 | 3W_11 | Acidobacteriota   | Vicinamibacteraceae   | Vicinamibacter           | NA             |
| 187 | ASV313 | 0.00115157954477962 | 3W_11 | Proteobacteria    | Acetobacteraceae      | Roseomonas               | NA             |
| 188 | ASV480 | 0.00115157954477962 | 3W_11 | Planctomycetota   | Pirellulaceae         | Pir4 lineage             | NA             |
| 189 | ASV200 | 0.00114827988992351 | 3W_11 | Bacteroidota      | Flavobacteriaceae     | Flavobacterium           | tegetincola    |
| 190 | ASV474 | 0.00114498023506741 | 3W_11 | Myxococcota       | Haliangiaceae         | Haliangium               | NA             |
| 191 | ASV121 | 0.00113089549960136 | 3W_8  | Actinobacteriota  | Corynebacteriaceae    | Lawsonella               | clevelandensis |
| 192 | ASV487 | 0.0011218826510747  | 3W_11 | Proteobacteria    | Legionellaceae        | Legionella               | NA             |
| 193 | ASV206 | 0.00111198368650639 | 3W_11 | Verrucomicrobiota | Rubritaleaceae        | Luteolibacter            | gellanilyticus |
| 194 | ASV7   | 0.00109589463976323 | 3B_8  | Cyanobacteria     | Obscuribacteraceae    | Candidatus Obscuribacter | NA             |

|     |        |                      |       |                   |                        |                          |               |
|-----|--------|----------------------|-------|-------------------|------------------------|--------------------------|---------------|
| 195 | ASV213 | 0.00108228679280147  | 3W_11 | Proteobacteria    | Oxalobacteraceae       | Noviherbaspirillum       | suwonense     |
| 196 | ASV426 | 0.00107898713794537  | 3W_11 | Verrucomicrobiota | Rubritaleaceae         | Luteolibacter            | NA            |
| 197 | ASV189 | 0.00107152348587229  | 3W_8  | Firmicutes        | Planococcaceae         | Chungangia               | NA            |
| 198 | ASV357 | 0.00106908817337706  | 3W_11 | Acidobacteriota   | Blastocatellaceae      | Aridibacter              | NA            |
| 199 | ASV217 | 0.00106248886366486  | 3W_11 | Proteobacteria    | Sphingomonadaceae      | Sphingomonas             | jaspsi        |
| 200 | ASV12  | 0.00105918920880876  | 3W_11 | Bacteroidota      | Chitinophagaceae       | Terrimonas               | NA            |
| 201 | ASV342 | 0.00105588955395266  | 3W_11 | Proteobacteria    | Spongiibacteraceae     | BD1-7 clade              | NA            |
| 202 | ASV212 | 0.00105173281462926  | 3W_8  | Proteobacteria    | Halomonadaceae         | Halomonas                | NA            |
| 203 | ASV55  | 0.00103476938213524  | 3W_8  | Bacteroidota      | Chitinophagaceae       | Terrimonas               | solii         |
| 204 | ASV223 | 0.00103279196995994  | 3W_11 | Proteobacteria    | Rhodanobacteraceae     | Tahibacter               | aquaticus     |
| 205 | ASV490 | 0.00103279196995994  | 3W_11 | Gemmatimonadota   | Gemmatimonadaceae      | Gemmatimonas             | NA            |
| 206 | ASV559 | 0.00102619266024774  | 3W_11 | Proteobacteria    | Rhizobiaceae           | Aminobacter              | NA            |
| 207 | ASV231 | 0.00101299404082333  | 3W_11 | Proteobacteria    | Sphingomonadaceae      | Sphingopyxis             | witflariensis |
| 208 | ASV23  | 0.000987848689364034 | 3B_8  | Proteobacteria    | Sphingomonadaceae      | Sphingopyxis             | NA            |
| 209 | ASV205 | 0.000983879084653183 | 3W_8  | Bacteroidota      | Weeksellaceae          | Cloacibacterium          | NA            |
| 210 | ASV270 | 0.000973398182550105 | 3W_11 | Actinobacteriota  | Pseudonocardiaceae     | Actinomycetospora        | NA            |
| 211 | ASV20  | 0.000966798872837901 | 3W_11 | Proteobacteria    | Xanthobacteraceae      | Bradyrhizobium           | NA            |
| 212 | ASV655 | 0.000963499217981799 | 3W_11 | Proteobacteria    | Rhodobacteraceae       | Rubellimicrobium         | NA            |
| 213 | ASV278 | 0.000953600253413493 | 3W_11 | Proteobacteria    | Rhodomicrobiaceae      | Rhodomicrobium           | NA            |
| 214 | ASV246 | 0.000947000943701289 | 3W_11 | Proteobacteria    | Rhodobacteraceae       | Gemmobacter              | NA            |
| 215 | ASV239 | 0.000930161548422118 | 3W_8  | Actinobacteriota  | Bogoriellaceae         | Georgenia                | NA            |
| 216 | ASV325 | 0.000921679832175108 | 3W_8  | Firmicutes        | Streptococcaceae       | Streptococcus            | NA            |
| 217 | ASV491 | 0.000920603704852472 | 3W_11 | Proteobacteria    | Sphingomonadaceae      | Ellin6055                | NA            |
| 218 | ASV215 | 0.000918852593426104 | 3W_8  | Proteobacteria    | Gallionellaceae        | Sideroxydans             | NA            |
| 219 | ASV254 | 0.000914004395140268 | 3W_11 | Bacteroidota      | Sphingobacteriaceae    | Pedobacter               | luteus        |
| 220 | ASV259 | 0.000907405085428064 | 3W_11 | Actinobacteriota  | Pseudonocardiaceae     | Actinomycetospora        | iriomotensis  |
| 221 | ASV459 | 0.000907405085428064 | 3W_11 | Planctomycetota   | Gemmataceae            | Fimbrigliobus            | NA            |
| 222 | ASV272 | 0.00086780922715484  | 3W_11 | Actinobacteriota  | Intrasporangiaceae     | Ornithinibacter          | aureus        |
| 223 | ASV277 | 0.000857910262586533 | 3W_11 | Proteobacteria    | Rickettsiaceae         | Rickettsia               | NA            |
| 224 | ASV462 | 0.000851310952874329 | 3W_11 | Proteobacteria    | Geminococcaceae        | Candidatus Alysiosphaera | NA            |
| 225 | ASV548 | 0.000851310952874329 | 3W_11 | Proteobacteria    | Rhodanobacteraceae     | Chiayiivirga             | NA            |
| 226 | ASV230 | 0.00084817162470102  | 3W_8  | Proteobacteria    | Sphingomonadaceae      | Sphingorhabdus           | NA            |
| 227 | ASV284 | 0.000838112333449921 | 3W_11 | Proteobacteria    | Oxalobacteraceae       | Hermiinimonas            | NA            |
| 228 | ASV287 | 0.000824913714025513 | 3W_11 | Bacteroidota      | Flavobacteriaceae      | Flavobacterium           | terrigena     |
| 229 | ASV430 | 0.000824913714025513 | 3W_11 | Acidobacteriota   | Blastocatellaceae      | OLB17                    | NA            |
| 230 | ASV149 | 0.000819899237210985 | 3W_8  | Actinobacteriota  | Micrococcaceae         | Nesterenkonia            | NA            |
| 231 | ASV185 | 0.000798516475176696 | 3W_11 | Actinobacteriota  | Corynebacteriaceae     | Turicella                | otitidis      |
| 232 | ASV296 | 0.000798516475176696 | 3W_11 | Bacteroidota      | Sphingobacteriaceae    | Pedobacter               | insulae       |
| 233 | ASV702 | 0.000795216820320595 | 3W_11 | Verrucomicrobiota | Verrucomicrobiaceae    | Prostheobacter           | NA            |
| 234 | ASV268 | 0.000791917165464492 | 3W_11 | Proteobacteria    | Moraxellaceae          | Acinetobacter            | lwoffii       |
| 235 | ASV252 | 0.000785972372222945 | 3W_8  | Firmicutes        | Thermoactinomycetaceae | Novibacillus             | thermophilus  |
| 236 | ASV257 | 0.000780317894724938 | 3W_8  | Proteobacteria    | Unknown Family         | Candidatus Ovatusbacter  | NA            |
| 237 | ASV24  | 0.00077561557250848  | 3B_8  | Proteobacteria    | Xanthomonadaceae       | Pseudoxanthomonas        | mexicana      |
| 238 | ASV300 | 0.000775418891183982 | 3W_11 | Proteobacteria    | Xanthobacteraceae      | Rhodopseudomonas         | NA            |
| 239 | ASV265 | 0.000760527223481914 | 3W_8  | Proteobacteria    | Xanthomonadaceae       | Pseudoxanthomonas        | NA            |
| 240 | ASV483 | 0.000742422342622962 | 3W_11 | Myxococcota       | Sandaracinaceae        | Sandaracinus             | NA            |
| 241 | ASV498 | 0.000735823032910757 | 3W_11 | Bacteroidota      | Chitinophagaceae       | Puia                     | NA            |
| 242 | ASV23  | 0.00073225483599188  | 3W_8  | Proteobacteria    | Sphingomonadaceae      | Sphingopyxis             | NA            |
| 243 | ASV281 | 0.000726600358493873 | 3W_8  | Bacteroidota      | Sphingobacteriaceae    | Arcticibacter            | NA            |

|     |        |                      |       |                  |                      |                   |                  |
|-----|--------|----------------------|-------|------------------|----------------------|-------------------|------------------|
| 244 | ASV742 | 0.000722624413486349 | 3W_11 | Bacteroidota     | Cytophagaceae        | Cytophaga         | NA               |
| 245 | ASV540 | 0.000719324758630247 | 3W_11 | Actinobacteriota | Nocardioideaceae     | Marmoricola       | NA               |
| 246 | ASV861 | 0.000716025103774145 | 3W_11 | Actinobacteriota | Solirubrobacteraceae | Solirubrobacter   | NA               |
| 247 | ASV514 | 0.000709425794061941 | 3W_11 | Proteobacteria   | Xanthomonadaceae     | Lysobacter        | NA               |
| 248 | ASV316 | 0.000699526829493635 | 3W_11 | Bacteroidota     | Sphingobacteriaceae  | Pedobacter        | heparinus        |
| 249 | ASV803 | 0.000689627864925329 | 3W_11 | Bdellovibrionota | Bdellovibrionaceae   | OM27 clade        | NA               |
| 250 | ASV312 | 0.000686328210069227 | 3W_11 | Proteobacteria   | Comamonadaceae       | Aquabacterium     | NA               |
| 251 | ASV709 | 0.000686328210069227 | 3W_11 | Actinobacteriota | Iamiaceae            | Iamia             | NA               |
| 252 | ASV319 | 0.000683028555213125 | 3W_11 | Proteobacteria   | Comamonadaceae       | Ramlibacter       | NA               |
| 253 | ASV321 | 0.000673129590644819 | 3W_11 | Actinobacteriota | Micromonosporaceae   | Virgisporangium   | aliadipatigenens |
| 254 | ASV546 | 0.000669829935788717 | 3W_11 | Proteobacteria   | Pseudohongiellaceae  | Blyi10            | NA               |
| 255 | ASV597 | 0.000640133042083798 | 3W_11 | Bacteroidota     | Crocinitomicaceae    | Fluviicola        | NA               |
| 256 | ASV711 | 0.000640133042083798 | 3W_11 | Acidobacteriota  | Blastocatellaceae    | Blastocatella     | NA               |
| 257 | ASV336 | 0.000636833387227696 | 3W_11 | Actinobacteriota | Cryptosporangiaceae  | Cryptosporangium  | NA               |
| 258 | ASV577 | 0.000636833387227696 | 3W_11 | Proteobacteria   | Beijerinckiaceae     | Microvirga        | NA               |
| 259 | ASV672 | 0.000636833387227696 | 3W_11 | Actinobacteriota | Micromonosporaceae   | Actinoplanes      | NA               |
| 260 | ASV5   | 0.000636699350566662 | 3B_8  | Proteobacteria   | Reyranellaceae       | Reyranella        | NA               |
| 261 | ASV338 | 0.00063353732371594  | 3W_11 | Proteobacteria   | Beijerinckiaceae     | Camelimonas       | NA               |
| 262 | ASV34  | 0.000632840566623834 | 3B_8  | Proteobacteria   | Acetobacteraceae     | Roseococcus       | NA               |
| 263 | ASV73  | 0.000621992524780748 | 3W_8  | Proteobacteria   | Sphingomonadaceae    | Sphingomonas      | NA               |
| 264 | ASV576 | 0.000620335112947186 | 3W_11 | Proteobacteria   | Xanthobacteraceae    | Tardiphaga        | robiniae         |
| 265 | ASV349 | 0.000607136493522778 | 3W_11 | Proteobacteria   | Xanthomonadaceae     | Lysobacter        | spongiicola      |
| 266 | ASV62  | 0.000602935673000956 | 3B_11 | Firmicutes       | Staphylococcaceae    | Staphylococcus    | NA               |
| 267 | ASV351 | 0.000600537183810573 | 3W_11 | Proteobacteria   | Comamonadaceae       | Paucibacter       | NA               |
| 268 | ASV441 | 0.000594619318890598 | 3B_11 | Firmicutes       | Bacillaceae          | Bacillus          | NA               |
| 269 | ASV360 | 0.000587338564386165 | 3W_11 | Proteobacteria   | Comamonadaceae       | Hydrogenophaga    | palleronii       |
| 270 | ASV816 | 0.000584038909530063 | 3W_11 | Proteobacteria   | Kaistiaceae          | Kaistia           | NA               |
| 271 | ASV367 | 0.000580739254673961 | 3W_11 | Proteobacteria   | Reyranellaceae       | Reyranella        | aquatilis        |
| 272 | ASV371 | 0.000567540635249553 | 3W_11 | Proteobacteria   | Caulobacteraceae     | Asticcacaulis     | excentricus      |
| 273 | ASV372 | 0.000567540635249553 | 3W_11 | Bacteroidota     | Crocinitomicaceae    | Salinirepens      | NA               |
| 274 | ASV380 | 0.000557641670681247 | 3W_11 | Bacteroidota     | Flavobacteriaceae    | Flavobacterium    | buctense         |
| 275 | ASV381 | 0.000557641670681247 | 3W_11 | Proteobacteria   | Comamonadaceae       | Pseudorhodofera   | NA               |
| 276 | ASV383 | 0.000554342015825145 | 3W_11 | Proteobacteria   | Alcaligenaceae       | Achromobacter     | NA               |
| 277 | ASV384 | 0.000551042360969043 | 3W_11 | Proteobacteria   | Sutterellaceae       | AAP99             | NA               |
| 278 | ASV386 | 0.000551042360969043 | 3W_11 | Proteobacteria   | Solimonadaceae       | Nevskia           | ramosa           |
| 279 | ASV149 | 0.000548879371283629 | 3B_11 | Actinobacteriota | Micrococcaceae       | Nesterenkonia     | NA               |
| 280 | ASV467 | 0.000548879371283629 | 3B_11 | Proteobacteria   | Sphingomonadaceae    | Blastomonas       | NA               |
| 281 | ASV121 | 0.000547742706112941 | 3W_11 | Actinobacteriota | Corynebacteriaceae   | Lawsonella        | clevelandensis   |
| 282 | ASV365 | 0.000547742706112941 | 3W_11 | Actinobacteriota | Micrococcaceae       | Paenarthrobacter  | NA               |
| 283 | ASV464 | 0.000547742706112941 | 3W_11 | Firmicutes       | Lactobacillaceae     | Fructobacillus    | NA               |
| 284 | ASV388 | 0.000544443051256839 | 3W_11 | Proteobacteria   | Comamonadaceae       | Piscinibacter     | NA               |
| 285 | ASV390 | 0.000544443051256839 | 3W_11 | Proteobacteria   | Rhodanobacteraceae   | Dokdonella        | NA               |
| 286 | ASV2   | 0.000540563017173271 | 3B_11 | Proteobacteria   | Solimonadaceae       | Polycyclovorans   | NA               |
| 287 | ASV234 | 0.000537175362310646 | 3W_8  | Firmicutes       | Bacillaceae          | Ornithinibacillus | NA               |
| 288 | ASV345 | 0.000537175362310646 | 3W_8  | Proteobacteria   | Enterobacteriaceae   | Citrobacter       | NA               |
| 289 | ASV234 | 0.000534544086688532 | 3W_11 | Firmicutes       | Bacillaceae          | Ornithinibacillus | NA               |
| 290 | ASV402 | 0.000524645122120226 | 3W_11 | Proteobacteria   | Methylophilaceae     | Methylothera      | versatilis       |
| 291 | ASV403 | 0.000524645122120226 | 3W_11 | Firmicutes       | Planococcaceae       | Sporosarcina      | NA               |
| 292 | ASV674 | 0.000520211929816625 | 3W_8  | Firmicutes       | Paenibacillaceae     | Thermobacillus    | NA               |

|     |         |                      |       |                   |                               |                         |               |
|-----|---------|----------------------|-------|-------------------|-------------------------------|-------------------------|---------------|
| 293 | ASV408  | 0.000518045812408022 | 3W_11 | Proteobacteria    | Burkholderiaceae              | Cupriavidus             | NA            |
| 294 | ASV412  | 0.00051474615755192  | 3W_11 | Actinobacteriota  | Nocardioideae                 | Nocardioides            | daedukensis   |
| 295 | ASV415  | 0.000511446502695818 | 3W_11 | Verrucomicrobiota | Rubritaleaceae                | Luteolibacter           | flavescens    |
| 296 | ASV778  | 0.000511446502695818 | 3W_11 | Bacteroidota      | Sphingobacteriaceae           | Mucilaginibacter        | NA            |
| 297 | ASV416  | 0.000508146847839716 | 3W_11 | Proteobacteria    | Cellvibrionaceae              | Marinagarivorans        | NA            |
| 298 | ASV212  | 0.00049824788327141  | 3W_11 | Proteobacteria    | Halomonadaceae                | Halomonas               | NA            |
| 299 | ASV716  | 0.00049824788327141  | 3W_11 | Planctomycetota   | Pirellulaceae                 | Rhodopirellula          | NA            |
| 300 | ASV361  | 0.000488348918703104 | 3W_11 | Actinobacteriota  | Corynebacteriaceae            | Corynebacterium         | suicordis     |
| 301 | ASV204  | 0.000483457826079581 | 3W_8  | Planctomycetota   | Schlesneriaceae               | Planctopirus            | NA            |
| 302 | ASV114  | 0.0004817496089909   | 3W_11 | Firmicutes        | Bacillaceae                   | Falsibacillus           | NA            |
| 303 | ASV333  | 0.000477803348581574 | 3W_8  | Proteobacteria    | Oxalobacteraceae              | Undibacterium           | NA            |
| 304 | ASV437  | 0.000475150299278695 | 3W_11 | Proteobacteria    | Solimonadaceae                | Hydrocarboniphaga       | effusa        |
| 305 | ASV387  | 0.000472148871083568 | 3W_8  | Proteobacteria    | Alcanivoracaceae1             | Alcanivorax             | NA            |
| 306 | ASV448  | 0.000461951679854287 | 3W_11 | Proteobacteria    | Nitrosomonadaceae             | mle1-7                  | NA            |
| 307 | ASV181  | 0.000460839916087554 | 3W_8  | Firmicutes        | Caldalkalibacillaceae         | Caldalkalibacillus      | NA            |
| 308 | ASV44   | 0.000453241299014512 | 3B_11 | Firmicutes        | Caldalkalibacillaceae         | Caldalkalibacillus      | thermarum     |
| 309 | ASV457  | 0.000448753060429879 | 3W_11 | Deinococcota      | Trueperaceae                  | Truepera                | NA            |
| 310 | ASV458  | 0.000448753060429879 | 3W_11 | Bacteroidota      | Rhodothermaceae               | Rubrivirga              | NA            |
| 311 | ASV638  | 0.000448753060429879 | 3W_11 | Bacteroidota      | Chitinophagaceae              | Niastella               | NA            |
| 312 | ASV785  | 0.000445453405573777 | 3W_11 | Proteobacteria    | Xanthobacteraceae             | Variibacter             | NA            |
| 313 | ASV463  | 0.000442153750717675 | 3W_11 | Actinobacteriota  | Geodermatophilaceae           | Blastococcus            | NA            |
| 314 | ASV468  | 0.000435554441005471 | 3W_11 | Bacteroidota      | Weeksellaceae                 | Chryseobacterium        | antarcticum   |
| 315 | ASV469  | 0.000435554441005471 | 3W_11 | Actinobacteriota  | Demequinaceae                 | Demequina               | NA            |
| 316 | ASV472  | 0.000435554441005471 | 3W_11 | Proteobacteria    | Devosiaceae                   | Devosia                 | enhydra       |
| 317 | ASV418  | 0.000435394767346523 | 3W_8  | Campylobacterota  | Campylobacteraceae            | Campylobacter           | gracilis      |
| 318 | ASV388  | 0.000432183801596765 | 3B_8  | Proteobacteria    | Comamonadaceae                | Piscinibacter           | NA            |
| 319 | ASV482  | 0.000422355821581063 | 3W_11 | Proteobacteria    | Rhodobacteraceae              | Cereibacter             | changlensis   |
| 320 | ASV15   | 0.00041997588257308  | 3B_11 | Proteobacteria    | Sphingomonadaceae             | Sphingobium             | NA            |
| 321 | ASV545  | 0.000412456857012756 | 3W_11 | Proteobacteria    | Moraxellaceae                 | Cavicella               | NA            |
| 322 | ASV55   | 0.000409031097939795 | 3B_8  | Bacteroidota      | Chitinophagaceae              | Terrimonas              | solii         |
| 323 | ASV445  | 0.000407122379856489 | 3W_8  | Verrucomicrobiota | Chthoniobacteraceae           | Chthoniobacter          | NA            |
| 324 | ASV497  | 0.000405857547300552 | 3W_11 | Actinobacteriota  | Actinomycetaceae              | Actinomyces             | odontolyticus |
| 325 | ASV99   | 0.000403343174352364 | 3B_11 | Proteobacteria    | Pseudomonadaceae              | Pseudomonas             | NA            |
| 326 | ASV447  | 0.000398640663609479 | 3W_8  | Firmicutes        | Ruminococcaceae               | Ruminococcus            | bromii        |
| 327 | ASV239  | 0.000395958582732246 | 3W_11 | Actinobacteriota  | Bogoriellaceae                | Georgenia               | NA            |
| 328 | ASV454  | 0.000392986186111472 | 3W_8  | Proteobacteria    | Alcaligenaceae                | Pigmentiphaga           | NA            |
| 329 | ASV519  | 0.000392658927876144 | 3W_11 | Proteobacteria    | Azospirillales Incertae Sedis | Stella                  | humosa        |
| 330 | ASV751  | 0.00038605961816394  | 3W_11 | Proteobacteria    | Rhodobacteraceae              | Amaricoccus             | NA            |
| 331 | ASV534  | 0.000384504469864462 | 3W_8  | Chloroflexi       | Anaerolineaceae               | Anaerolineaceae UCG-001 | NA            |
| 332 | ASV533  | 0.000379460308451736 | 3W_11 | Actinobacteriota  | Kineosporiaceae               | Kineosporia             | rhamnosa      |
| 333 | ASV465  | 0.000378849992366455 | 3W_8  | Actinobacteriota  | Micromonosporaceae            | Salinispora             | NA            |
| 334 | ASV538  | 0.000376160653595634 | 3W_11 | Bdellovibrionota  | Bacteriovoracaceae            | Peredibacter            | starii        |
| 335 | ASV6    | 0.000366584474568684 | 3B_8  | Proteobacteria    | Caulobacteraceae              | Phenylbacterium         | NA            |
| 336 | ASV834  | 0.000366261689027328 | 3W_11 | Proteobacteria    | Xanthobacteraceae             | Pseudolabrys            | NA            |
| 337 | ASV552  | 0.000362962034171226 | 3W_11 | Proteobacteria    | Rhodocyclaceae                | Propionivibrio          | NA            |
| 338 | ASV553  | 0.000362962034171226 | 3W_11 | Proteobacteria    | Acetobacteraceae              | Roseomonas              | tokyonensis   |
| 339 | ASV63   | 0.000362725690625856 | 3B_8  | Proteobacteria    | Sphingomonadaceae             | Sphingomonas            | sanxanigenens |
| 340 | ASV1004 | 0.00035306306960292  | 3W_11 | Verrucomicrobiota | Pedosphaeraceae               | Ellin517                | NA            |
| 341 | ASV870  | 0.00035306306960292  | 3W_11 | Chloroflexi       | Chloroflexaceae               | FFCH7168                | NA            |

|     |         |                      |       |                   |                      |                        |                  |
|-----|---------|----------------------|-------|-------------------|----------------------|------------------------|------------------|
| 342 | ASV770  | 0.000349763414746818 | 3W_11 | Proteobacteria    | Sphingomonadaceae    | Erythrobacter          | NA               |
| 343 | ASV569  | 0.000349763414746817 | 3W_11 | Proteobacteria    | Comamonadaceae       | Polaromonas            | eurypsychrophila |
| 344 | ASV94   | 0.000349286872635037 | 3B_11 | Proteobacteria    | Moraxellaceae        | Enhydrobacter          | aerosaccus       |
| 345 | ASV205  | 0.000346463759890715 | 3W_11 | Bacteroidota      | Weeksellaceae        | Cloacibacterium        | NA               |
| 346 | ASV1045 | 0.000343164105034613 | 3W_11 | Proteobacteria    | Hyphomicrobiaceae    | Pedomicrobium          | NA               |
| 347 | ASV585  | 0.000343164105034613 | 3W_11 | Planctomycetota   | Gemmataceae          | Zavarzinella           | NA               |
| 348 | ASV379  | 0.000336564795322409 | 3W_11 | Firmicutes        | Planococcaceae       | Solibacillus           | NA               |
| 349 | ASV592  | 0.000336564795322409 | 3W_11 | Proteobacteria    | Sphingomonadaceae    | Sphingourantiacus      | NA               |
| 350 | ASV787  | 0.000336564795322409 | 3W_11 | Proteobacteria    | Sphingomonadaceae    | Qipengyuania           | NA               |
| 351 | ASV363  | 0.000336441411131404 | 3W_8  | Proteobacteria    | Nitrosomonadaceae    | Ellin6067              | NA               |
| 352 | ASV596  | 0.00033265140466307  | 3W_11 | Proteobacteria    | Xanthomonadaceae     | Arenimonas             | aquatica         |
| 353 | ASV461  | 0.000330786933633398 | 3W_8  | Firmicutes        | Family XI            | Peptoniphilus          | NA               |
| 354 | ASV615  | 0.000320066521041899 | 3W_11 | Proteobacteria    | Sphingomonadaceae    | Sphingourantiacus      | polygranulatus   |
| 355 | ASV441  | 0.000316766866185797 | 3W_11 | Firmicutes        | Bacillaceae          | Bacillus               | NA               |
| 356 | ASV620  | 0.000316766866185797 | 3W_11 | Actinobacteriota  | Micrococcaceae       | Glutamicibacter        | NA               |
| 357 | ASV732  | 0.000316766866185797 | 3W_11 | Bacteroidota      | Chitinophagaceae     | Flavitalea             | NA               |
| 358 | ASV625  | 0.000313467211329695 | 3W_11 | Proteobacteria    | Comamonadaceae       | Caenimonas             | NA               |
| 359 | ASV630  | 0.000310167556473593 | 3W_11 | Bacteroidota      | Sphingobacteriaceae  | Pedobacter             | bambusae         |
| 360 | ASV637  | 0.000306867901617491 | 3W_11 | Proteobacteria    | Moraxellaceae        | Alkanindiges           | illinoisensis    |
| 361 | ASV56   | 0.000303568246761389 | 3W_11 | Proteobacteria    | Comamonadaceae       | Rhodofera              | NA               |
| 362 | ASV641  | 0.000303568246761389 | 3W_11 | Actinobacteriota  | Microbacteriaceae    | Marisediminicola       | NA               |
| 363 | ASV568  | 0.000302514546143364 | 3W_8  | Bacteroidota      | Chitinophagaceae     | Sediminibacterium      | NA               |
| 364 | ASV646  | 0.000300268591905287 | 3W_11 | Proteobacteria    | Sphingomonadaceae    | Sphingosinicella       | solii            |
| 365 | ASV649  | 0.000300268591905287 | 3W_11 | Proteobacteria    | Acetobacteraceae     | Rubritepida            | NA               |
| 366 | ASV650  | 0.000300268591905287 | 3W_11 | Actinobacteriota  | Intrasporangiaceae   | Tetrasphaera           | NA               |
| 367 | ASV185  | 0.000299388747972889 | 3B_11 | Actinobacteriota  | Corynebacteriaceae   | Turicella              | otitidis         |
| 368 | ASV911  | 0.000299388747972889 | 3B_11 | Proteobacteria    | Parvularculaceae     | Amphiplicatus          | NA               |
| 369 | ASV667  | 0.000290369627336981 | 3W_11 | Bacteroidota      | Chitinophagaceae     | Dinghuibacter          | NA               |
| 370 | ASV17   | 0.000287069972480879 | 3W_11 | Bacteroidota      | Chitinophagaceae     | Sediminibacterium      | salmonum         |
| 371 | ASV676  | 0.000287069972480879 | 3W_11 | Proteobacteria    | Devosiaceae          | Devosia                | geojensis        |
| 372 | ASV677  | 0.000287069972480879 | 3W_11 | Verrucomicrobiota | Chthoniobacteraceae  | Candidatus Udaeobacter | NA               |
| 373 | ASV696  | 0.000277171007912572 | 3W_11 | Verrucomicrobiota | Opitutaceae          | Diplosphaera           | NA               |
| 374 | ASV211  | 0.000277069397402333 | 3W_8  | Proteobacteria    | Rhodobacteraceae     | Paracoccus             | NA               |
| 375 | ASV73   | 0.000273973659940806 | 3B_8  | Proteobacteria    | Sphingomonadaceae    | Sphingomonas           | NA               |
| 376 | ASV1128 | 0.00027387135305647  | 3W_11 | Proteobacteria    | Alcaligenaceae       | Verticella             | NA               |
| 377 | ASV698  | 0.00027387135305647  | 3W_11 | Myxococcota       | Myxococcaceae        | Corallocooccus         | NA               |
| 378 | ASV973  | 0.00027387135305647  | 3W_11 | Bacteroidota      | Microscillaceae      | Ohtaekwangia           | NA               |
| 379 | ASV710  | 0.000270571698200368 | 3W_11 | Proteobacteria    | Xanthobacteraceae    | Tardiphaga             | NA               |
| 380 | ASV712  | 0.000270571698200368 | 3W_11 | Bacteroidota      | Hymenobacteraceae    | Adhaeribacter          | NA               |
| 381 | ASV715  | 0.000267272043344266 | 3W_11 | Bacteroidota      | Prevotellaceae       | Prevotella             | intermedia       |
| 382 | ASV35   | 0.000265760442406319 | 3W_8  | Actinobacteriota  | Mycobacteriaceae     | Mycobacterium          | NA               |
| 383 | ASV718  | 0.000263972388488164 | 3W_11 | Verrucomicrobiota | Opitutaceae          | Cephaloticooccus       | NA               |
| 384 | ASV724  | 0.000263972388488164 | 3W_11 | Bacteroidota      | Chitinophagaceae     | Terrimonas             | crocea           |
| 385 | ASV86   | 0.000263972388488164 | 3W_11 | Myxococcota       | Myxococcaceae        | P3OB-42                | NA               |
| 386 | ASV639  | 0.000262933203657316 | 3W_8  | Actinobacteriota  | Streptosporangiaceae | Sphaerisporangium      | NA               |
| 387 | ASV738  | 0.000260672733632062 | 3W_11 | Actinobacteriota  | Nakamurellaceae      | Nakamurella            | flavida          |
| 388 | ASV644  | 0.000260105964908313 | 3W_8  | Proteobacteria    | Acetobacteraceae     | Roseomonas             | frigidaquae      |
| 389 | ASV932  | 0.00025737307877596  | 3W_11 | Acidobacteriota   | Vicinambacteraceae   | Luteitalea             | NA               |
| 390 | ASV65   | 0.000254451487410306 | 3W_8  | Proteobacteria    | Beijerinckiaceae     | Bosea                  | NA               |

|     |         |                      |       |                   |                       |                           |                   |
|-----|---------|----------------------|-------|-------------------|-----------------------|---------------------------|-------------------|
| 391 | ASV659  | 0.000254451487410306 | 3W_8  | Actinobacteriota  | Cellulomonadaceae     | Actinotalea               | NA                |
| 392 | ASV716  | 0.000254451487410306 | 3W_8  | Planctomycetota   | Pirellulaceae         | Rhodopirellula            | NA                |
| 393 | ASV713  | 0.000250773769063756 | 3W_11 | Firmicutes        | Family XI             | Finegoldia                | magna             |
| 394 | ASV758  | 0.000250773769063756 | 3W_11 | Bacteroidota      | Flavobacteriaceae     | Flavobacterium            | saccharophilum    |
| 395 | ASV759  | 0.000250773769063756 | 3W_11 | Proteobacteria    | Devosiaceae           | Devosia                   | psychrophila      |
| 396 | ASV13   | 0.000249490623310741 | 3B_11 | Actinobacteriota  | Nocardioideae         | Aeromicrobium             | alkaliterrae      |
| 397 | ASV961  | 0.000248797009912299 | 3W_8  | Actinobacteriota  | Micrococcaceae        | Kocuria                   | NA                |
| 398 | ASV772  | 0.000244174459351552 | 3W_11 | Proteobacteria    | Solimonadaceae        | Panacagrimonas            | NA                |
| 399 | ASV773  | 0.000244174459351552 | 3W_11 | Proteobacteria    | Comamonadaceae        | Mitsuaria                 | NA                |
| 400 | ASV325  | 0.00024087480449545  | 3W_11 | Firmicutes        | Streptococcaceae      | Streptococcus             | NA                |
| 401 | ASV786  | 0.00024087480449545  | 3W_11 | Actinobacteriota  | Solirubrobacteraceae  | Parviterribacter          | NA                |
| 402 | ASV792  | 0.000237575149639348 | 3W_11 | Proteobacteria    | Oxalobacteraceae      | Massilia                  | timonae           |
| 403 | ASV913  | 0.000237575149639348 | 3W_11 | Firmicutes        | Veillonellaceae       | Veillonella               | NA                |
| 404 | ASV121  | 0.000237016092145204 | 3B_11 | Actinobacteriota  | Corynebacteriaceae    | Lawsonella                | clevelandensis    |
| 405 | ASV701  | 0.000234660816167282 | 3W_8  | Actinobacteriota  | Thermomonosporaceae   | Actinoallomurus           | bryophytorum      |
| 406 | ASV814  | 0.000230975839927144 | 3W_11 | Proteobacteria    | Solimonadaceae        | Fontimonas                | NA                |
| 407 | ASV379  | 0.000228699738034846 | 3B_11 | Firmicutes        | Planococcaceae        | Solibacillus              | NA                |
| 408 | ASV818  | 0.000227676185071042 | 3W_11 | Proteobacteria    | Comamonadaceae        | Azohydromonas             | lata              |
| 409 | ASV730  | 0.000226179099920272 | 3W_8  | Actinobacteriota  | Streptosporangiaceae  | Sphaerimonospora          | NA                |
| 410 | ASV22   | 0.000223809468684039 | 3B_8  | Proteobacteria    | Sphingomonadaceae     | Plot4-2H12                | NA                |
| 411 | ASV857  | 0.000221076875358837 | 3W_11 | Bacteroidota      | Microscillaceae       | Flexibacter               | NA                |
| 412 | ASV1190 | 0.000221076875358837 | 3W_11 | Proteobacteria    | Labraceae             | Labrys                    | NA                |
| 413 | ASV838  | 0.000221076875358837 | 3W_11 | Proteobacteria    | Azospirillaceae       | Skermanella               | aerolata          |
| 414 | ASV840  | 0.000221076875358837 | 3W_11 | Actinobacteriota  | Solirubrobacteraceae  | JCM 18997                 | NA                |
| 415 | ASV978  | 0.000220383383924487 | 3B_11 | Planctomycetota   | Phycisphaeraceae      | SM1A02                    | NA                |
| 416 | ASV846  | 0.00021777220502735  | 3W_11 | Bacteroidota      | Saprospiraceae        | Aureispira                | NA                |
| 417 | ASV847  | 0.00021777220502735  | 3W_11 | Verrucomicrobiota | Opitutaceae           | Lacunisphaera             | limnophila        |
| 418 | ASV850  | 0.00021777220502735  | 3W_11 | Myxococcota       | Anaeromyxobacteraceae | Anaeromyxobacter          | NA                |
| 419 | ASV951  | 0.00021777220502735  | 3W_11 | Proteobacteria    | Burkholderiaceae      | Lautropia                 | NA                |
| 420 | ASV865  | 0.000214870144924258 | 3W_8  | Actinobacteriota  | Micrococcaceae        | Micrococcus               | NA                |
| 421 | ASV19   | 0.000214477565646633 | 3W_11 | Proteobacteria    | Xanthobacteraceae     | Afipia                    | NA                |
| 422 | ASV864  | 0.000214477565646633 | 3W_11 | Proteobacteria    | Solimonadaceae        | Hydrocarboniphaga         | daqingensis       |
| 423 | ASV1065 | 0.000214477565646633 | 3W_11 | Bacteroidota      | Spirosomaceae         | Larkinella                | NA                |
| 424 | ASV230  | 0.000212067029814129 | 3B_11 | Proteobacteria    | Sphingomonadaceae     | Sphingorhabdus            | NA                |
| 425 | ASV325  | 0.000212067029814129 | 3B_11 | Firmicutes        | Streptococcaceae      | Streptococcus             | NA                |
| 426 | ASV868  | 0.000211177910790531 | 3W_11 | Bacteroidota      | Cytophagaceae         | Siphonobacter             | NA                |
| 427 | ASV875  | 0.000211177910790531 | 3W_11 | Firmicutes        | Planococcaceae        | Planococcus               | NA                |
| 428 | ASV1092 | 0.000207878255934429 | 3W_11 | Myxococcota       | Polyangiaceae         | Pajarellobacter           | NA                |
| 429 | ASV879  | 0.000207878255934429 | 3W_11 | Bacteroidota      | Porphyromonadaceae    | Porphyromonas             | gingivalis        |
| 430 | ASV882  | 0.000207878255934429 | 3W_11 | Proteobacteria    | Oxalobacteraceae      | Duganella                 | zoogloeoides      |
| 431 | ASV889  | 0.000207878255934429 | 3W_11 | Proteobacteria    | Beijerinckiaceae      | Methylobacterium-Methylor | NA                |
| 432 | ASV53   | 0.000201278946222225 | 3W_11 | Proteobacteria    | Oxalobacteraceae      | Undibacterium             | parvum            |
| 433 | ASV904  | 0.000201278946222225 | 3W_11 | Bacteroidota      | Spirosomaceae         | Larkinella                | terrae            |
| 434 | ASV961  | 0.000201278946222225 | 3W_11 | Actinobacteriota  | Micrococcaceae        | Kocuria                   | NA                |
| 435 | ASV1161 | 0.000199592498648592 | 3B_11 | Verrucomicrobiota | Parachlamydiaceae     | Candidatus Protochlamydia | NA                |
| 436 | ASV901  | 0.000199592498648592 | 3B_11 | Proteobacteria    | Sphingomonadaceae     | DSSF69                    | NA                |
| 437 | ASV729  | 0.000197979291366123 | 3W_11 | Actinobacteriota  | Corynebacteriaceae    | Corynebacterium           | genitalium        |
| 438 | ASV928  | 0.000194679636510021 | 3W_11 | Actinobacteriota  | Micrococcaceae        | Neomicrococcus            | aestuarii         |
| 439 | ASV938  | 0.000191379981653919 | 3W_11 | Proteobacteria    | Sphingomonadaceae     | Novosphingobium           | ginsenosidimutans |

|     |         |                      |       |                   |                      |                    |               |
|-----|---------|----------------------|-------|-------------------|----------------------|--------------------|---------------|
| 440 | ASV939  | 0.000191379981653919 | 3W_11 | Proteobacteria    | Rhodocyclaceae       | Uliginosibacterium | sedimnicola   |
| 441 | ASV943  | 0.000191379981653919 | 3W_11 | Actinobacteriota  | Micrococcaceae       | Yaniella           | NA            |
| 442 | ASV979  | 0.000191379981653919 | 3W_11 | Proteobacteria    | Solimonadaceae       | Hydrocarboniphaga  | NA            |
| 443 | ASV70   | 0.000191276144538234 | 3B_11 | Proteobacteria    | Oxalobacteraceae     | Massilia           | NA            |
| 444 | ASV947  | 0.000188080326797817 | 3W_11 | Proteobacteria    | Rhodanobacteraceae   | Tahibacter         | NA            |
| 445 | ASV1174 | 0.000188080326797817 | 3W_11 | Bacteroidota      | Saprospiraceae       | OLB8               | NA            |
| 446 | ASV852  | 0.000186597757434224 | 3W_8  | Spirochaetota     | Spirochaetaceae      | Spirochaeta        | NA            |
| 447 | ASV853  | 0.000186597757434224 | 3W_8  | Firmicutes        | Paenibacillaceae     | Paenibacillus      | NA            |
| 448 | ASV854  | 0.000186597757434224 | 3W_8  | Firmicutes        | Lactobacillaceae     | Ligilactobacillus  | NA            |
| 449 | ASV1391 | 0.000184780671941715 | 3W_11 | Myxococgota       | Phaselicytidaceae    | Phaselicystis      | NA            |
| 450 | ASV956  | 0.000184780671941715 | 3W_11 | Proteobacteria    | Oxalobacteraceae     | Oxalibacterium     | NA            |
| 451 | ASV958  | 0.000184780671941715 | 3W_11 | Proteobacteria    | Sphingomonadaceae    | Polymorphobacter   | NA            |
| 452 | ASV680  | 0.000183770518685221 | 3W_8  | Actinobacteriota  | Bifidobacteriaceae   | Bifidobacterium    | NA            |
| 453 | ASV1135 | 0.000181481017085613 | 3W_11 | Verrucomicrobiota | Terrimicrobiaceae    | Terrimicrobium     | NA            |
| 454 | ASV149  | 0.000181481017085613 | 3W_11 | Actinobacteriota  | Micrococcaceae       | Nesterenkonia      | NA            |
| 455 | ASV63   | 0.000180943279936217 | 3W_8  | Proteobacteria    | Sphingomonadaceae    | Sphingomonas       | sanxanigenens |
| 456 | ASV970  | 0.000178181362229511 | 3W_11 | Proteobacteria    | Alcaligenaceae       | Parvibium          | NA            |
| 457 | ASV972  | 0.000178181362229511 | 3W_11 | Actinobacteriota  | Micromonosporaceae   | Actinoplanes       | digitatis     |
| 458 | ASV185  | 0.000178116041187214 | 3W_8  | Actinobacteriota  | Corynebacteriaceae   | Turicella          | otitidis      |
| 459 | ASV899  | 0.000175288802438211 | 3W_8  | Proteobacteria    | Comamonadaceae       | Malikia            | NA            |
| 460 | ASV980  | 0.000174881707373409 | 3W_11 | Proteobacteria    | Erwiniaceae          | Pantoea            | NA            |
| 461 | ASV985  | 0.000174881707373409 | 3W_11 | Proteobacteria    | Acidithiobacillaceae | KCM-B-112          | NA            |
| 462 | ASV992  | 0.000174881707373409 | 3W_11 | Actinobacteriota  | Kineosporiaceae      | Quadrisphaera      | NA            |
| 463 | ASV83   | 0.000174643436317518 | 3B_11 | Proteobacteria    | Moraxellaceae        | Acinetobacter      | NA            |
| 464 | ASV1005 | 0.000171582052517307 | 3W_11 | Bacteroidota      | Sphingobacteriaceae  | Solitalea          | NA            |
| 465 | ASV999  | 0.000171582052517307 | 3W_11 | Actinobacteriota  | Microbacteriaceae    | Cryobacterium      | NA            |
| 466 | ASV1015 | 0.000168282397661205 | 3W_11 | Proteobacteria    | Xanthobacteraceae    | Pseudorhodoplanes  | NA            |
| 467 | ASV1260 | 0.000168282397661205 | 3W_11 | Firmicutes        | Lactobacillaceae     | Lactobacillus      | NA            |
| 468 | ASV33   | 0.000165927709541615 | 3B_8  | Proteobacteria    | Comamonadaceae       | Rhizobacter        | NA            |
| 469 | ASV1018 | 0.000164982742805103 | 3W_11 | Firmicutes        | Carnobacteriaceae    | Desemzia           | incerta       |
| 470 | ASV1019 | 0.000164982742805103 | 3W_11 | Proteobacteria    | Oxalobacteraceae     | Janthinobacterium  | NA            |
| 471 | ASV1031 | 0.000161683087949001 | 3W_11 | Proteobacteria    | Acetobacteraceae     | Rhodovastum        | NA            |
| 472 | ASV1042 | 0.000158383433092898 | 3W_11 | Bacteroidota      | Weeksellaceae        | Empedobacter       | NA            |
| 473 | ASV1043 | 0.000158383433092898 | 3W_11 | Proteobacteria    | Comamonadaceae       | Hylemonella        | NA            |
| 474 | ASV993  | 0.000158383433092898 | 3W_11 | Bacteroidota      | Dysgonomonadaceae    | Proteiniphilum     | acetatigenes  |
| 475 | ASV16   | 0.000158210141655959 | 3B_8  | Proteobacteria    | Comamonadaceae       | Limnohabitans      | NA            |
| 476 | ASV865  | 0.000158010728096802 | 3B_11 | Actinobacteriota  | Micrococcaceae       | Micrococcus        | NA            |
| 477 | ASV36   | 0.00015435135771313  | 3B_8  | Proteobacteria    | Sphingomonadaceae    | Novosphingobium    | NA            |
| 478 | ASV1171 | 0.000153852551041623 | 3B_11 | Actinobacteriota  | Micrococcaceae       | Citricoccus        | NA            |
| 479 | ASV1064 | 0.000151784123380694 | 3W_11 | Proteobacteria    | Comamonadaceae       | Methylibium        | NA            |
| 480 | ASV1066 | 0.000151784123380694 | 3W_11 | Proteobacteria    | Rhizobiaceae         | Shinella           | NA            |
| 481 | ASV1069 | 0.000151784123380694 | 3W_11 | Bacteroidota      | Saprospiraceae       | Lewinella          | NA            |
| 482 | ASV1096 | 0.000151784123380694 | 3W_11 | Verrucomicrobiota | Pedosphaeraceae      | SH3-11             | NA            |
| 483 | ASV760  | 0.000151784123380694 | 3W_11 | Firmicutes        | Bacillaceae          | Anoxybacillus      | NA            |
| 484 | ASV994  | 0.00014984365369718  | 3W_8  | Firmicutes        | Ruminococcaceae      | Ruminococcus       | NA            |
| 485 | ASV1072 | 0.000148484468524592 | 3W_11 | Actinobacteriota  | Solirubrobacteraceae | Solirubrobacter    | taibaiensis   |
| 486 | ASV1301 | 0.000148484468524592 | 3W_11 | Actinobacteriota  | Micromonosporaceae   | Catenuloplanes     | NA            |
| 487 | ASV1363 | 0.000148484468524592 | 3W_11 | Proteobacteria    | Defluviococcaceae    | Defluviococcus     | NA            |
| 488 | ASV1087 | 0.00014518481366849  | 3W_11 | Chloroflexi       | Caldilineaceae       | Litorilinea        | NA            |

|     |         |                      |       |                   |                      |                           |                |
|-----|---------|----------------------|-------|-------------------|----------------------|---------------------------|----------------|
| 489 | ASV1308 | 0.00014518481366849  | 3W_11 | Bacteroidota      | Microscillaceae      | OLB12                     | NA             |
| 490 | ASV1393 | 0.00014518481366849  | 3W_11 | Proteobacteria    | Beijerinckiaceae     | Psychroglacielcola        | NA             |
| 491 | ASV912  | 0.00014518481366849  | 3W_11 | Actinobacteriota  | Corynebacteriaceae   | Corynebacterium           | kroppenstedtii |
| 492 | ASV83   | 0.000144189176199173 | 3W_8  | Proteobacteria    | Moraxellaceae        | Acinetobacter             | NA             |
| 493 | ASV1105 | 0.000141885158812388 | 3W_11 | Actinobacteriota  | Microtrichaceae      | IMCC26207                 | NA             |
| 494 | ASV1106 | 0.000141885158812388 | 3W_11 | Proteobacteria    | Comamonadaceae       | Comamonas                 | jiangduensis   |
| 495 | ASV936  | 0.00014136193745017  | 3W_8  | Verrucomicrobiota | Parachlamydiaceae    | Neochlamydia              | NA             |
| 496 | ASV1115 | 0.000138585503956286 | 3W_11 | Gemmatimonadota   | Longimicrobiaceae    | Longimicrobium            | NA             |
| 497 | ASV1116 | 0.000138585503956286 | 3W_11 | Actinobacteriota  | Cellulomonadaceae    | Cellulomonas              | NA             |
| 498 | ASV1119 | 0.000138585503956286 | 3W_11 | Proteobacteria    | Enterobacteriaceae   | Escherichia-Shigella      | NA             |
| 499 | ASV1132 | 0.000135285849100184 | 3W_11 | Actinobacteriota  | Nocardiodaceae       | Aeromicrobium             | choanae        |
| 500 | ASV568  | 0.000135285849100184 | 3W_11 | Bacteroidota      | Chitinophagaceae     | Sediminibacterium         | NA             |
| 501 | ASV935  | 0.00013288022120316  | 3W_8  | Firmicutes        | Carnobacteriaceae    | Granulicatella            | NA             |
| 502 | ASV1142 | 0.000131986194244082 | 3W_11 | Proteobacteria    | Rhizobiaceae         | Pseudorhizobium           | NA             |
| 503 | ASV1161 | 0.000131986194244082 | 3W_11 | Verrucomicrobiota | Parachlamydiaceae    | Candidatus Protochlamydia | NA             |
| 504 | ASV1154 | 0.00012868653938798  | 3W_11 | Proteobacteria    | Cellvibrionaceae     | Cellvibrio                | fulvus         |
| 505 | ASV1669 | 0.000125386884531878 | 3W_11 | Gemmatimonadota   | Gemmatimonadaceae    | Roseisolibacter           | NA             |
| 506 | ASV680  | 0.000125386884531878 | 3W_11 | Actinobacteriota  | Bifidobacteriaceae   | Bifidobacterium           | NA             |
| 507 | ASV1165 | 0.000125386884531878 | 3W_11 | Proteobacteria    | Rhodobacteraceae     | Tabrizicola               | NA             |
| 508 | ASV1221 | 0.000125386884531878 | 3W_11 | Abditibacteriota  | Abditibacteriaceae   | Abditibacterium           | NA             |
| 509 | ASV212  | 0.00012474531165537  | 3B_11 | Proteobacteria    | Halomonadaceae       | Halomonas                 | NA             |
| 510 | ASV1095 | 0.00012439850495615  | 3W_8  | Chloroflexi       | Anaerolineaceae      | Levilinea                 | saccharolytica |
| 511 | ASV186  | 0.000123481086170504 | 3B_8  | Proteobacteria    | Sphingomonadaceae    | Porphyrobacter            | NA             |
| 512 | ASV1178 | 0.000122087229675776 | 3W_11 | Proteobacteria    | Pseudomonadaceae     | Pseudomonas               | oleovorans     |
| 513 | ASV1179 | 0.000122087229675776 | 3W_11 | Actinobacteriota  | Solirubrobacteraceae | Conexibacter              | NA             |
| 514 | ASV1183 | 0.000122087229675776 | 3W_11 | Fibrobacterota    | Fibrobacteraceae     | possible genus 04         | NA             |
| 515 | ASV1187 | 0.000122087229675776 | 3W_11 | Proteobacteria    | Burkholderiaceae     | Limnobacter               | NA             |
| 516 | ASV853  | 0.000122087229675776 | 3W_11 | Firmicutes        | Paenibacillaceae     | Paenibacillus             | NA             |
| 517 | ASV978  | 0.000122087229675776 | 3W_11 | Planctomycetota   | Phycisphaeraceae     | SM1A02                    | NA             |
| 518 | ASV361  | 0.000120587134600191 | 3B_11 | Actinobacteriota  | Corynebacteriaceae   | Corynebacterium           | suicordis      |
| 519 | ASV79   | 0.000120587134600191 | 3B_11 | Actinobacteriota  | Corynebacteriaceae   | Corynebacterium           | NA             |
| 520 | ASV1195 | 0.000118787574819674 | 3W_11 | Proteobacteria    | Sphingomonadaceae    | Sphingomonas              | kaistensis     |
| 521 | ASV1335 | 0.000116428957545012 | 3B_11 | Firmicutes        | Bacillaceae          | Anaerobacillus            | NA             |
| 522 | ASV1094 | 0.000115487919963572 | 3W_11 | Actinobacteriota  | Dermabacteraceae     | Brachybacterium           | NA             |
| 523 | ASV1208 | 0.000115487919963572 | 3W_11 | Proteobacteria    | Acetobacteraceae     | Craurococcus-Caldovatus   | NA             |
| 524 | ASV234  | 0.000112270780489833 | 3B_11 | Firmicutes        | Bacillaceae          | Ornithinibacillus         | NA             |
| 525 | ASV109  | 0.00011218826510747  | 3W_11 | Verrucomicrobiota | Omnitrophaceae       | Candidatus Omnitrophus    | NA             |
| 526 | ASV1214 | 0.00011218826510747  | 3W_11 | Proteobacteria    | Alcaligenaceae       | Eoetvoesia                | caeni          |
| 527 | ASV1230 | 0.00011218826510747  | 3W_11 | Proteobacteria    | Rhodocyclaceae       | Sulfuritalea              | NA             |
| 528 | ASV1247 | 0.000108888610251368 | 3W_11 | Cyanobacteria     | Coleofasciculaceae   | Wilmottia Ant-Ph58        | NA             |
| 529 | ASV1544 | 0.000108888610251368 | 3W_11 | Proteobacteria    | Rhizobiaceae         | Pseudochrobactrum         | NA             |
| 530 | ASV268  | 0.000108112603434654 | 3B_11 | Proteobacteria    | Moraxellaceae        | Acinetobacter             | lwoffii        |
| 531 | ASV1170 | 0.000107435072462129 | 3W_8  | Firmicutes        | Lachnospiraceae      | Lachnoanaerobaculum       | NA             |
| 532 | ASV1251 | 0.000105588955395266 | 3W_11 | Armatimonadota    | Fimbriimonadaceae    | Fimbriimonas              | NA             |
| 533 | ASV1257 | 0.000105588955395266 | 3W_11 | Actinobacteriota  | Kineosporiaceae      | Kineosporia               | NA             |
| 534 | ASV1268 | 0.000105588955395266 | 3W_11 | Proteobacteria    | Sphingomonadaceae    | Parablastomonas           | NA             |
| 535 | ASV1277 | 0.000102289300539164 | 3W_11 | Bacteroidota      | Hymenobacteraceae    | Hymenobacter              | psychrophilus  |
| 536 | ASV1286 | 0.000102289300539164 | 3W_11 | Proteobacteria    | Rhizobiaceae         | Pseudaminobacter          | NA             |
| 537 | ASV1291 | 0.000102289300539164 | 3W_11 | Firmicutes        | Lachnospiraceae      | Oribacterium              | sinus          |

|     |         |                      |       |                   |                        |                             |                |
|-----|---------|----------------------|-------|-------------------|------------------------|-----------------------------|----------------|
| 538 | ASV467  | 0.000102289300539164 | 3W_11 | Proteobacteria    | Sphingomonadaceae      | Blastomonas                 | NA             |
| 539 | ASV65   | 0.000100328382513535 | 3B_8  | Proteobacteria    | Beijerinckiaceae       | Bosea                       | NA             |
| 540 | ASV1296 | 9.89896456830616e-05 | 3W_11 | Bacteroidota      | Cytophagaceae          | Rhodocytophaga              | NA             |
| 541 | ASV1299 | 9.89896456830616e-05 | 3W_11 | Actinobacteriota  | Actinomycetaceae       | Actinomyces                 | NA             |
| 542 | ASV1304 | 9.89896456830616e-05 | 3W_11 | Proteobacteria    | Sphingomonadaceae      | Sandaracinobacter           | NA             |
| 543 | ASV1306 | 9.89896456830616e-05 | 3W_11 | Verrucomicrobiota | Parachlamydiaceae      | Candidatus Metachlamydia    | NA             |
| 544 | ASV1310 | 9.89896456830616e-05 | 3W_11 | Cyanobacteria     | Chroococciopsaceae     | Aliterella                  | NA             |
| 545 | ASV1583 | 9.89896456830616e-05 | 3W_11 | Planctomycetota   | Isosphaeraceae         | Paludisphaera               | NA             |
| 546 | ASV1421 | 9.56380722691172e-05 | 3B_11 | Proteobacteria    | Pseudoalteromonadaceae | Pseudoalteromonas           | NA             |
| 547 | ASV1337 | 9.23903359708574e-05 | 3W_11 | Firmicutes        | Thermicanaceae         | Thermicanus                 | NA             |
| 548 | ASV1346 | 9.23903359708574e-05 | 3W_11 | Proteobacteria    | Nitrosomonadaceae      | Nitrosomonas                | NA             |
| 549 | ASV1450 | 9.23903359708574e-05 | 3W_11 | Proteobacteria    | Paracaedibacteraceae   | Candidatus Paracaedibacter  | NA             |
| 550 | ASV1607 | 9.23903359708574e-05 | 3W_11 | Chloroflexi       | A4b                    | OLB13                       | NA             |
| 551 | ASV333  | 9.23903359708574e-05 | 3W_11 | Proteobacteria    | Oxalobacteraceae       | Undibacterium               | NA             |
| 552 | ASV1366 | 8.57910262586533e-05 | 3W_11 | Proteobacteria    | Sphingomonadaceae      | Sphingobium                 | sufflavum      |
| 553 | ASV1369 | 8.57910262586533e-05 | 3W_11 | Proteobacteria    | Nitrosomonadaceae      | oc32                        | NA             |
| 554 | ASV1371 | 8.57910262586533e-05 | 3W_11 | Proteobacteria    | Caedibacteraceae       | Caedibacter                 | NA             |
| 555 | ASV1315 | 8.48171624701019e-05 | 3W_8  | Firmicutes        | Paenibacillaceae       | Ammonibacillus              | agariperforans |
| 556 | ASV760  | 8.48171624701019e-05 | 3W_8  | Firmicutes        | Bacillaceae            | Anoxybacillus               | NA             |
| 557 | ASV1423 | 8.31635411035802e-05 | 3B_11 | Actinobacteriota  | Brevibacteriaceae      | Brevibacterium              | NA             |
| 558 | ASV1505 | 8.31635411035802e-05 | 3B_11 | Proteobacteria    | Oxalobacteraceae       | Actimicrobium               | NA             |
| 559 | ASV1379 | 8.24913714025513e-05 | 3W_11 | Patescibacteria   | Saccharimonadaceae     | TM7a                        | NA             |
| 560 | ASV1385 | 8.24913714025513e-05 | 3W_11 | Proteobacteria    | Rhodobacteraceae       | Cereibacter                 | NA             |
| 561 | ASV93   | 8.24913714025513e-05 | 3W_11 | Proteobacteria    | Xanthobacteraceae      | Rhodoplanes                 | NA             |
| 562 | ASV70   | 8.19899237210986e-05 | 3W_8  | Proteobacteria    | Oxalobacteraceae       | Massilia                    | NA             |
| 563 | ASV1403 | 7.91917165464492e-05 | 3W_11 | Planctomycetota   | Gemmataceae            | Telmatocola                 | NA             |
| 564 | ASV1410 | 7.91917165464492e-05 | 3W_11 | Proteobacteria    | Moraxellaceae          | Alkanindiges                | NA             |
| 565 | ASV1417 | 7.91917165464492e-05 | 3W_11 | Actinobacteriota  | Micromonosporaceae     | Virgisporangium             | NA             |
| 566 | ASV461  | 7.90053640484012e-05 | 3B_11 | Firmicutes        | Family XI              | Peptoniphilus               | NA             |
| 567 | ASV936  | 7.90053640484012e-05 | 3B_11 | Verrucomicrobiota | Parachlamydiaceae      | Neochlamydia                | NA             |
| 568 | ASV230  | 7.71756788565651e-05 | 3B_8  | Proteobacteria    | Sphingomonadaceae      | Sphingorhabdus              | NA             |
| 569 | ASV82   | 7.71756788565651e-05 | 3B_8  | Proteobacteria    | Caulobacteraceae       | Brevundimonas               | NA             |
| 570 | ASV1425 | 7.58920616903472e-05 | 3W_11 | Proteobacteria    | Rhizobiaceae           | Neorhizobium                | NA             |
| 571 | ASV1449 | 7.58920616903472e-05 | 3W_11 | Proteobacteria    | Acetobacteraceae       | Roseomonas                  | aquatica       |
| 572 | ASV1527 | 7.58920616903472e-05 | 3W_11 | Proteobacteria    | Beijerinckiaceae       | 1174-901-12                 | NA             |
| 573 | ASV961  | 7.48471869932222e-05 | 3B_11 | Actinobacteriota  | Micrococcaceae         | Kocuria                     | NA             |
| 574 | ASV1467 | 7.25924068342451e-05 | 3W_11 | Proteobacteria    | Xanthomonadaceae       | Lysobacter                  | dokdonensis    |
| 575 | ASV1470 | 7.25924068342451e-05 | 3W_11 | Actinobacteriota  | Micromonosporaceae     | Actinoplanes                | philippinensis |
| 576 | ASV865  | 7.25924068342451e-05 | 3W_11 | Actinobacteriota  | Micrococcaceae         | Micrococcus                 | NA             |
| 577 | ASV1401 | 7.0680968725085e-05  | 3W_8  | Firmicutes        | Christensenellaceae    | Christensenellaceae R-7 grc | NA             |
| 578 | ASV293  | 7.0680968725085e-05  | 3W_8  | Proteobacteria    | Sphingomonadaceae      | Altererythrobacter          | NA             |
| 579 | ASV1401 | 6.92927519781431e-05 | 3W_11 | Firmicutes        | Christensenellaceae    | Christensenellaceae R-7 grc | NA             |
| 580 | ASV1480 | 6.92927519781431e-05 | 3W_11 | Proteobacteria    | Sphingomonadaceae      | Sphingomonas                | hunanensis     |
| 581 | ASV1485 | 6.92927519781431e-05 | 3W_11 | Proteobacteria    | Rickettsiaceae         | Candidatus Cryptoprodotis   | NA             |
| 582 | ASV1487 | 6.92927519781431e-05 | 3W_11 | Actinobacteriota  | Nocardioideaceae       | Nocardioides                | ginkgobilobae  |
| 583 | ASV1491 | 6.92927519781431e-05 | 3W_11 | Proteobacteria    | Rhizobiaceae           | Aliihoeflea                 | aestuarii      |
| 584 | ASV1492 | 6.92927519781431e-05 | 3W_11 | Proteobacteria    | Rhodobacteraceae       | Amaricoccus                 | kaplicensis    |
| 585 | ASV1574 | 6.78537299760816e-05 | 3W_8  | Bacteroidota      | Prevotellaceae         | Prevotella_7                | NA             |
| 586 | ASV1212 | 6.65308328828641e-05 | 3B_11 | Proteobacteria    | Beijerinckiaceae       | Methylocella                | NA             |

|     |         |                      |       |                  |                                |                             |                  |
|-----|---------|----------------------|-------|------------------|--------------------------------|-----------------------------|------------------|
| 587 | ASV912  | 6.65308328828641e-05 | 3B_11 | Actinobacteriota | Corynebacteriaceae             | Corynebacterium             | kroppenstedtii   |
| 588 | ASV1512 | 6.5993097122041e-05  | 3W_11 | Proteobacteria   | Devosiaceae                    | Arsenicitalea               | NA               |
| 589 | ASV1453 | 6.50264912270782e-05 | 3W_8  | Chloroflexi      | Anaerolineaceae                | Anaerolinea                 | NA               |
| 590 | ASV441  | 6.50264912270782e-05 | 3W_8  | Firmicutes       | Bacillaceae                    | Bacillus                    | NA               |
| 591 | ASV1547 | 6.2693442265939e-05  | 3W_11 | Firmicutes       | Planococcaceae                 | Domibacillus                | NA               |
| 592 | ASV1556 | 6.2693442265939e-05  | 3W_11 | Bacteroidota     | Weeksellaceae                  | Moheibacter                 | sediminis        |
| 593 | ASV1200 | 5.93937874098369e-05 | 3W_11 | Firmicutes       | Ruminococcaceae                | Paludicola                  | NA               |
| 594 | ASV1212 | 5.93937874098369e-05 | 3W_11 | Proteobacteria   | Bejerinckiaceae                | Methylocella                | NA               |
| 595 | ASV1562 | 5.93937874098369e-05 | 3W_11 | Proteobacteria   | Hydrogenophilaceae             | Tepidiphilus                | succinatimandens |
| 596 | ASV1569 | 5.93937874098369e-05 | 3W_11 | Bacteroidota     | Prevotellaceae                 | Prevotella_7                | melaninogenica   |
| 597 | ASV534  | 5.93937874098369e-05 | 3W_11 | Chloroflexi      | Anaerolineaceae                | Anaerolineaceae UCG-001     | NA               |
| 598 | ASV1504 | 5.93720137290714e-05 | 3W_8  | Proteobacteria   | Dongiaceae                     | Dongia                      | NA               |
| 599 | ASV1535 | 5.6544774980068e-05  | 3W_8  | Proteobacteria   | Neisseriaceae                  | Neisseria                   | NA               |
| 600 | ASV729  | 5.6544774980068e-05  | 3W_8  | Actinobacteriota | Corynebacteriaceae             | Corynebacterium             | genitium         |
| 601 | ASV142  | 5.60941325537349e-05 | 3W_11 | Bacteroidota     | Sphingobacteriaceae            | Sphingobacterium            | NA               |
| 602 | ASV1579 | 5.60941325537349e-05 | 3W_11 | Proteobacteria   | Puniceispirillales Incertae Se | Constrictibacter            | NA               |
| 603 | ASV1585 | 5.60941325537349e-05 | 3W_11 | Firmicutes       | Bacillaceae                    | Pseudograticibacillus       | NA               |
| 604 | ASV1586 | 5.60941325537349e-05 | 3W_11 | Bacteroidota     | Spirosomaceae                  | Spirosoma                   | NA               |
| 605 | ASV1595 | 5.60941325537349e-05 | 3W_11 | Proteobacteria   | Rhizobiales Incertae Sedis     | Alsobacter                  | metallidurans    |
| 606 | ASV1691 | 5.40563017173271e-05 | 3B_11 | Firmicutes       | Family XI                      | Anaerococcus                | NA               |
| 607 | ASV1618 | 5.27944776976328e-05 | 3W_11 | Proteobacteria   | Sphingomonadaceae              | Sphingorhabdus              | wooponensis      |
| 608 | ASV1200 | 5.08902974820612e-05 | 3W_8  | Firmicutes       | Ruminococcaceae                | Paludicola                  | NA               |
| 609 | ASV1572 | 5.08902974820612e-05 | 3W_8  | Firmicutes       | Lachnospiraceae                | Mobilitalea                 | NA               |
| 610 | ASV1573 | 5.08902974820612e-05 | 3W_8  | Proteobacteria   | Burkholderiaceae               | Ralstonia                   | NA               |
| 611 | ASV1633 | 4.94948228415308e-05 | 3W_11 | Planctomycetota  | Rubinisphaeraceae              | Planctomicrobium            | NA               |
| 612 | ASV1635 | 4.94948228415308e-05 | 3W_11 | Actinobacteriota | Dietziaceae                    | Dietzia                     | NA               |
| 613 | ASV1636 | 4.94948228415308e-05 | 3W_11 | Actinobacteriota | Micromonosporaceae             | Actinoplanes                | sarveparensis    |
| 614 | ASV1637 | 4.94948228415308e-05 | 3W_11 | Firmicutes       | Clostridiaceae                 | Clostridium sensu stricto 1 | butyricum        |
| 615 | ASV125  | 4.63054073139391e-05 | 3B_8  | Proteobacteria   | Nitrosomonadaceae              | MND1                        | NA               |
| 616 | ASV1670 | 4.61951679854287e-05 | 3W_11 | Planctomycetota  | Isosphaeraceae                 | Aquisphaera                 | NA               |
| 617 | ASV1672 | 4.61951679854287e-05 | 3W_11 | Actinobacteriota | Illumatobacteraceae            | CL500-29 marine group       | NA               |
| 618 | ASV1674 | 4.61951679854287e-05 | 3W_11 | Bacteroidota     | Saprospiraceae                 | Haliscomenobacter           | NA               |
| 619 | ASV1682 | 4.61951679854287e-05 | 3W_11 | Proteobacteria   | Porticoccaceae                 | C1-B045                     | NA               |
| 620 | ASV1684 | 4.61951679854287e-05 | 3W_11 | Proteobacteria   | Rhodobacteraceae               | Amaricoccus                 | tamworthensis    |
| 621 | ASV1686 | 4.61951679854287e-05 | 3W_11 | Firmicutes       | Gemellaceae                    | Gemella                     | NA               |
| 622 | ASV1688 | 4.61951679854287e-05 | 3W_11 | Bacteroidota     | Saprospiraceae                 | Phaeodactylibacter          | NA               |
| 623 | ASV2    | 4.24466233711108e-05 | 3B_8  | Proteobacteria   | Solimonadaceae                 | Polycyclovorans             | NA               |
| 624 | ASV1371 | 4.2408581235051e-05  | 3W_8  | Proteobacteria   | Caedibacteraceae               | Caedibacter                 | NA               |
| 625 | ASV150  | 4.15817705517901e-05 | 3B_11 | Bacteroidota     | Sphingobacteriaceae            | Pedobacter                  | NA               |
| 626 | ASV365  | 4.15817705517901e-05 | 3B_11 | Actinobacteriota | Micrococcaceae                 | Paenarthrobacter            | NA               |
| 627 | ASV1724 | 3.95958582732246e-05 | 3W_11 | Actinobacteriota | Streptosporangiales Incertae   | Motilibacter                | NA               |
| 628 | ASV1741 | 3.95958582732246e-05 | 3W_11 | Actinobacteriota | Rubrobacteriaceae              | Rubrobacter                 | NA               |
| 629 | ASV1747 | 3.95958582732246e-05 | 3W_11 | Proteobacteria   | Caulobacteraceae               | PMMR1                       | NA               |
| 630 | ASV45   | 3.95958582732246e-05 | 3W_11 | Proteobacteria   | Sphingomonadaceae              | Sphingomonas                | koreensis        |
| 631 | ASV935  | 3.95958582732246e-05 | 3W_11 | Firmicutes       | Carnobacteriaceae              | Granulicatella              | NA               |
| 632 | ASV186  | 3.95813424860476e-05 | 3W_8  | Proteobacteria   | Sphingomonadaceae              | Porphyrobacter              | NA               |
| 633 | ASV1787 | 3.85878394282826e-05 | 3B_8  | Proteobacteria   | Methylophilaceae               | Methylophilus               | NA               |
| 634 | ASV1818 | 3.74235934966111e-05 | 3B_11 | Firmicutes       | Staphylococcaceae              | Jeotgalicoccus              | NA               |
| 635 | ASV300  | 3.74235934966111e-05 | 3B_11 | Proteobacteria   | Xanthobacteraceae              | Rhodopseudomonas            | NA               |

|     |         |                      |       |                  |                            |                           |                |
|-----|---------|----------------------|-------|------------------|----------------------------|---------------------------|----------------|
| 636 | ASV84   | 3.74235934966111e-05 | 3B_11 | Proteobacteria   | Comamonadaceae             | Hydrogenophaga            | NA             |
| 637 | ASV901  | 3.67541037370442e-05 | 3W_8  | Proteobacteria   | Sphingomonadaceae          | DSSF69                    | NA             |
| 638 | ASV1761 | 3.62962034171226e-05 | 3W_11 | Armatimonadota   | Armatimonadaceae           | Armatimonas               | NA             |
| 639 | ASV1769 | 3.62962034171226e-05 | 3W_11 | Bacteroidota     | Sphingobacteriaceae        | Pedobacter                | lignilitoris   |
| 640 | ASV312  | 3.39268649880408e-05 | 3W_8  | Proteobacteria   | Comamonadaceae             | Aquabacterium             | NA             |
| 641 | ASV379  | 3.39268649880408e-05 | 3W_8  | Firmicutes       | Planococcaceae             | Solibacillus              | NA             |
| 642 | ASV1840 | 3.32654164414321e-05 | 3B_11 | Actinobacteriota | Corynebacteriaceae         | Corynebacterium           | jeikeium       |
| 643 | ASV1811 | 3.29965485610205e-05 | 3W_11 | Bacteroidota     | Chitinophagaceae           | Chitinophaga              | NA             |
| 644 | ASV1780 | 3.10996262390374e-05 | 3W_8  | Proteobacteria   | Rhodocyclaceae             | Thauera                   | NA             |
| 645 | ASV57   | 3.10996262390374e-05 | 3W_8  | Bacteroidota     | Cyclobacteriaceae          | Algoriphagus              | NA             |
| 646 | ASV1821 | 2.96968937049185e-05 | 3W_11 | Actinobacteriota | Gaiellaceae                | Gaiella                   | NA             |
| 647 | ASV1828 | 2.96968937049185e-05 | 3W_11 | Actinobacteriota | Micromonosporaceae         | Actinoplanes              | atraurantiacus |
| 648 | ASV1835 | 2.96968937049185e-05 | 3W_11 | Actinobacteriota | Frankiaceae                | Jatrophihabitans          | NA             |
| 649 | ASV1879 | 2.91072393862531e-05 | 3B_11 | Bacteroidota     | Hymenobacteraceae          | Hymenobacter              | NA             |
| 650 | ASV913  | 2.91072393862531e-05 | 3B_11 | Firmicutes       | Veillonellaceae            | Veillonella               | NA             |
| 651 | ASV1815 | 2.8272387490034e-05  | 3W_8  | Bacteroidota     | Paludibacteraceae          | Paludibacter              | NA             |
| 652 | ASV26   | 2.8272387490034e-05  | 3W_8  | Proteobacteria   | Devosiaceae                | Devosia                   | NA             |
| 653 | ASV138  | 2.70114875997978e-05 | 3B_8  | Firmicutes       | Planococcaceae             | Planomicrobium            | NA             |
| 654 | ASV185  | 2.70114875997978e-05 | 3B_8  | Actinobacteriota | Corynebacteriaceae         | Turicella                 | otitidis       |
| 655 | ASV1881 | 2.70114875997978e-05 | 3B_8  | Bacteroidota     | Prevotellaceae             | Prevotella                | timonensis     |
| 656 | ASV71   | 2.70114875997978e-05 | 3B_8  | Proteobacteria   | Ferrovibrionaceae          | Ferrovibrio               | NA             |
| 657 | ASV1574 | 2.63972388488164e-05 | 3W_11 | Bacteroidota     | Prevotellaceae             | Prevotella_7              | NA             |
| 658 | ASV1851 | 2.63972388488164e-05 | 3W_11 | Bacteroidota     | Chitinophagaceae           | Aurantisolimonas          | NA             |
| 659 | ASV1853 | 2.63972388488164e-05 | 3W_11 | Sumerlaeota      | Sumerlaeaceae              | Sumerlaea                 | NA             |
| 660 | ASV1863 | 2.63972388488164e-05 | 3W_11 | Firmicutes       | Peptostreptococcaceae      | Romboutsia                | NA             |
| 661 | ASV1865 | 2.63972388488164e-05 | 3W_11 | Cyanobacteria    | Nostocaceae                | Calothrix PCC-6303        | NA             |
| 662 | ASV1868 | 2.63972388488164e-05 | 3W_11 | Proteobacteria   | Rhizobiales Incertae Sedis | Bauldia                   | NA             |
| 663 | ASV1094 | 2.54451487410306e-05 | 3W_8  | Actinobacteriota | Dermabacteraceae           | Brachybacterium           | NA             |
| 664 | ASV1839 | 2.54451487410306e-05 | 3W_8  | Firmicutes       | Planococcaceae             | Lysinibacillus            | NA             |
| 665 | ASV300  | 2.31527036569695e-05 | 3B_8  | Proteobacteria   | Xanthobacteraceae          | Rhodopseudomonas          | NA             |
| 666 | ASV1888 | 2.30975839927144e-05 | 3W_11 | Proteobacteria   | Xanthomonadaceae           | Luteimonas                | terricola      |
| 667 | ASV1892 | 2.30975839927144e-05 | 3W_11 | Deinococcota     | Deinococcaceae             | Deinobacterium            | NA             |
| 668 | ASV1906 | 2.30975839927144e-05 | 3W_11 | Proteobacteria   | Nitrosomonadaceae          | Nitrosomonas              | oligotropha    |
| 669 | ASV1690 | 2.26179099920272e-05 | 3W_8  | Proteobacteria   | Xanthomonadaceae           | Pseudoxanthomonas         | taiwanensis    |
| 670 | ASV1875 | 2.26179099920272e-05 | 3W_8  | Proteobacteria   | Xanthomonadaceae           | Stenotrophomonas          | maltophilia    |
| 671 | ASV188  | 2.26179099920272e-05 | 3W_8  | Bdellovibrionota | Bacteriovoracaceae         | Peredibacter              | NA             |
| 672 | ASV1941 | 2.0790885275895e-05  | 3B_11 | Firmicutes       | Thermoactinomycetaceae     | Thermoactinomyces         | vulgaris       |
| 673 | ASV713  | 2.0790885275895e-05  | 3B_11 | Firmicutes       | Family XI                  | Finegoldia                | magna          |
| 674 | ASV1690 | 1.97979291366123e-05 | 3W_11 | Proteobacteria   | Xanthomonadaceae           | Pseudoxanthomonas         | taiwanensis    |
| 675 | ASV1927 | 1.97979291366123e-05 | 3W_11 | Bacteroidota     | Chitinophagaceae           | Cnuella                   | NA             |
| 676 | ASV257  | 1.97979291366123e-05 | 3W_11 | Proteobacteria   | Unknown Family             | Candidatus Ovatusbacter   | NA             |
| 677 | ASV1600 | 1.97906712430238e-05 | 3W_8  | Proteobacteria   | Pasteurellaceae            | Haemophilus               | NA             |
| 678 | ASV913  | 1.97906712430238e-05 | 3W_8  | Firmicutes       | Veillonellaceae            | Veillonella               | NA             |
| 679 | ASV100  | 1.92939197141413e-05 | 3B_8  | Proteobacteria   | Gallionellaceae            | Candidatus Nitrotoga      | NA             |
| 680 | ASV86   | 1.92939197141413e-05 | 3B_8  | Myxococcota      | Myxococcaceae              | P3OB-42                   | NA             |
| 681 | ASV889  | 1.69634324940204e-05 | 3W_8  | Proteobacteria   | Beijerinckiaceae           | Methylobacterium-Methylor | NA             |
| 682 | ASV157  | 1.6632708220716e-05  | 3B_11 | Actinobacteriota | Pseudonocardiaceae         | Pseudonocardia            | NA             |
| 683 | ASV1600 | 1.6632708220716e-05  | 3B_11 | Proteobacteria   | Pasteurellaceae            | Haemophilus               | NA             |
| 684 | ASV275  | 1.6632708220716e-05  | 3B_11 | Proteobacteria   | Moraxellaceae              | Psychrobacter             | NA             |

|     |         |                      |         |                   |                              |                        |              |
|-----|---------|----------------------|---------|-------------------|------------------------------|------------------------|--------------|
| 685 | ASV41   | 1.6632708220716e-05  | 3B_11   | Proteobacteria    | Acidiferrobacteraceae        | Sulfurifustis          | NA           |
| 686 | ASV1600 | 1.64982742805103e-05 | 3W_11   | Proteobacteria    | Pasteurellaceae              | Haemophilus            | NA           |
| 687 | ASV1963 | 1.64982742805103e-05 | 3W_11   | Chloroflexi       | Herpetosiphonaceae           | Herpetosiphon          | NA           |
| 688 | ASV1967 | 1.64982742805103e-05 | 3W_11   | Actinobacteriota  | Nocardiodaceae               | Kribbella              | NA           |
| 689 | ASV109  | 1.5435135771313e-05  | 3B_8    | Verrucomicrobiota | Omnitrophaceae               | Candidatus Omnitrophus | NA           |
| 690 | ASV144  | 1.5435135771313e-05  | 3B_8    | Nitrospirota      | Nitrospiraceae               | Nitrospira             | NA           |
| 691 | ASV1990 | 1.5435135771313e-05  | 3B_8    | Bacteroidota      | Porphyromonadaceae           | Porphyromonas          | NA           |
| 692 | ASV341  | 1.5435135771313e-05  | 3B_8    | Bdellovibrionota  | Bdellovibrionaceae           | Bdellovibrio           | NA           |
| 693 | ASV62   | 1.5435135771313e-05  | 3B_8    | Firmicutes        | Staphylococcaceae            | Staphylococcus         | NA           |
| 694 | ASV865  | 1.5435135771313e-05  | 3B_8    | Actinobacteriota  | Micrococcaceae               | Micrococcus            | NA           |
| 695 | ASV11   | 1.4136193745017e-05  | 3W_8    | Proteobacteria    | Cellvibrionaceae             | Cellvibrio             | NA           |
| 696 | ASV150  | 1.4136193745017e-05  | 3W_8    | Bacteroidota      | Sphingobacteriaceae          | Pedobacter             | NA           |
| 697 | ASV1980 | 1.4136193745017e-05  | 3W_8    | Firmicutes        | Sedimentibacteraceae         | Sedimentibacter        | NA           |
| 698 | ASV993  | 1.4136193745017e-05  | 3W_8    | Bacteroidota      | Dysgonomonadaceae            | Proteiniphilum         | acetatigenes |
| 699 | ASV2001 | 1.31986194244082e-05 | 3W_11   | Verrucomicrobiota | Pedosphaeraceae              | Oikopleura             | NA           |
| 700 | ASV2012 | 1.31986194244082e-05 | 3W_11   | Proteobacteria    | Diplorickettsiaceae          | Rickettsiella          | NA           |
| 701 | ASV936  | 1.31986194244082e-05 | 3W_11   | Verrucomicrobiota | Parachlamydiaceae            | Neochlamydia           | NA           |
| 702 | ASV1425 | 1.2474531165537e-05  | 3B_11   | Proteobacteria    | Rhizobiaceae                 | Neorhizobium           | NA           |
| 703 | ASV2018 | 1.2474531165537e-05  | 3B_11   | Firmicutes        | Streptococcaceae             | Lactococcus            | NA           |
| 704 | ASV2019 | 1.2474531165537e-05  | 3B_11   | Firmicutes        | Carnobacteriaceae            | Alloiococcus           | otitis       |
| 705 | ASV2021 | 1.2474531165537e-05  | 3B_11   | Spirochaetota     | Spirochaetaceae              | Treponema              | NA           |
| 706 | ASV28   | 1.2474531165537e-05  | 3B_11   | Bacteroidota      | Weeksellaceae                | Chryseobacterium       | NA           |
| 707 | ASV181  | 1.15763518284848e-05 | 3B_8    | Firmicutes        | Caldalkalibacillaceae        | Caldalkalibacillus     | NA           |
| 708 | ASV2026 | 1.15763518284848e-05 | 3B_8    | Proteobacteria    | Acetobacteraceae             | Rhodopila              | NA           |
| 709 | ASV211  | 1.15763518284848e-05 | 3B_8    | Proteobacteria    | Rhodobacteraceae             | Paracoccus             | NA           |
| 710 | ASV125  | 9.89896456830616e-06 | 3W_11   | Proteobacteria    | Nitrosomonadaceae            | MND1                   | NA           |
| 711 | ASV1423 | 9.89896456830616e-06 | 3W_11   | Actinobacteriota  | Brevibacteriaceae            | Brevibacterium         | NA           |
| 712 | ASV2034 | 9.89896456830616e-06 | 3W_11   | Acidobacteriota   | Acidobacteriaceae (Subgroup) | Granulicella           | NA           |
| 713 | ASV2041 | 9.89896456830616e-06 | 3W_11   | Bacteroidota      | Spirosomaceae                | Runella                | palustris    |
| 714 | ASV2042 | 9.89896456830616e-06 | 3W_11   | Cyanobacteria     | Microcystaceae               | Cyanothece PCC-7424    | NA           |
| 715 | ASV2061 | 8.4817162470102e-06  | 3W_8    | Firmicutes        | Staphylococcaceae            | Alicoccus              | NA           |
| 716 | ASV9    | 8.4817162470102e-06  | 3W_8    | Proteobacteria    | Moraxellaceae                | Perluclidibaca         | NA           |
| 717 | ASV2065 | 8.31635411035802e-06 | 3B_11   | Cyanobacteria     | Nostocaceae                  | Nostoc PCC-73102       | calcicola    |
| 718 | ASV2066 | 8.31635411035802e-06 | 3B_11   | Proteobacteria    | Enterobacteriaceae           | Klebsiella             | NA           |
| 719 | ASV2067 | 8.31635411035802e-06 | 3B_11   | Bacteroidota      | Prevotellaceae               | Alloprevotella         | NA           |
| 720 | ASV155  | 7.71756788565651e-06 | 3B_8    | Bdellovibrionota  | Bacteriovoracaceae           | Bacteriovorax          | NA           |
| 721 | ASV2073 | 7.71756788565651e-06 | 3B_8    | Campylobacterota  | Campylobacteraceae           | Campylobacter          | ureolyticus  |
| 722 | ASV41   | 7.71756788565651e-06 | 3B_8    | Proteobacteria    | Acidiferrobacteraceae        | Sulfurifustis          | NA           |
| 723 | ASV2087 | 6.5993097122041e-06  | 3W_11   | Firmicutes        | Family XI                    | Anaerococcus           | octavius     |
| 724 | ASV2088 | 6.5993097122041e-06  | 3W_11   | Proteobacteria    | Diplorickettsiaceae          | Aquicella              | NA           |
| 725 | ASV2091 | 6.5993097122041e-06  | 3W_11   | Chloroflexi       | Chloroflexaceae              | Chloronema             | NA           |
| 726 | ASV2095 | 5.6544774980068e-06  | 3W_8    | Firmicutes        | Caldicellulosiraptoraceae    | Caldicellulosiraptor   | NA           |
| 727 | ASV100  |                      | 0 3B_11 | Proteobacteria    | Gallionellaceae              | Candidatus Nitrotoga   | NA           |
| 728 | ASV1004 |                      | 0 3B_11 | Verrucomicrobiota | Pedosphaeraceae              | Ellin517               | NA           |
| 729 | ASV1004 |                      | 0 3W_8  | Verrucomicrobiota | Pedosphaeraceae              | Ellin517               | NA           |
| 730 | ASV1004 |                      | 0 3B_8  | Verrucomicrobiota | Pedosphaeraceae              | Ellin517               | NA           |
| 731 | ASV1005 |                      | 0 3W_8  | Bacteroidota      | Sphingobacteriaceae          | Solitalea              | NA           |
| 732 | ASV1005 |                      | 0 3B_8  | Bacteroidota      | Sphingobacteriaceae          | Solitalea              | NA           |
| 733 | ASV1005 |                      | 0 3B_11 | Bacteroidota      | Sphingobacteriaceae          | Solitalea              | NA           |

|     |         |   |       |                  |                      |                   |             |
|-----|---------|---|-------|------------------|----------------------|-------------------|-------------|
| 734 | ASV101  | 0 | 3W_8  | Myxococcota      | Nannocystaceae       | Nannocystis       | NA          |
| 735 | ASV101  | 0 | 3B_8  | Myxococcota      | Nannocystaceae       | Nannocystis       | NA          |
| 736 | ASV101  | 0 | 3B_11 | Myxococcota      | Nannocystaceae       | Nannocystis       | NA          |
| 737 | ASV1015 | 0 | 3B_11 | Proteobacteria   | Xanthobacteraceae    | Pseudorhodoplanes | NA          |
| 738 | ASV1015 | 0 | 3B_8  | Proteobacteria   | Xanthobacteraceae    | Pseudorhodoplanes | NA          |
| 739 | ASV1015 | 0 | 3W_8  | Proteobacteria   | Xanthobacteraceae    | Pseudorhodoplanes | NA          |
| 740 | ASV1018 | 0 | 3B_8  | Firmicutes       | Carnobacteriaceae    | Desemzia          | incerta     |
| 741 | ASV1018 | 0 | 3B_11 | Firmicutes       | Carnobacteriaceae    | Desemzia          | incerta     |
| 742 | ASV1018 | 0 | 3W_8  | Firmicutes       | Carnobacteriaceae    | Desemzia          | incerta     |
| 743 | ASV1019 | 0 | 3B_11 | Proteobacteria   | Oxalobacteraceae     | Janthinobacterium | NA          |
| 744 | ASV1019 | 0 | 3B_8  | Proteobacteria   | Oxalobacteraceae     | Janthinobacterium | NA          |
| 745 | ASV1019 | 0 | 3W_8  | Proteobacteria   | Oxalobacteraceae     | Janthinobacterium | NA          |
| 746 | ASV102  | 0 | 3W_8  | Proteobacteria   | Pseudohongiellaceae  | Pseudohongiella   | NA          |
| 747 | ASV102  | 0 | 3B_11 | Proteobacteria   | Pseudohongiellaceae  | Pseudohongiella   | NA          |
| 748 | ASV102  | 0 | 3B_8  | Proteobacteria   | Pseudohongiellaceae  | Pseudohongiella   | NA          |
| 749 | ASV1031 | 0 | 3B_8  | Proteobacteria   | Acetobacteraceae     | Rhodovastum       | NA          |
| 750 | ASV1031 | 0 | 3W_8  | Proteobacteria   | Acetobacteraceae     | Rhodovastum       | NA          |
| 751 | ASV1031 | 0 | 3B_11 | Proteobacteria   | Acetobacteraceae     | Rhodovastum       | NA          |
| 752 | ASV1042 | 0 | 3W_8  | Bacteroidota     | Weeksellaceae        | Empedobacter      | NA          |
| 753 | ASV1042 | 0 | 3B_8  | Bacteroidota     | Weeksellaceae        | Empedobacter      | NA          |
| 754 | ASV1042 | 0 | 3B_11 | Bacteroidota     | Weeksellaceae        | Empedobacter      | NA          |
| 755 | ASV1043 | 0 | 3B_11 | Proteobacteria   | Comamonadaceae       | Hylemonella       | NA          |
| 756 | ASV1043 | 0 | 3W_8  | Proteobacteria   | Comamonadaceae       | Hylemonella       | NA          |
| 757 | ASV1043 | 0 | 3B_8  | Proteobacteria   | Comamonadaceae       | Hylemonella       | NA          |
| 758 | ASV1045 | 0 | 3B_8  | Proteobacteria   | Hyphomicrobiaceae    | Pedomicrobium     | NA          |
| 759 | ASV1045 | 0 | 3W_8  | Proteobacteria   | Hyphomicrobiaceae    | Pedomicrobium     | NA          |
| 760 | ASV1045 | 0 | 3B_11 | Proteobacteria   | Hyphomicrobiaceae    | Pedomicrobium     | NA          |
| 761 | ASV106  | 0 | 3B_8  | Actinobacteriota | Microbacteriaceae    | Salinibacterium   | NA          |
| 762 | ASV106  | 0 | 3W_8  | Actinobacteriota | Microbacteriaceae    | Salinibacterium   | NA          |
| 763 | ASV106  | 0 | 3B_11 | Actinobacteriota | Microbacteriaceae    | Salinibacterium   | NA          |
| 764 | ASV1064 | 0 | 3B_8  | Proteobacteria   | Comamonadaceae       | Methylibium       | NA          |
| 765 | ASV1064 | 0 | 3W_8  | Proteobacteria   | Comamonadaceae       | Methylibium       | NA          |
| 766 | ASV1064 | 0 | 3B_11 | Proteobacteria   | Comamonadaceae       | Methylibium       | NA          |
| 767 | ASV1065 | 0 | 3B_8  | Bacteroidota     | Spirosomaceae        | Larkinella        | NA          |
| 768 | ASV1065 | 0 | 3B_11 | Bacteroidota     | Spirosomaceae        | Larkinella        | NA          |
| 769 | ASV1065 | 0 | 3W_8  | Bacteroidota     | Spirosomaceae        | Larkinella        | NA          |
| 770 | ASV1066 | 0 | 3B_8  | Proteobacteria   | Rhizobiaceae         | Shinella          | NA          |
| 771 | ASV1066 | 0 | 3B_11 | Proteobacteria   | Rhizobiaceae         | Shinella          | NA          |
| 772 | ASV1066 | 0 | 3W_8  | Proteobacteria   | Rhizobiaceae         | Shinella          | NA          |
| 773 | ASV1069 | 0 | 3B_8  | Bacteroidota     | Saprospiraceae       | Lewinella         | NA          |
| 774 | ASV1069 | 0 | 3B_11 | Bacteroidota     | Saprospiraceae       | Lewinella         | NA          |
| 775 | ASV1069 | 0 | 3W_8  | Bacteroidota     | Saprospiraceae       | Lewinella         | NA          |
| 776 | ASV107  | 0 | 3B_11 | Bacteroidota     | Chitinophagaceae     | Edaphobaculum     | NA          |
| 777 | ASV107  | 0 | 3B_8  | Bacteroidota     | Chitinophagaceae     | Edaphobaculum     | NA          |
| 778 | ASV107  | 0 | 3W_8  | Bacteroidota     | Chitinophagaceae     | Edaphobaculum     | NA          |
| 779 | ASV1072 | 0 | 3B_11 | Actinobacteriota | Solirubrobacteraceae | Solirubrobacter   | taibaiensis |
| 780 | ASV1072 | 0 | 3B_8  | Actinobacteriota | Solirubrobacteraceae | Solirubrobacter   | taibaiensis |
| 781 | ASV1072 | 0 | 3W_8  | Actinobacteriota | Solirubrobacteraceae | Solirubrobacter   | taibaiensis |
| 782 | ASV108  | 0 | 3B_8  | Actinobacteriota | Nakamurellaceae      | Nakamurella       | NA          |

|     |         |   |       |                   |                    |                        |                |
|-----|---------|---|-------|-------------------|--------------------|------------------------|----------------|
| 783 | ASV108  | 0 | 3W_8  | Actinobacteriota  | Nakamurellaceae    | Nakamurella            | NA             |
| 784 | ASV108  | 0 | 3B_11 | Actinobacteriota  | Nakamurellaceae    | Nakamurella            | NA             |
| 785 | ASV1087 | 0 | 3B_8  | Chloroflexi       | Caldiilineaceae    | Litorilinea            | NA             |
| 786 | ASV1087 | 0 | 3W_8  | Chloroflexi       | Caldiilineaceae    | Litorilinea            | NA             |
| 787 | ASV1087 | 0 | 3B_11 | Chloroflexi       | Caldiilineaceae    | Litorilinea            | NA             |
| 788 | ASV109  | 0 | 3B_11 | Verrucomicrobiota | Omnitrophaceae     | Candidatus Omnitrophus | NA             |
| 789 | ASV1092 | 0 | 3B_8  | Myxococcota       | Polyangiaceae      | Pajaroellobacter       | NA             |
| 790 | ASV1092 | 0 | 3W_8  | Myxococcota       | Polyangiaceae      | Pajaroellobacter       | NA             |
| 791 | ASV1092 | 0 | 3B_11 | Myxococcota       | Polyangiaceae      | Pajaroellobacter       | NA             |
| 792 | ASV1094 | 0 | 3B_8  | Actinobacteriota  | Dermabacteraceae   | Brachybacterium        | NA             |
| 793 | ASV1094 | 0 | 3B_11 | Actinobacteriota  | Dermabacteraceae   | Brachybacterium        | NA             |
| 794 | ASV1095 | 0 | 3W_11 | Chloroflexi       | Anaerolineaceae    | Levilina               | saccharolytica |
| 795 | ASV1095 | 0 | 3B_8  | Chloroflexi       | Anaerolineaceae    | Levilina               | saccharolytica |
| 796 | ASV1095 | 0 | 3B_11 | Chloroflexi       | Anaerolineaceae    | Levilina               | saccharolytica |
| 797 | ASV1096 | 0 | 3B_8  | Verrucomicrobiota | Pedosphaeraceae    | SH3-11                 | NA             |
| 798 | ASV1096 | 0 | 3W_8  | Verrucomicrobiota | Pedosphaeraceae    | SH3-11                 | NA             |
| 799 | ASV1096 | 0 | 3B_11 | Verrucomicrobiota | Pedosphaeraceae    | SH3-11                 | NA             |
| 800 | ASV11   | 0 | 3B_8  | Proteobacteria    | Cellvibrionaceae   | Cellvibrio             | NA             |
| 801 | ASV11   | 0 | 3B_11 | Proteobacteria    | Cellvibrionaceae   | Cellvibrio             | NA             |
| 802 | ASV1105 | 0 | 3W_8  | Actinobacteriota  | Microtrichaceae    | IMCC26207              | NA             |
| 803 | ASV1105 | 0 | 3B_11 | Actinobacteriota  | Microtrichaceae    | IMCC26207              | NA             |
| 804 | ASV1105 | 0 | 3B_8  | Actinobacteriota  | Microtrichaceae    | IMCC26207              | NA             |
| 805 | ASV1106 | 0 | 3W_8  | Proteobacteria    | Comamonadaceae     | Comamonas              | jiangduensis   |
| 806 | ASV1106 | 0 | 3B_11 | Proteobacteria    | Comamonadaceae     | Comamonas              | jiangduensis   |
| 807 | ASV1106 | 0 | 3B_8  | Proteobacteria    | Comamonadaceae     | Comamonas              | jiangduensis   |
| 808 | ASV1115 | 0 | 3W_8  | Gemmatimonadota   | Longimicrobiaceae  | Longimicrobium         | NA             |
| 809 | ASV1115 | 0 | 3B_8  | Gemmatimonadota   | Longimicrobiaceae  | Longimicrobium         | NA             |
| 810 | ASV1115 | 0 | 3B_11 | Gemmatimonadota   | Longimicrobiaceae  | Longimicrobium         | NA             |
| 811 | ASV1116 | 0 | 3B_8  | Actinobacteriota  | Cellulomonadaceae  | Cellulomonas           | NA             |
| 812 | ASV1116 | 0 | 3B_11 | Actinobacteriota  | Cellulomonadaceae  | Cellulomonas           | NA             |
| 813 | ASV1116 | 0 | 3W_8  | Actinobacteriota  | Cellulomonadaceae  | Cellulomonas           | NA             |
| 814 | ASV1119 | 0 | 3B_11 | Proteobacteria    | Enterobacteriaceae | Escherichia-Shigella   | NA             |
| 815 | ASV1119 | 0 | 3W_8  | Proteobacteria    | Enterobacteriaceae | Escherichia-Shigella   | NA             |
| 816 | ASV1119 | 0 | 3B_8  | Proteobacteria    | Enterobacteriaceae | Escherichia-Shigella   | NA             |
| 817 | ASV112  | 0 | 3B_8  | Proteobacteria    | Rhodobacteraceae   | Tabrizicola            | aquatica       |
| 818 | ASV112  | 0 | 3B_11 | Proteobacteria    | Rhodobacteraceae   | Tabrizicola            | aquatica       |
| 819 | ASV112  | 0 | 3W_8  | Proteobacteria    | Rhodobacteraceae   | Tabrizicola            | aquatica       |
| 820 | ASV1128 | 0 | 3B_11 | Proteobacteria    | Alcaligenaceae     | Verticiella            | NA             |
| 821 | ASV1128 | 0 | 3W_8  | Proteobacteria    | Alcaligenaceae     | Verticiella            | NA             |
| 822 | ASV1128 | 0 | 3B_8  | Proteobacteria    | Alcaligenaceae     | Verticiella            | NA             |
| 823 | ASV1132 | 0 | 3B_11 | Actinobacteriota  | Nocardiodaceae     | Aeromicrobium          | choanae        |
| 824 | ASV1132 | 0 | 3B_8  | Actinobacteriota  | Nocardiodaceae     | Aeromicrobium          | choanae        |
| 825 | ASV1132 | 0 | 3W_8  | Actinobacteriota  | Nocardiodaceae     | Aeromicrobium          | choanae        |
| 826 | ASV1135 | 0 | 3B_8  | Verrucomicrobiota | Terrimicrobiaceae  | Terrimicrobium         | NA             |
| 827 | ASV1135 | 0 | 3W_8  | Verrucomicrobiota | Terrimicrobiaceae  | Terrimicrobium         | NA             |
| 828 | ASV1135 | 0 | 3B_11 | Verrucomicrobiota | Terrimicrobiaceae  | Terrimicrobium         | NA             |
| 829 | ASV114  | 0 | 3B_8  | Firmicutes        | Bacillaceae        | Falsibacillus          | NA             |
| 830 | ASV114  | 0 | 3B_11 | Firmicutes        | Bacillaceae        | Falsibacillus          | NA             |
| 831 | ASV1142 | 0 | 3B_8  | Proteobacteria    | Rhizobiaceae       | Pseudorhizobium        | NA             |

|     |         |   |       |                   |                      |                           |            |
|-----|---------|---|-------|-------------------|----------------------|---------------------------|------------|
| 832 | ASV1142 | 0 | 3W_8  | Proteobacteria    | Rhizobiaceae         | Pseudorhizobium           | NA         |
| 833 | ASV1142 | 0 | 3B_11 | Proteobacteria    | Rhizobiaceae         | Pseudorhizobium           | NA         |
| 834 | ASV115  | 0 | 3B_8  | Bacteroidota      | Spirosomaceae        | Dyadobacter               | NA         |
| 835 | ASV115  | 0 | 3W_8  | Bacteroidota      | Spirosomaceae        | Dyadobacter               | NA         |
| 836 | ASV115  | 0 | 3B_11 | Bacteroidota      | Spirosomaceae        | Dyadobacter               | NA         |
| 837 | ASV1154 | 0 | 3W_8  | Proteobacteria    | Cellvibrionaceae     | Cellvibrio                | fulvus     |
| 838 | ASV1154 | 0 | 3B_8  | Proteobacteria    | Cellvibrionaceae     | Cellvibrio                | fulvus     |
| 839 | ASV1154 | 0 | 3B_11 | Proteobacteria    | Cellvibrionaceae     | Cellvibrio                | fulvus     |
| 840 | ASV116  | 0 | 3W_8  | Actinobacteriota  | Microbacteriaceae    | Lysinimonas               | NA         |
| 841 | ASV116  | 0 | 3B_8  | Actinobacteriota  | Microbacteriaceae    | Lysinimonas               | NA         |
| 842 | ASV116  | 0 | 3B_11 | Actinobacteriota  | Microbacteriaceae    | Lysinimonas               | NA         |
| 843 | ASV1161 | 0 | 3W_8  | Verrucomicrobiota | Parachlamydiaceae    | Candidatus Protochlamydia | NA         |
| 844 | ASV1161 | 0 | 3B_8  | Verrucomicrobiota | Parachlamydiaceae    | Candidatus Protochlamydia | NA         |
| 845 | ASV1165 | 0 | 3B_8  | Proteobacteria    | Rhodobacteraceae     | Tabrizicola               | NA         |
| 846 | ASV1165 | 0 | 3B_11 | Proteobacteria    | Rhodobacteraceae     | Tabrizicola               | NA         |
| 847 | ASV1165 | 0 | 3W_8  | Proteobacteria    | Rhodobacteraceae     | Tabrizicola               | NA         |
| 848 | ASV117  | 0 | 3W_8  | Bacteroidota      | Flavobacteriaceae    | Flavobacterium            | NA         |
| 849 | ASV117  | 0 | 3B_8  | Bacteroidota      | Flavobacteriaceae    | Flavobacterium            | NA         |
| 850 | ASV117  | 0 | 3B_11 | Bacteroidota      | Flavobacteriaceae    | Flavobacterium            | NA         |
| 851 | ASV1170 | 0 | 3B_8  | Firmicutes        | Lachnospiraceae      | Lachnoanaerobaculum       | NA         |
| 852 | ASV1170 | 0 | 3W_11 | Firmicutes        | Lachnospiraceae      | Lachnoanaerobaculum       | NA         |
| 853 | ASV1170 | 0 | 3B_11 | Firmicutes        | Lachnospiraceae      | Lachnoanaerobaculum       | NA         |
| 854 | ASV1171 | 0 | 3W_8  | Actinobacteriota  | Micrococcaceae       | Citricoccus               | NA         |
| 855 | ASV1171 | 0 | 3W_11 | Actinobacteriota  | Micrococcaceae       | Citricoccus               | NA         |
| 856 | ASV1171 | 0 | 3B_8  | Actinobacteriota  | Micrococcaceae       | Citricoccus               | NA         |
| 857 | ASV1174 | 0 | 3B_8  | Bacteroidota      | Saprosiraceae        | OLB8                      | NA         |
| 858 | ASV1174 | 0 | 3W_8  | Bacteroidota      | Saprosiraceae        | OLB8                      | NA         |
| 859 | ASV1174 | 0 | 3B_11 | Bacteroidota      | Saprosiraceae        | OLB8                      | NA         |
| 860 | ASV1178 | 0 | 3W_8  | Proteobacteria    | Pseudomonadaceae     | Pseudomonas               | oleovorans |
| 861 | ASV1178 | 0 | 3B_11 | Proteobacteria    | Pseudomonadaceae     | Pseudomonas               | oleovorans |
| 862 | ASV1178 | 0 | 3B_8  | Proteobacteria    | Pseudomonadaceae     | Pseudomonas               | oleovorans |
| 863 | ASV1179 | 0 | 3W_8  | Actinobacteriota  | Solirubrobacteraceae | Conexibacter              | NA         |
| 864 | ASV1179 | 0 | 3B_11 | Actinobacteriota  | Solirubrobacteraceae | Conexibacter              | NA         |
| 865 | ASV1179 | 0 | 3B_8  | Actinobacteriota  | Solirubrobacteraceae | Conexibacter              | NA         |
| 866 | ASV118  | 0 | 3W_8  | Proteobacteria    | Hyphomonadaceae      | Hirschia                  | NA         |
| 867 | ASV118  | 0 | 3B_8  | Proteobacteria    | Hyphomonadaceae      | Hirschia                  | NA         |
| 868 | ASV118  | 0 | 3B_11 | Proteobacteria    | Hyphomonadaceae      | Hirschia                  | NA         |
| 869 | ASV1183 | 0 | 3B_11 | Fibrobacterota    | Fibrobacteraceae     | possible genus 04         | NA         |
| 870 | ASV1183 | 0 | 3B_8  | Fibrobacterota    | Fibrobacteraceae     | possible genus 04         | NA         |
| 871 | ASV1183 | 0 | 3W_8  | Fibrobacterota    | Fibrobacteraceae     | possible genus 04         | NA         |
| 872 | ASV1187 | 0 | 3W_8  | Proteobacteria    | Burkholderiaceae     | Limnobacter               | NA         |
| 873 | ASV1187 | 0 | 3B_8  | Proteobacteria    | Burkholderiaceae     | Limnobacter               | NA         |
| 874 | ASV1187 | 0 | 3B_11 | Proteobacteria    | Burkholderiaceae     | Limnobacter               | NA         |
| 875 | ASV119  | 0 | 3W_8  | Proteobacteria    | Alcaligenaceae       | Candidimonas              | NA         |
| 876 | ASV119  | 0 | 3B_8  | Proteobacteria    | Alcaligenaceae       | Candidimonas              | NA         |
| 877 | ASV119  | 0 | 3B_11 | Proteobacteria    | Alcaligenaceae       | Candidimonas              | NA         |
| 878 | ASV1190 | 0 | 3B_8  | Proteobacteria    | Labraceae            | Labrys                    | NA         |
| 879 | ASV1190 | 0 | 3B_11 | Proteobacteria    | Labraceae            | Labrys                    | NA         |
| 880 | ASV1190 | 0 | 3W_8  | Proteobacteria    | Labraceae            | Labrys                    | NA         |

|     |         |   |       |                  |                    |                         |                |
|-----|---------|---|-------|------------------|--------------------|-------------------------|----------------|
| 881 | ASV1195 | 0 | 3W_8  | Proteobacteria   | Sphingomonadaceae  | Sphingomonas            | kaistensis     |
| 882 | ASV1195 | 0 | 3B_11 | Proteobacteria   | Sphingomonadaceae  | Sphingomonas            | kaistensis     |
| 883 | ASV1195 | 0 | 3B_8  | Proteobacteria   | Sphingomonadaceae  | Sphingomonas            | kaistensis     |
| 884 | ASV12   | 0 | 3B_8  | Bacteroidota     | Chitinophagaceae   | Terrimonas              | NA             |
| 885 | ASV12   | 0 | 3B_11 | Bacteroidota     | Chitinophagaceae   | Terrimonas              | NA             |
| 886 | ASV1200 | 0 | 3B_8  | Firmicutes       | Ruminococcaceae    | Paludicola              | NA             |
| 887 | ASV1200 | 0 | 3B_11 | Firmicutes       | Ruminococcaceae    | Paludicola              | NA             |
| 888 | ASV1208 | 0 | 3W_8  | Proteobacteria   | Acetobacteraceae   | Craurococcus-Caldovatus | NA             |
| 889 | ASV1208 | 0 | 3B_11 | Proteobacteria   | Acetobacteraceae   | Craurococcus-Caldovatus | NA             |
| 890 | ASV1208 | 0 | 3B_8  | Proteobacteria   | Acetobacteraceae   | Craurococcus-Caldovatus | NA             |
| 891 | ASV121  | 0 | 3B_8  | Actinobacteriota | Corynebacteriaceae | Lawsonella              | clevelandensis |
| 892 | ASV1212 | 0 | 3W_8  | Proteobacteria   | Beijerinckiaceae   | Methylocella            | NA             |
| 893 | ASV1212 | 0 | 3B_8  | Proteobacteria   | Beijerinckiaceae   | Methylocella            | NA             |
| 894 | ASV1214 | 0 | 3W_8  | Proteobacteria   | Alcaligenaceae     | Eoetvoesia              | caeni          |
| 895 | ASV1214 | 0 | 3B_8  | Proteobacteria   | Alcaligenaceae     | Eoetvoesia              | caeni          |
| 896 | ASV1214 | 0 | 3B_11 | Proteobacteria   | Alcaligenaceae     | Eoetvoesia              | caeni          |
| 897 | ASV1221 | 0 | 3W_8  | Abditibacteriota | Abditibacteriaceae | Abditibacterium         | NA             |
| 898 | ASV1221 | 0 | 3B_8  | Abditibacteriota | Abditibacteriaceae | Abditibacterium         | NA             |
| 899 | ASV1221 | 0 | 3B_11 | Abditibacteriota | Abditibacteriaceae | Abditibacterium         | NA             |
| 900 | ASV1230 | 0 | 3B_11 | Proteobacteria   | Rhodocyclaceae     | Sulfuritalea            | NA             |
| 901 | ASV1230 | 0 | 3W_8  | Proteobacteria   | Rhodocyclaceae     | Sulfuritalea            | NA             |
| 902 | ASV1230 | 0 | 3B_8  | Proteobacteria   | Rhodocyclaceae     | Sulfuritalea            | NA             |
| 903 | ASV1247 | 0 | 3B_8  | Cyanobacteria    | Coleofasciculaceae | Wilmottia Ant-Ph58      | NA             |
| 904 | ASV1247 | 0 | 3W_8  | Cyanobacteria    | Coleofasciculaceae | Wilmottia Ant-Ph58      | NA             |
| 905 | ASV1247 | 0 | 3B_11 | Cyanobacteria    | Coleofasciculaceae | Wilmottia Ant-Ph58      | NA             |
| 906 | ASV125  | 0 | 3B_11 | Proteobacteria   | Nitrosomonadaceae  | MND1                    | NA             |
| 907 | ASV1251 | 0 | 3B_8  | Armatimonadota   | Fimbriimonadaceae  | Fimbriimonas            | NA             |
| 908 | ASV1251 | 0 | 3B_11 | Armatimonadota   | Fimbriimonadaceae  | Fimbriimonas            | NA             |
| 909 | ASV1251 | 0 | 3W_8  | Armatimonadota   | Fimbriimonadaceae  | Fimbriimonas            | NA             |
| 910 | ASV1257 | 0 | 3B_8  | Actinobacteriota | Kineosporiaceae    | Kineosporia             | NA             |
| 911 | ASV1257 | 0 | 3W_8  | Actinobacteriota | Kineosporiaceae    | Kineosporia             | NA             |
| 912 | ASV1257 | 0 | 3B_11 | Actinobacteriota | Kineosporiaceae    | Kineosporia             | NA             |
| 913 | ASV1260 | 0 | 3W_8  | Firmicutes       | Lactobacillaceae   | Lactobacillus           | NA             |
| 914 | ASV1260 | 0 | 3B_11 | Firmicutes       | Lactobacillaceae   | Lactobacillus           | NA             |
| 915 | ASV1260 | 0 | 3B_8  | Firmicutes       | Lactobacillaceae   | Lactobacillus           | NA             |
| 916 | ASV1268 | 0 | 3B_11 | Proteobacteria   | Sphingomonadaceae  | Parablastomonas         | NA             |
| 917 | ASV1268 | 0 | 3W_8  | Proteobacteria   | Sphingomonadaceae  | Parablastomonas         | NA             |
| 918 | ASV1268 | 0 | 3B_8  | Proteobacteria   | Sphingomonadaceae  | Parablastomonas         | NA             |
| 919 | ASV1277 | 0 | 3B_11 | Bacteroidota     | Hymenobacteraceae  | Hymenobacter            | psychrophilus  |
| 920 | ASV1277 | 0 | 3W_8  | Bacteroidota     | Hymenobacteraceae  | Hymenobacter            | psychrophilus  |
| 921 | ASV1277 | 0 | 3B_8  | Bacteroidota     | Hymenobacteraceae  | Hymenobacter            | psychrophilus  |
| 922 | ASV128  | 0 | 3W_8  | Bacteroidota     | Chitinophagaceae   | Rurimicrobium           | NA             |
| 923 | ASV128  | 0 | 3B_8  | Bacteroidota     | Chitinophagaceae   | Rurimicrobium           | NA             |
| 924 | ASV128  | 0 | 3B_11 | Bacteroidota     | Chitinophagaceae   | Rurimicrobium           | NA             |
| 925 | ASV1286 | 0 | 3W_8  | Proteobacteria   | Rhizobiaceae       | Pseudaminobacter        | NA             |
| 926 | ASV1286 | 0 | 3B_8  | Proteobacteria   | Rhizobiaceae       | Pseudaminobacter        | NA             |
| 927 | ASV1286 | 0 | 3B_11 | Proteobacteria   | Rhizobiaceae       | Pseudaminobacter        | NA             |
| 928 | ASV1291 | 0 | 3B_11 | Firmicutes       | Lachnospiraceae    | Oribacterium            | sinus          |
| 929 | ASV1291 | 0 | 3B_8  | Firmicutes       | Lachnospiraceae    | Oribacterium            | sinus          |

|     |         |   |       |                   |                    |                            |                |
|-----|---------|---|-------|-------------------|--------------------|----------------------------|----------------|
| 930 | ASV1291 | 0 | 3W_8  | Firmicutes        | Lachnospiraceae    | Oribacterium               | sinus          |
| 931 | ASV1296 | 0 | 3B_11 | Bacteroidota      | Cytophagaceae      | Rhodocytophaga             | NA             |
| 932 | ASV1296 | 0 | 3W_8  | Bacteroidota      | Cytophagaceae      | Rhodocytophaga             | NA             |
| 933 | ASV1296 | 0 | 3B_8  | Bacteroidota      | Cytophagaceae      | Rhodocytophaga             | NA             |
| 934 | ASV1299 | 0 | 3B_8  | Actinobacteriota  | Actinomycetaceae   | Actinomyces                | NA             |
| 935 | ASV1299 | 0 | 3B_11 | Actinobacteriota  | Actinomycetaceae   | Actinomyces                | NA             |
| 936 | ASV1299 | 0 | 3W_8  | Actinobacteriota  | Actinomycetaceae   | Actinomyces                | NA             |
| 937 | ASV13   | 0 | 3B_8  | Actinobacteriota  | Nocardoidaceae     | Aeromicrobium              | alkaliterrae   |
| 938 | ASV13   | 0 | 3W_8  | Actinobacteriota  | Nocardoidaceae     | Aeromicrobium              | alkaliterrae   |
| 939 | ASV1301 | 0 | 3B_8  | Actinobacteriota  | Micromonosporaceae | Catenuloplanes             | NA             |
| 940 | ASV1301 | 0 | 3W_8  | Actinobacteriota  | Micromonosporaceae | Catenuloplanes             | NA             |
| 941 | ASV1301 | 0 | 3B_11 | Actinobacteriota  | Micromonosporaceae | Catenuloplanes             | NA             |
| 942 | ASV1304 | 0 | 3B_8  | Proteobacteria    | Sphingomonadaceae  | Sandaracinobacter          | NA             |
| 943 | ASV1304 | 0 | 3W_8  | Proteobacteria    | Sphingomonadaceae  | Sandaracinobacter          | NA             |
| 944 | ASV1304 | 0 | 3B_11 | Proteobacteria    | Sphingomonadaceae  | Sandaracinobacter          | NA             |
| 945 | ASV1306 | 0 | 3B_8  | Verrucomicrobiota | Parachlamydiaceae  | Candidatus Metachlamydia   | NA             |
| 946 | ASV1306 | 0 | 3W_8  | Verrucomicrobiota | Parachlamydiaceae  | Candidatus Metachlamydia   | NA             |
| 947 | ASV1306 | 0 | 3B_11 | Verrucomicrobiota | Parachlamydiaceae  | Candidatus Metachlamydia   | NA             |
| 948 | ASV1308 | 0 | 3B_8  | Bacteroidota      | Microscillaceae    | OLB12                      | NA             |
| 949 | ASV1308 | 0 | 3B_11 | Bacteroidota      | Microscillaceae    | OLB12                      | NA             |
| 950 | ASV1308 | 0 | 3W_8  | Bacteroidota      | Microscillaceae    | OLB12                      | NA             |
| 951 | ASV1310 | 0 | 3W_8  | Cyanobacteria     | Chroococciopsaceae | Aliterella                 | NA             |
| 952 | ASV1310 | 0 | 3B_11 | Cyanobacteria     | Chroococciopsaceae | Aliterella                 | NA             |
| 953 | ASV1310 | 0 | 3B_8  | Cyanobacteria     | Chroococciopsaceae | Aliterella                 | NA             |
| 954 | ASV1315 | 0 | 3B_11 | Firmicutes        | Paenibacillaceae   | Ammonibacillus             | agariperforans |
| 955 | ASV1315 | 0 | 3B_8  | Firmicutes        | Paenibacillaceae   | Ammonibacillus             | agariperforans |
| 956 | ASV1315 | 0 | 3W_11 | Firmicutes        | Paenibacillaceae   | Ammonibacillus             | agariperforans |
| 957 | ASV132  | 0 | 3W_11 | Proteobacteria    | Rhizobiaceae       | Phyllobacterium            | NA             |
| 958 | ASV132  | 0 | 3B_8  | Proteobacteria    | Rhizobiaceae       | Phyllobacterium            | NA             |
| 959 | ASV132  | 0 | 3B_11 | Proteobacteria    | Rhizobiaceae       | Phyllobacterium            | NA             |
| 960 | ASV133  | 0 | 3B_11 | Bacteroidota      | Flavobacteriaceae  | Aequorivita                | nionensis      |
| 961 | ASV133  | 0 | 3W_8  | Bacteroidota      | Flavobacteriaceae  | Aequorivita                | nionensis      |
| 962 | ASV133  | 0 | 3B_8  | Bacteroidota      | Flavobacteriaceae  | Aequorivita                | nionensis      |
| 963 | ASV1335 | 0 | 3B_8  | Firmicutes        | Bacillaceae        | Anaerobacillus             | NA             |
| 964 | ASV1335 | 0 | 3W_8  | Firmicutes        | Bacillaceae        | Anaerobacillus             | NA             |
| 965 | ASV1335 | 0 | 3W_11 | Firmicutes        | Bacillaceae        | Anaerobacillus             | NA             |
| 966 | ASV1337 | 0 | 3B_11 | Firmicutes        | Thermicanaceae     | Thermicanus                | NA             |
| 967 | ASV1337 | 0 | 3W_8  | Firmicutes        | Thermicanaceae     | Thermicanus                | NA             |
| 968 | ASV1337 | 0 | 3B_8  | Firmicutes        | Thermicanaceae     | Thermicanus                | NA             |
| 969 | ASV134  | 0 | 3B_11 | Proteobacteria    | Rhizobiaceae       | Allorhizobium-Neorhizobium | NA             |
| 970 | ASV134  | 0 | 3W_8  | Proteobacteria    | Rhizobiaceae       | Allorhizobium-Neorhizobium | NA             |
| 971 | ASV134  | 0 | 3B_8  | Proteobacteria    | Rhizobiaceae       | Allorhizobium-Neorhizobium | NA             |
| 972 | ASV1346 | 0 | 3B_11 | Proteobacteria    | Nitrosomonadaceae  | Nitrosomonas               | NA             |
| 973 | ASV1346 | 0 | 3W_8  | Proteobacteria    | Nitrosomonadaceae  | Nitrosomonas               | NA             |
| 974 | ASV1346 | 0 | 3B_8  | Proteobacteria    | Nitrosomonadaceae  | Nitrosomonas               | NA             |
| 975 | ASV135  | 0 | 3W_8  | Proteobacteria    | Rhodobacteraceae   | Rhodobacter                | NA             |
| 976 | ASV135  | 0 | 3B_11 | Proteobacteria    | Rhodobacteraceae   | Rhodobacter                | NA             |
| 977 | ASV135  | 0 | 3B_8  | Proteobacteria    | Rhodobacteraceae   | Rhodobacter                | NA             |
| 978 | ASV136  | 0 | 3W_8  | Proteobacteria    | Rhizobiaceae       | Pseudorhizobium            | pelagicum      |

|      |         |   |       |                  |                        |                             |              |
|------|---------|---|-------|------------------|------------------------|-----------------------------|--------------|
| 979  | ASV136  | 0 | 3B_11 | Proteobacteria   | Rhizobiaceae           | Pseudorhizobium             | pelagicum    |
| 980  | ASV136  | 0 | 3B_8  | Proteobacteria   | Rhizobiaceae           | Pseudorhizobium             | pelagicum    |
| 981  | ASV1363 | 0 | 3B_8  | Proteobacteria   | Defluviococcaceae      | Defluviococcus              | NA           |
| 982  | ASV1363 | 0 | 3B_11 | Proteobacteria   | Defluviococcaceae      | Defluviococcus              | NA           |
| 983  | ASV1363 | 0 | 3W_8  | Proteobacteria   | Defluviococcaceae      | Defluviococcus              | NA           |
| 984  | ASV1366 | 0 | 3W_8  | Proteobacteria   | Sphingomonadaceae      | Sphingobium                 | sufflavum    |
| 985  | ASV1366 | 0 | 3B_8  | Proteobacteria   | Sphingomonadaceae      | Sphingobium                 | sufflavum    |
| 986  | ASV1366 | 0 | 3B_11 | Proteobacteria   | Sphingomonadaceae      | Sphingobium                 | sufflavum    |
| 987  | ASV1369 | 0 | 3W_8  | Proteobacteria   | Nitrosomonadaceae      | oc32                        | NA           |
| 988  | ASV1369 | 0 | 3B_8  | Proteobacteria   | Nitrosomonadaceae      | oc32                        | NA           |
| 989  | ASV1369 | 0 | 3B_11 | Proteobacteria   | Nitrosomonadaceae      | oc32                        | NA           |
| 990  | ASV1371 | 0 | 3B_8  | Proteobacteria   | Caedibacteraceae       | Caedibacter                 | NA           |
| 991  | ASV1371 | 0 | 3B_11 | Proteobacteria   | Caedibacteraceae       | Caedibacter                 | NA           |
| 992  | ASV1379 | 0 | 3B_8  | Patescibacteria  | Saccharimonadaceae     | TM7a                        | NA           |
| 993  | ASV1379 | 0 | 3B_11 | Patescibacteria  | Saccharimonadaceae     | TM7a                        | NA           |
| 994  | ASV1379 | 0 | 3W_8  | Patescibacteria  | Saccharimonadaceae     | TM7a                        | NA           |
| 995  | ASV138  | 0 | 3W_8  | Firmicutes       | Planococcaceae         | Planomicrobium              | NA           |
| 996  | ASV138  | 0 | 3B_11 | Firmicutes       | Planococcaceae         | Planomicrobium              | NA           |
| 997  | ASV1385 | 0 | 3B_8  | Proteobacteria   | Rhodobacteraceae       | Cereibacter                 | NA           |
| 998  | ASV1385 | 0 | 3W_8  | Proteobacteria   | Rhodobacteraceae       | Cereibacter                 | NA           |
| 999  | ASV1385 | 0 | 3B_11 | Proteobacteria   | Rhodobacteraceae       | Cereibacter                 | NA           |
| 1000 | ASV139  | 0 | 3W_8  | Bacteroidota     | Sphingobacteriaceae    | Pedobacter                  | boryungensis |
| 1001 | ASV139  | 0 | 3B_11 | Bacteroidota     | Sphingobacteriaceae    | Pedobacter                  | boryungensis |
| 1002 | ASV139  | 0 | 3B_8  | Bacteroidota     | Sphingobacteriaceae    | Pedobacter                  | boryungensis |
| 1003 | ASV1391 | 0 | 3B_8  | Myxococcota      | Phaselicytidaceae      | Phaselicystis               | NA           |
| 1004 | ASV1391 | 0 | 3W_8  | Myxococcota      | Phaselicytidaceae      | Phaselicystis               | NA           |
| 1005 | ASV1391 | 0 | 3B_11 | Myxococcota      | Phaselicytidaceae      | Phaselicystis               | NA           |
| 1006 | ASV1393 | 0 | 3B_8  | Proteobacteria   | Beijerinckiaceae       | Psychroglaciecola           | NA           |
| 1007 | ASV1393 | 0 | 3B_11 | Proteobacteria   | Beijerinckiaceae       | Psychroglaciecola           | NA           |
| 1008 | ASV1393 | 0 | 3W_8  | Proteobacteria   | Beijerinckiaceae       | Psychroglaciecola           | NA           |
| 1009 | ASV1401 | 0 | 3B_8  | Firmicutes       | Christensenellaceae    | Christensenellaceae R-7 grc | NA           |
| 1010 | ASV1401 | 0 | 3B_11 | Firmicutes       | Christensenellaceae    | Christensenellaceae R-7 grc | NA           |
| 1011 | ASV1403 | 0 | 3W_8  | Planctomycetota  | Gemmataceae            | Telmatocola                 | NA           |
| 1012 | ASV1403 | 0 | 3B_11 | Planctomycetota  | Gemmataceae            | Telmatocola                 | NA           |
| 1013 | ASV1403 | 0 | 3B_8  | Planctomycetota  | Gemmataceae            | Telmatocola                 | NA           |
| 1014 | ASV141  | 0 | 3B_8  | Firmicutes       | Lactobacillaceae       | Fructobacillus              | fructosus    |
| 1015 | ASV141  | 0 | 3W_8  | Firmicutes       | Lactobacillaceae       | Fructobacillus              | fructosus    |
| 1016 | ASV141  | 0 | 3B_11 | Firmicutes       | Lactobacillaceae       | Fructobacillus              | fructosus    |
| 1017 | ASV1410 | 0 | 3B_8  | Proteobacteria   | Moraxellaceae          | Alkanindiges                | NA           |
| 1018 | ASV1410 | 0 | 3W_8  | Proteobacteria   | Moraxellaceae          | Alkanindiges                | NA           |
| 1019 | ASV1410 | 0 | 3B_11 | Proteobacteria   | Moraxellaceae          | Alkanindiges                | NA           |
| 1020 | ASV1417 | 0 | 3B_11 | Actinobacteriota | Micromonosporaceae     | Virgisporangium             | NA           |
| 1021 | ASV1417 | 0 | 3B_8  | Actinobacteriota | Micromonosporaceae     | Virgisporangium             | NA           |
| 1022 | ASV1417 | 0 | 3W_8  | Actinobacteriota | Micromonosporaceae     | Virgisporangium             | NA           |
| 1023 | ASV142  | 0 | 3B_8  | Bacteroidota     | Sphingobacteriaceae    | Sphingobacterium            | NA           |
| 1024 | ASV142  | 0 | 3B_11 | Bacteroidota     | Sphingobacteriaceae    | Sphingobacterium            | NA           |
| 1025 | ASV1421 | 0 | 3B_8  | Proteobacteria   | Pseudoalteromonadaceae | Pseudoalteromonas           | NA           |
| 1026 | ASV1421 | 0 | 3W_11 | Proteobacteria   | Pseudoalteromonadaceae | Pseudoalteromonas           | NA           |
| 1027 | ASV1421 | 0 | 3W_8  | Proteobacteria   | Pseudoalteromonadaceae | Pseudoalteromonas           | NA           |

|      |         |   |       |                   |                      |                            |                |
|------|---------|---|-------|-------------------|----------------------|----------------------------|----------------|
| 1028 | ASV1423 | 0 | 3B_8  | Actinobacteriota  | Brevibacteriaceae    | Brevibacterium             | NA             |
| 1029 | ASV1423 | 0 | 3W_8  | Actinobacteriota  | Brevibacteriaceae    | Brevibacterium             | NA             |
| 1030 | ASV1425 | 0 | 3B_8  | Proteobacteria    | Rhizobiaceae         | Neorhizobium               | NA             |
| 1031 | ASV1425 | 0 | 3W_8  | Proteobacteria    | Rhizobiaceae         | Neorhizobium               | NA             |
| 1032 | ASV144  | 0 | 3W_8  | Nitrospirota      | Nitrospiraceae       | Nitrospira                 | NA             |
| 1033 | ASV144  | 0 | 3B_11 | Nitrospirota      | Nitrospiraceae       | Nitrospira                 | NA             |
| 1034 | ASV1449 | 0 | 3W_8  | Proteobacteria    | Acetobacteraceae     | Roseomonas                 | aquatica       |
| 1035 | ASV1449 | 0 | 3B_8  | Proteobacteria    | Acetobacteraceae     | Roseomonas                 | aquatica       |
| 1036 | ASV1449 | 0 | 3B_11 | Proteobacteria    | Acetobacteraceae     | Roseomonas                 | aquatica       |
| 1037 | ASV145  | 0 | 3W_8  | Verrucomicrobiota | Verrucomicrobiaceae  | Verrucomicrobium           | NA             |
| 1038 | ASV145  | 0 | 3B_11 | Verrucomicrobiota | Verrucomicrobiaceae  | Verrucomicrobium           | NA             |
| 1039 | ASV145  | 0 | 3B_8  | Verrucomicrobiota | Verrucomicrobiaceae  | Verrucomicrobium           | NA             |
| 1040 | ASV1450 | 0 | 3B_8  | Proteobacteria    | Paracaedibacteraceae | Candidatus Paracaedibacter | NA             |
| 1041 | ASV1450 | 0 | 3W_8  | Proteobacteria    | Paracaedibacteraceae | Candidatus Paracaedibacter | NA             |
| 1042 | ASV1450 | 0 | 3B_11 | Proteobacteria    | Paracaedibacteraceae | Candidatus Paracaedibacter | NA             |
| 1043 | ASV1453 | 0 | 3W_11 | Chloroflexi       | Anaerolineaceae      | Anaerolinea                | NA             |
| 1044 | ASV1453 | 0 | 3B_8  | Chloroflexi       | Anaerolineaceae      | Anaerolinea                | NA             |
| 1045 | ASV1453 | 0 | 3B_11 | Chloroflexi       | Anaerolineaceae      | Anaerolinea                | NA             |
| 1046 | ASV1467 | 0 | 3W_8  | Proteobacteria    | Xanthomonadaceae     | Lysobacter                 | dokdonensis    |
| 1047 | ASV1467 | 0 | 3B_8  | Proteobacteria    | Xanthomonadaceae     | Lysobacter                 | dokdonensis    |
| 1048 | ASV1467 | 0 | 3B_11 | Proteobacteria    | Xanthomonadaceae     | Lysobacter                 | dokdonensis    |
| 1049 | ASV1470 | 0 | 3W_8  | Actinobacteriota  | Micromonosporaceae   | Actinoplanes               | philippinensis |
| 1050 | ASV1470 | 0 | 3B_8  | Actinobacteriota  | Micromonosporaceae   | Actinoplanes               | philippinensis |
| 1051 | ASV1470 | 0 | 3B_11 | Actinobacteriota  | Micromonosporaceae   | Actinoplanes               | philippinensis |
| 1052 | ASV1480 | 0 | 3W_8  | Proteobacteria    | Sphingomonadaceae    | Sphingomonas               | hunanensis     |
| 1053 | ASV1480 | 0 | 3B_8  | Proteobacteria    | Sphingomonadaceae    | Sphingomonas               | hunanensis     |
| 1054 | ASV1480 | 0 | 3B_11 | Proteobacteria    | Sphingomonadaceae    | Sphingomonas               | hunanensis     |
| 1055 | ASV1485 | 0 | 3B_8  | Proteobacteria    | Rickettsiaceae       | Candidatus Cryptoprodotis  | NA             |
| 1056 | ASV1485 | 0 | 3W_8  | Proteobacteria    | Rickettsiaceae       | Candidatus Cryptoprodotis  | NA             |
| 1057 | ASV1485 | 0 | 3B_11 | Proteobacteria    | Rickettsiaceae       | Candidatus Cryptoprodotis  | NA             |
| 1058 | ASV1487 | 0 | 3B_8  | Actinobacteriota  | Nocardioidaceae      | Nocardioides               | ginkgobilobae  |
| 1059 | ASV1487 | 0 | 3W_8  | Actinobacteriota  | Nocardioidaceae      | Nocardioides               | ginkgobilobae  |
| 1060 | ASV1487 | 0 | 3B_11 | Actinobacteriota  | Nocardioidaceae      | Nocardioides               | ginkgobilobae  |
| 1061 | ASV149  | 0 | 3B_8  | Actinobacteriota  | Micrococcaceae       | Nesterenkonia              | NA             |
| 1062 | ASV1491 | 0 | 3W_8  | Proteobacteria    | Rhizobiaceae         | Aliihoeflea                | aestuarii      |
| 1063 | ASV1491 | 0 | 3B_8  | Proteobacteria    | Rhizobiaceae         | Aliihoeflea                | aestuarii      |
| 1064 | ASV1491 | 0 | 3B_11 | Proteobacteria    | Rhizobiaceae         | Aliihoeflea                | aestuarii      |
| 1065 | ASV1492 | 0 | 3W_8  | Proteobacteria    | Rhodobacteraceae     | Amaricoccus                | kaplicensis    |
| 1066 | ASV1492 | 0 | 3B_8  | Proteobacteria    | Rhodobacteraceae     | Amaricoccus                | kaplicensis    |
| 1067 | ASV1492 | 0 | 3B_11 | Proteobacteria    | Rhodobacteraceae     | Amaricoccus                | kaplicensis    |
| 1068 | ASV15   | 0 | 3B_8  | Proteobacteria    | Sphingomonadaceae    | Sphingobium                | NA             |
| 1069 | ASV150  | 0 | 3B_8  | Bacteroidota      | Sphingobacteriaceae  | Pedobacter                 | NA             |
| 1070 | ASV1504 | 0 | 3W_11 | Proteobacteria    | Dongiaceae           | Dongia                     | NA             |
| 1071 | ASV1504 | 0 | 3B_11 | Proteobacteria    | Dongiaceae           | Dongia                     | NA             |
| 1072 | ASV1504 | 0 | 3B_8  | Proteobacteria    | Dongiaceae           | Dongia                     | NA             |
| 1073 | ASV1505 | 0 | 3W_11 | Proteobacteria    | Oxalobacteraceae     | Actimicrobium              | NA             |
| 1074 | ASV1505 | 0 | 3W_8  | Proteobacteria    | Oxalobacteraceae     | Actimicrobium              | NA             |
| 1075 | ASV1505 | 0 | 3B_8  | Proteobacteria    | Oxalobacteraceae     | Actimicrobium              | NA             |
| 1076 | ASV1512 | 0 | 3W_8  | Proteobacteria    | Devosiaceae          | Arsenicitalea              | NA             |

|      |         |   |       |                  |                                |                       |                  |
|------|---------|---|-------|------------------|--------------------------------|-----------------------|------------------|
| 1077 | ASV1512 | 0 | 3B_11 | Proteobacteria   | Devosiaceae                    | Arsenicitalea         | NA               |
| 1078 | ASV1512 | 0 | 3B_8  | Proteobacteria   | Devosiaceae                    | Arsenicitalea         | NA               |
| 1079 | ASV152  | 0 | 3B_11 | Bacteroidota     | Microscillaceae                | Hassallia             | NA               |
| 1080 | ASV152  | 0 | 3B_8  | Bacteroidota     | Microscillaceae                | Hassallia             | NA               |
| 1081 | ASV152  | 0 | 3W_8  | Bacteroidota     | Microscillaceae                | Hassallia             | NA               |
| 1082 | ASV1527 | 0 | 3W_8  | Proteobacteria   | Beijerinckiaceae               | 1174-901-12           | NA               |
| 1083 | ASV1527 | 0 | 3B_11 | Proteobacteria   | Beijerinckiaceae               | 1174-901-12           | NA               |
| 1084 | ASV1527 | 0 | 3B_8  | Proteobacteria   | Beijerinckiaceae               | 1174-901-12           | NA               |
| 1085 | ASV1535 | 0 | 3B_8  | Proteobacteria   | Neisseriaceae                  | Neisseria             | NA               |
| 1086 | ASV1535 | 0 | 3B_11 | Proteobacteria   | Neisseriaceae                  | Neisseria             | NA               |
| 1087 | ASV1535 | 0 | 3W_11 | Proteobacteria   | Neisseriaceae                  | Neisseria             | NA               |
| 1088 | ASV1544 | 0 | 3W_8  | Proteobacteria   | Rhizobiaceae                   | Pseudochrobactrum     | NA               |
| 1089 | ASV1544 | 0 | 3B_11 | Proteobacteria   | Rhizobiaceae                   | Pseudochrobactrum     | NA               |
| 1090 | ASV1544 | 0 | 3B_8  | Proteobacteria   | Rhizobiaceae                   | Pseudochrobactrum     | NA               |
| 1091 | ASV1547 | 0 | 3B_8  | Firmicutes       | Planococcaceae                 | Domibacillus          | NA               |
| 1092 | ASV1547 | 0 | 3W_8  | Firmicutes       | Planococcaceae                 | Domibacillus          | NA               |
| 1093 | ASV1547 | 0 | 3B_11 | Firmicutes       | Planococcaceae                 | Domibacillus          | NA               |
| 1094 | ASV155  | 0 | 3B_11 | Bdellovibrionota | Bacteriovoracaceae             | Bacteriovorax         | NA               |
| 1095 | ASV155  | 0 | 3W_8  | Bdellovibrionota | Bacteriovoracaceae             | Bacteriovorax         | NA               |
| 1096 | ASV1556 | 0 | 3B_8  | Bacteroidota     | Weeksellaceae                  | Moheibacter           | sediminis        |
| 1097 | ASV1556 | 0 | 3W_8  | Bacteroidota     | Weeksellaceae                  | Moheibacter           | sediminis        |
| 1098 | ASV1556 | 0 | 3B_11 | Bacteroidota     | Weeksellaceae                  | Moheibacter           | sediminis        |
| 1099 | ASV156  | 0 | 3W_8  | Actinobacteriota | Nocardiaceae                   | Rhodococcus           | NA               |
| 1100 | ASV156  | 0 | 3B_11 | Actinobacteriota | Nocardiaceae                   | Rhodococcus           | NA               |
| 1101 | ASV156  | 0 | 3B_8  | Actinobacteriota | Nocardiaceae                   | Rhodococcus           | NA               |
| 1102 | ASV1562 | 0 | 3B_8  | Proteobacteria   | Hydrogenophilaceae             | Tepidiphilus          | succinatimandens |
| 1103 | ASV1562 | 0 | 3W_8  | Proteobacteria   | Hydrogenophilaceae             | Tepidiphilus          | succinatimandens |
| 1104 | ASV1562 | 0 | 3B_11 | Proteobacteria   | Hydrogenophilaceae             | Tepidiphilus          | succinatimandens |
| 1105 | ASV1569 | 0 | 3W_8  | Bacteroidota     | Prevotellaceae                 | Prevotella_7          | melaninogenica   |
| 1106 | ASV1569 | 0 | 3B_11 | Bacteroidota     | Prevotellaceae                 | Prevotella_7          | melaninogenica   |
| 1107 | ASV1569 | 0 | 3B_8  | Bacteroidota     | Prevotellaceae                 | Prevotella_7          | melaninogenica   |
| 1108 | ASV157  | 0 | 3B_8  | Actinobacteriota | Pseudonocardiaceae             | Pseudonocardia        | NA               |
| 1109 | ASV157  | 0 | 3W_8  | Actinobacteriota | Pseudonocardiaceae             | Pseudonocardia        | NA               |
| 1110 | ASV1572 | 0 | 3B_8  | Firmicutes       | Lachnospiraceae                | Mobilitalea           | NA               |
| 1111 | ASV1572 | 0 | 3B_11 | Firmicutes       | Lachnospiraceae                | Mobilitalea           | NA               |
| 1112 | ASV1572 | 0 | 3W_11 | Firmicutes       | Lachnospiraceae                | Mobilitalea           | NA               |
| 1113 | ASV1573 | 0 | 3W_11 | Proteobacteria   | Burkholderiaceae               | Ralstonia             | NA               |
| 1114 | ASV1573 | 0 | 3B_11 | Proteobacteria   | Burkholderiaceae               | Ralstonia             | NA               |
| 1115 | ASV1573 | 0 | 3B_8  | Proteobacteria   | Burkholderiaceae               | Ralstonia             | NA               |
| 1116 | ASV1574 | 0 | 3B_11 | Bacteroidota     | Prevotellaceae                 | Prevotella_7          | NA               |
| 1117 | ASV1574 | 0 | 3B_8  | Bacteroidota     | Prevotellaceae                 | Prevotella_7          | NA               |
| 1118 | ASV1579 | 0 | 3B_8  | Proteobacteria   | Puniceispirillales Incertae Se | Constrictibacter      | NA               |
| 1119 | ASV1579 | 0 | 3B_11 | Proteobacteria   | Puniceispirillales Incertae Se | Constrictibacter      | NA               |
| 1120 | ASV1579 | 0 | 3W_8  | Proteobacteria   | Puniceispirillales Incertae Se | Constrictibacter      | NA               |
| 1121 | ASV1583 | 0 | 3W_8  | Planctomycetota  | Isosphaeraceae                 | Paludisphaera         | NA               |
| 1122 | ASV1583 | 0 | 3B_11 | Planctomycetota  | Isosphaeraceae                 | Paludisphaera         | NA               |
| 1123 | ASV1583 | 0 | 3B_8  | Planctomycetota  | Isosphaeraceae                 | Paludisphaera         | NA               |
| 1124 | ASV1585 | 0 | 3B_11 | Firmicutes       | Bacillaceae                    | Pseudogracidibacillus | NA               |
| 1125 | ASV1585 | 0 | 3B_8  | Firmicutes       | Bacillaceae                    | Pseudogracidibacillus | NA               |

|      |         |   |       |                  |                            |                             |               |
|------|---------|---|-------|------------------|----------------------------|-----------------------------|---------------|
| 1126 | ASV1585 | 0 | 3W_8  | Firmicutes       | Bacillaceae                | Pseudogracilibacillus       | NA            |
| 1127 | ASV1586 | 0 | 3W_8  | Bacteroidota     | Spirosomaceae              | Spirosoma                   | NA            |
| 1128 | ASV1586 | 0 | 3B_8  | Bacteroidota     | Spirosomaceae              | Spirosoma                   | NA            |
| 1129 | ASV1586 | 0 | 3B_11 | Bacteroidota     | Spirosomaceae              | Spirosoma                   | NA            |
| 1130 | ASV1595 | 0 | 3W_8  | Proteobacteria   | Rhizobiales Incertae Sedis | Alsobacter                  | metallidurans |
| 1131 | ASV1595 | 0 | 3B_8  | Proteobacteria   | Rhizobiales Incertae Sedis | Alsobacter                  | metallidurans |
| 1132 | ASV1595 | 0 | 3B_11 | Proteobacteria   | Rhizobiales Incertae Sedis | Alsobacter                  | metallidurans |
| 1133 | ASV1600 | 0 | 3B_8  | Proteobacteria   | Pasteurellaceae            | Haemophilus                 | NA            |
| 1134 | ASV1607 | 0 | 3B_8  | Chloroflexi      | A4b                        | OLB13                       | NA            |
| 1135 | ASV1607 | 0 | 3B_11 | Chloroflexi      | A4b                        | OLB13                       | NA            |
| 1136 | ASV1607 | 0 | 3W_8  | Chloroflexi      | A4b                        | OLB13                       | NA            |
| 1137 | ASV161  | 0 | 3B_8  | Actinobacteriota | Thermomonosporaceae        | Actinoallomurus             | NA            |
| 1138 | ASV161  | 0 | 3B_11 | Actinobacteriota | Thermomonosporaceae        | Actinoallomurus             | NA            |
| 1139 | ASV161  | 0 | 3W_11 | Actinobacteriota | Thermomonosporaceae        | Actinoallomurus             | NA            |
| 1140 | ASV1618 | 0 | 3B_8  | Proteobacteria   | Sphingomonadaceae          | Sphingorhabdus              | wooponensis   |
| 1141 | ASV1618 | 0 | 3W_8  | Proteobacteria   | Sphingomonadaceae          | Sphingorhabdus              | wooponensis   |
| 1142 | ASV1618 | 0 | 3B_11 | Proteobacteria   | Sphingomonadaceae          | Sphingorhabdus              | wooponensis   |
| 1143 | ASV1633 | 0 | 3B_8  | Planctomycetota  | Rubinisphaeraceae          | Planctomicrobium            | NA            |
| 1144 | ASV1633 | 0 | 3W_8  | Planctomycetota  | Rubinisphaeraceae          | Planctomicrobium            | NA            |
| 1145 | ASV1633 | 0 | 3B_11 | Planctomycetota  | Rubinisphaeraceae          | Planctomicrobium            | NA            |
| 1146 | ASV1635 | 0 | 3B_8  | Actinobacteriota | Dietziaceae                | Dietzia                     | NA            |
| 1147 | ASV1635 | 0 | 3B_11 | Actinobacteriota | Dietziaceae                | Dietzia                     | NA            |
| 1148 | ASV1635 | 0 | 3W_8  | Actinobacteriota | Dietziaceae                | Dietzia                     | NA            |
| 1149 | ASV1636 | 0 | 3B_8  | Actinobacteriota | Micromonosporaceae         | Actinoplanes                | sarveparensis |
| 1150 | ASV1636 | 0 | 3W_8  | Actinobacteriota | Micromonosporaceae         | Actinoplanes                | sarveparensis |
| 1151 | ASV1636 | 0 | 3B_11 | Actinobacteriota | Micromonosporaceae         | Actinoplanes                | sarveparensis |
| 1152 | ASV1637 | 0 | 3W_8  | Firmicutes       | Clostridiaceae             | Clostridium sensu stricto 1 | butyricum     |
| 1153 | ASV1637 | 0 | 3B_11 | Firmicutes       | Clostridiaceae             | Clostridium sensu stricto 1 | butyricum     |
| 1154 | ASV1637 | 0 | 3B_8  | Firmicutes       | Clostridiaceae             | Clostridium sensu stricto 1 | butyricum     |
| 1155 | ASV1669 | 0 | 3W_8  | Gemmatimonadota  | Gemmatimonadaceae          | Roseisolibacter             | NA            |
| 1156 | ASV1669 | 0 | 3B_8  | Gemmatimonadota  | Gemmatimonadaceae          | Roseisolibacter             | NA            |
| 1157 | ASV1669 | 0 | 3B_11 | Gemmatimonadota  | Gemmatimonadaceae          | Roseisolibacter             | NA            |
| 1158 | ASV1670 | 0 | 3B_8  | Planctomycetota  | Isosphaeraceae             | Aquisphaera                 | NA            |
| 1159 | ASV1670 | 0 | 3B_11 | Planctomycetota  | Isosphaeraceae             | Aquisphaera                 | NA            |
| 1160 | ASV1670 | 0 | 3W_8  | Planctomycetota  | Isosphaeraceae             | Aquisphaera                 | NA            |
| 1161 | ASV1672 | 0 | 3B_8  | Actinobacteriota | Ilumatobacteraceae         | CL500-29 marine group       | NA            |
| 1162 | ASV1672 | 0 | 3B_11 | Actinobacteriota | Ilumatobacteraceae         | CL500-29 marine group       | NA            |
| 1163 | ASV1672 | 0 | 3W_8  | Actinobacteriota | Ilumatobacteraceae         | CL500-29 marine group       | NA            |
| 1164 | ASV1674 | 0 | 3B_8  | Bacteroidota     | Saprosiraceae              | Haliscomenobacter           | NA            |
| 1165 | ASV1674 | 0 | 3B_11 | Bacteroidota     | Saprosiraceae              | Haliscomenobacter           | NA            |
| 1166 | ASV1674 | 0 | 3W_8  | Bacteroidota     | Saprosiraceae              | Haliscomenobacter           | NA            |
| 1167 | ASV1682 | 0 | 3B_8  | Proteobacteria   | Portioccaceae              | C1-B045                     | NA            |
| 1168 | ASV1682 | 0 | 3B_11 | Proteobacteria   | Portioccaceae              | C1-B045                     | NA            |
| 1169 | ASV1682 | 0 | 3W_8  | Proteobacteria   | Portioccaceae              | C1-B045                     | NA            |
| 1170 | ASV1684 | 0 | 3B_8  | Proteobacteria   | Rhodobacteraceae           | Amaricoccus                 | tamworthensis |
| 1171 | ASV1684 | 0 | 3W_8  | Proteobacteria   | Rhodobacteraceae           | Amaricoccus                 | tamworthensis |
| 1172 | ASV1684 | 0 | 3B_11 | Proteobacteria   | Rhodobacteraceae           | Amaricoccus                 | tamworthensis |
| 1173 | ASV1686 | 0 | 3B_8  | Firmicutes       | Gemellaceae                | Gemella                     | NA            |
| 1174 | ASV1686 | 0 | 3W_8  | Firmicutes       | Gemellaceae                | Gemella                     | NA            |

|      |         |   |       |                  |                              |                    |              |
|------|---------|---|-------|------------------|------------------------------|--------------------|--------------|
| 1175 | ASV1686 | 0 | 3B_11 | Firmicutes       | Gemellaceae                  | Gemella            | NA           |
| 1176 | ASV1688 | 0 | 3B_8  | Bacteroidota     | Saprospiraceae               | Phaeodactylibacter | NA           |
| 1177 | ASV1688 | 0 | 3B_11 | Bacteroidota     | Saprospiraceae               | Phaeodactylibacter | NA           |
| 1178 | ASV1688 | 0 | 3W_8  | Bacteroidota     | Saprospiraceae               | Phaeodactylibacter | NA           |
| 1179 | ASV1690 | 0 | 3B_8  | Proteobacteria   | Xanthomonadaceae             | Pseudoxanthomonas  | taiwanensis  |
| 1180 | ASV1690 | 0 | 3B_11 | Proteobacteria   | Xanthomonadaceae             | Pseudoxanthomonas  | taiwanensis  |
| 1181 | ASV1691 | 0 | 3W_8  | Firmicutes       | Family XI                    | Anaerococcus       | NA           |
| 1182 | ASV1691 | 0 | 3B_8  | Firmicutes       | Family XI                    | Anaerococcus       | NA           |
| 1183 | ASV1691 | 0 | 3W_11 | Firmicutes       | Family XI                    | Anaerococcus       | NA           |
| 1184 | ASV17   | 0 | 3B_11 | Bacteroidota     | Chitinophagaceae             | Sediminibacterium  | salmonium    |
| 1185 | ASV17   | 0 | 3B_8  | Bacteroidota     | Chitinophagaceae             | Sediminibacterium  | salmonium    |
| 1186 | ASV171  | 0 | 3W_8  | Proteobacteria   | Caulobacteraceae             | Caulobacter        | fusififormis |
| 1187 | ASV171  | 0 | 3B_8  | Proteobacteria   | Caulobacteraceae             | Caulobacter        | fusififormis |
| 1188 | ASV171  | 0 | 3B_11 | Proteobacteria   | Caulobacteraceae             | Caulobacter        | fusififormis |
| 1189 | ASV1724 | 0 | 3B_8  | Actinobacteriota | Streptosporangiales Incertae | Motilibacter       | NA           |
| 1190 | ASV1724 | 0 | 3W_8  | Actinobacteriota | Streptosporangiales Incertae | Motilibacter       | NA           |
| 1191 | ASV1724 | 0 | 3B_11 | Actinobacteriota | Streptosporangiales Incertae | Motilibacter       | NA           |
| 1192 | ASV1741 | 0 | 3B_8  | Actinobacteriota | Rubrobacteriaceae            | Rubrobacter        | NA           |
| 1193 | ASV1741 | 0 | 3B_11 | Actinobacteriota | Rubrobacteriaceae            | Rubrobacter        | NA           |
| 1194 | ASV1741 | 0 | 3W_8  | Actinobacteriota | Rubrobacteriaceae            | Rubrobacter        | NA           |
| 1195 | ASV1747 | 0 | 3B_8  | Proteobacteria   | Caulobacteraceae             | PMMR1              | NA           |
| 1196 | ASV1747 | 0 | 3B_11 | Proteobacteria   | Caulobacteraceae             | PMMR1              | NA           |
| 1197 | ASV1747 | 0 | 3W_8  | Proteobacteria   | Caulobacteraceae             | PMMR1              | NA           |
| 1198 | ASV1761 | 0 | 3B_8  | Armatimonadota   | Armatimonadaceae             | Armatimonas        | NA           |
| 1199 | ASV1761 | 0 | 3B_11 | Armatimonadota   | Armatimonadaceae             | Armatimonas        | NA           |
| 1200 | ASV1761 | 0 | 3W_8  | Armatimonadota   | Armatimonadaceae             | Armatimonas        | NA           |
| 1201 | ASV1769 | 0 | 3B_8  | Bacteroidota     | Sphingobacteriaceae          | Pedobacter         | lignilitoris |
| 1202 | ASV1769 | 0 | 3W_8  | Bacteroidota     | Sphingobacteriaceae          | Pedobacter         | lignilitoris |
| 1203 | ASV1769 | 0 | 3B_11 | Bacteroidota     | Sphingobacteriaceae          | Pedobacter         | lignilitoris |
| 1204 | ASV178  | 0 | 3B_8  | Proteobacteria   | Steroidobacteraceae          | Steroidobacter     | NA           |
| 1205 | ASV178  | 0 | 3W_8  | Proteobacteria   | Steroidobacteraceae          | Steroidobacter     | NA           |
| 1206 | ASV178  | 0 | 3B_11 | Proteobacteria   | Steroidobacteraceae          | Steroidobacter     | NA           |
| 1207 | ASV1780 | 0 | 3W_11 | Proteobacteria   | Rhodocyclaceae               | Thauera            | NA           |
| 1208 | ASV1780 | 0 | 3B_8  | Proteobacteria   | Rhodocyclaceae               | Thauera            | NA           |
| 1209 | ASV1780 | 0 | 3B_11 | Proteobacteria   | Rhodocyclaceae               | Thauera            | NA           |
| 1210 | ASV1787 | 0 | 3W_11 | Proteobacteria   | Methylophilaceae             | Methylotenera      | NA           |
| 1211 | ASV1787 | 0 | 3B_11 | Proteobacteria   | Methylophilaceae             | Methylotenera      | NA           |
| 1212 | ASV1787 | 0 | 3W_8  | Proteobacteria   | Methylophilaceae             | Methylotenera      | NA           |
| 1213 | ASV18   | 0 | 3W_8  | Bacteroidota     | Sphingobacteriaceae          | Pedobacter         | bauzanensis  |
| 1214 | ASV18   | 0 | 3B_8  | Bacteroidota     | Sphingobacteriaceae          | Pedobacter         | bauzanensis  |
| 1215 | ASV18   | 0 | 3B_11 | Bacteroidota     | Sphingobacteriaceae          | Pedobacter         | bauzanensis  |
| 1216 | ASV181  | 0 | 3B_11 | Firmicutes       | Caldalkalibacillaceae        | Caldalkalibacillus | NA           |
| 1217 | ASV1811 | 0 | 3W_8  | Bacteroidota     | Chitinophagaceae             | Chitinophaga       | NA           |
| 1218 | ASV1811 | 0 | 3B_11 | Bacteroidota     | Chitinophagaceae             | Chitinophaga       | NA           |
| 1219 | ASV1811 | 0 | 3B_8  | Bacteroidota     | Chitinophagaceae             | Chitinophaga       | NA           |
| 1220 | ASV1815 | 0 | 3B_8  | Bacteroidota     | Paludibacteraceae            | Paludibacter       | NA           |
| 1221 | ASV1815 | 0 | 3B_11 | Bacteroidota     | Paludibacteraceae            | Paludibacter       | NA           |
| 1222 | ASV1815 | 0 | 3W_11 | Bacteroidota     | Paludibacteraceae            | Paludibacter       | NA           |
| 1223 | ASV1818 | 0 | 3B_8  | Firmicutes       | Staphylococcaceae            | Jeotgalicoccus     | NA           |

|      |         |   |       |                  |                            |                    |                |
|------|---------|---|-------|------------------|----------------------------|--------------------|----------------|
| 1224 | ASV1818 | 0 | 3W_8  | Firmicutes       | Staphylococcaceae          | Jeotgalicoccus     | NA             |
| 1225 | ASV1818 | 0 | 3W_11 | Firmicutes       | Staphylococcaceae          | Jeotgalicoccus     | NA             |
| 1226 | ASV182  | 0 | 3B_8  | Acidobacteriota  | Blastocatellaceae          | Stenotrophobacter  | NA             |
| 1227 | ASV182  | 0 | 3W_8  | Acidobacteriota  | Blastocatellaceae          | Stenotrophobacter  | NA             |
| 1228 | ASV182  | 0 | 3B_11 | Acidobacteriota  | Blastocatellaceae          | Stenotrophobacter  | NA             |
| 1229 | ASV1821 | 0 | 3W_8  | Actinobacteriota | Gaiellaceae                | Gaiella            | NA             |
| 1230 | ASV1821 | 0 | 3B_8  | Actinobacteriota | Gaiellaceae                | Gaiella            | NA             |
| 1231 | ASV1821 | 0 | 3B_11 | Actinobacteriota | Gaiellaceae                | Gaiella            | NA             |
| 1232 | ASV1828 | 0 | 3B_8  | Actinobacteriota | Micromonosporaceae         | Actinoplanes       | atraurantiacus |
| 1233 | ASV1828 | 0 | 3B_11 | Actinobacteriota | Micromonosporaceae         | Actinoplanes       | atraurantiacus |
| 1234 | ASV1828 | 0 | 3W_8  | Actinobacteriota | Micromonosporaceae         | Actinoplanes       | atraurantiacus |
| 1235 | ASV1835 | 0 | 3B_8  | Actinobacteriota | Frankiaceae                | Jatrophihabitans   | NA             |
| 1236 | ASV1835 | 0 | 3W_8  | Actinobacteriota | Frankiaceae                | Jatrophihabitans   | NA             |
| 1237 | ASV1835 | 0 | 3B_11 | Actinobacteriota | Frankiaceae                | Jatrophihabitans   | NA             |
| 1238 | ASV1839 | 0 | 3B_8  | Firmicutes       | Planococcaceae             | Lysinibacillus     | NA             |
| 1239 | ASV1839 | 0 | 3W_11 | Firmicutes       | Planococcaceae             | Lysinibacillus     | NA             |
| 1240 | ASV1839 | 0 | 3B_11 | Firmicutes       | Planococcaceae             | Lysinibacillus     | NA             |
| 1241 | ASV184  | 0 | 3B_8  | Deinococcota     | Deinococcaceae             | Deinococcus        | NA             |
| 1242 | ASV184  | 0 | 3W_8  | Deinococcota     | Deinococcaceae             | Deinococcus        | NA             |
| 1243 | ASV184  | 0 | 3B_11 | Deinococcota     | Deinococcaceae             | Deinococcus        | NA             |
| 1244 | ASV1840 | 0 | 3B_8  | Actinobacteriota | Corynebacteriaceae         | Corynebacterium    | jeikeium       |
| 1245 | ASV1840 | 0 | 3W_11 | Actinobacteriota | Corynebacteriaceae         | Corynebacterium    | jeikeium       |
| 1246 | ASV1840 | 0 | 3W_8  | Actinobacteriota | Corynebacteriaceae         | Corynebacterium    | jeikeium       |
| 1247 | ASV1851 | 0 | 3W_8  | Bacteroidota     | Chitinophagaceae           | Aurantisolimonas   | NA             |
| 1248 | ASV1851 | 0 | 3B_8  | Bacteroidota     | Chitinophagaceae           | Aurantisolimonas   | NA             |
| 1249 | ASV1851 | 0 | 3B_11 | Bacteroidota     | Chitinophagaceae           | Aurantisolimonas   | NA             |
| 1250 | ASV1853 | 0 | 3W_8  | Sumerlaeota      | Sumerlaeaceae              | Sumerlaea          | NA             |
| 1251 | ASV1853 | 0 | 3B_11 | Sumerlaeota      | Sumerlaeaceae              | Sumerlaea          | NA             |
| 1252 | ASV1853 | 0 | 3B_8  | Sumerlaeota      | Sumerlaeaceae              | Sumerlaea          | NA             |
| 1253 | ASV186  | 0 | 3W_11 | Proteobacteria   | Sphingomonadaceae          | Porphyrobacter     | NA             |
| 1254 | ASV1863 | 0 | 3W_8  | Firmicutes       | Peptostreptococcaceae      | Romboutsia         | NA             |
| 1255 | ASV1863 | 0 | 3B_8  | Firmicutes       | Peptostreptococcaceae      | Romboutsia         | NA             |
| 1256 | ASV1863 | 0 | 3B_11 | Firmicutes       | Peptostreptococcaceae      | Romboutsia         | NA             |
| 1257 | ASV1865 | 0 | 3B_8  | Cyanobacteria    | Nostocaceae                | Calothrix PCC-6303 | NA             |
| 1258 | ASV1865 | 0 | 3B_11 | Cyanobacteria    | Nostocaceae                | Calothrix PCC-6303 | NA             |
| 1259 | ASV1865 | 0 | 3W_8  | Cyanobacteria    | Nostocaceae                | Calothrix PCC-6303 | NA             |
| 1260 | ASV1868 | 0 | 3W_8  | Proteobacteria   | Rhizobiales Incertae Sedis | Bauldia            | NA             |
| 1261 | ASV1868 | 0 | 3B_11 | Proteobacteria   | Rhizobiales Incertae Sedis | Bauldia            | NA             |
| 1262 | ASV1868 | 0 | 3B_8  | Proteobacteria   | Rhizobiales Incertae Sedis | Bauldia            | NA             |
| 1263 | ASV1875 | 0 | 3B_11 | Proteobacteria   | Xanthomonadaceae           | Stenotrophomonas   | maltophilia    |
| 1264 | ASV1875 | 0 | 3B_8  | Proteobacteria   | Xanthomonadaceae           | Stenotrophomonas   | maltophilia    |
| 1265 | ASV1875 | 0 | 3W_11 | Proteobacteria   | Xanthomonadaceae           | Stenotrophomonas   | maltophilia    |
| 1266 | ASV1879 | 0 | 3W_11 | Bacteroidota     | Hymenobacteraceae          | Hymenobacter       | NA             |
| 1267 | ASV1879 | 0 | 3W_8  | Bacteroidota     | Hymenobacteraceae          | Hymenobacter       | NA             |
| 1268 | ASV1879 | 0 | 3B_8  | Bacteroidota     | Hymenobacteraceae          | Hymenobacter       | NA             |
| 1269 | ASV188  | 0 | 3B_11 | Bdellovibrionota | Bacteriovoracaceae         | Peredibacter       | NA             |
| 1270 | ASV188  | 0 | 3B_8  | Bdellovibrionota | Bacteriovoracaceae         | Peredibacter       | NA             |
| 1271 | ASV1881 | 0 | 3W_11 | Bacteroidota     | Prevotellaceae             | Prevotella         | timonensis     |
| 1272 | ASV1881 | 0 | 3W_8  | Bacteroidota     | Prevotellaceae             | Prevotella         | timonensis     |

|      |         |   |       |                   |                        |                   |             |
|------|---------|---|-------|-------------------|------------------------|-------------------|-------------|
| 1273 | ASV1881 | 0 | 3B_11 | Bacteroidota      | Prevotellaceae         | Prevotella        | timonensis  |
| 1274 | ASV1888 | 0 | 3W_8  | Proteobacteria    | Xanthomonadaceae       | Luteimonas        | terricola   |
| 1275 | ASV1888 | 0 | 3B_11 | Proteobacteria    | Xanthomonadaceae       | Luteimonas        | terricola   |
| 1276 | ASV1888 | 0 | 3B_8  | Proteobacteria    | Xanthomonadaceae       | Luteimonas        | terricola   |
| 1277 | ASV189  | 0 | 3B_8  | Firmicutes        | Planococcaceae         | Chungangia        | NA          |
| 1278 | ASV189  | 0 | 3W_11 | Firmicutes        | Planococcaceae         | Chungangia        | NA          |
| 1279 | ASV189  | 0 | 3B_11 | Firmicutes        | Planococcaceae         | Chungangia        | NA          |
| 1280 | ASV1892 | 0 | 3W_8  | Deinococcota      | Deinococcaceae         | Deinobacterium    | NA          |
| 1281 | ASV1892 | 0 | 3B_8  | Deinococcota      | Deinococcaceae         | Deinobacterium    | NA          |
| 1282 | ASV1892 | 0 | 3B_11 | Deinococcota      | Deinococcaceae         | Deinobacterium    | NA          |
| 1283 | ASV19   | 0 | 3W_8  | Proteobacteria    | Xanthobacteraceae      | Afipia            | NA          |
| 1284 | ASV1906 | 0 | 3B_11 | Proteobacteria    | Nitrosomonadaceae      | Nitrosomonas      | oligotropha |
| 1285 | ASV1906 | 0 | 3W_8  | Proteobacteria    | Nitrosomonadaceae      | Nitrosomonas      | oligotropha |
| 1286 | ASV1906 | 0 | 3B_8  | Proteobacteria    | Nitrosomonadaceae      | Nitrosomonas      | oligotropha |
| 1287 | ASV191  | 0 | 3B_8  | Actinobacteriota  | Micrococcaceae         | Pseudarthrobacter | NA          |
| 1288 | ASV191  | 0 | 3B_11 | Actinobacteriota  | Micrococcaceae         | Pseudarthrobacter | NA          |
| 1289 | ASV191  | 0 | 3W_8  | Actinobacteriota  | Micrococcaceae         | Pseudarthrobacter | NA          |
| 1290 | ASV1927 | 0 | 3B_11 | Bacteroidota      | Chitinophagaceae       | Cnuella           | NA          |
| 1291 | ASV1927 | 0 | 3B_8  | Bacteroidota      | Chitinophagaceae       | Cnuella           | NA          |
| 1292 | ASV1927 | 0 | 3W_8  | Bacteroidota      | Chitinophagaceae       | Cnuella           | NA          |
| 1293 | ASV1941 | 0 | 3B_8  | Firmicutes        | Thermoactinomycetaceae | Thermoactinomyces | vulgaris    |
| 1294 | ASV1941 | 0 | 3W_8  | Firmicutes        | Thermoactinomycetaceae | Thermoactinomyces | vulgaris    |
| 1295 | ASV1941 | 0 | 3W_11 | Firmicutes        | Thermoactinomycetaceae | Thermoactinomyces | vulgaris    |
| 1296 | ASV195  | 0 | 3B_8  | Proteobacteria    | Xanthomonadaceae       | Thermomonas       | brevis      |
| 1297 | ASV195  | 0 | 3B_11 | Proteobacteria    | Xanthomonadaceae       | Thermomonas       | brevis      |
| 1298 | ASV195  | 0 | 3W_8  | Proteobacteria    | Xanthomonadaceae       | Thermomonas       | brevis      |
| 1299 | ASV196  | 0 | 3B_8  | Actinobacteriota  | Nocardioideae          | Nocardioides      | alpinus     |
| 1300 | ASV196  | 0 | 3B_11 | Actinobacteriota  | Nocardioideae          | Nocardioides      | alpinus     |
| 1301 | ASV196  | 0 | 3W_8  | Actinobacteriota  | Nocardioideae          | Nocardioides      | alpinus     |
| 1302 | ASV1963 | 0 | 3W_8  | Chloroflexi       | Herpetosiphonaceae     | Herpetosiphon     | NA          |
| 1303 | ASV1963 | 0 | 3B_8  | Chloroflexi       | Herpetosiphonaceae     | Herpetosiphon     | NA          |
| 1304 | ASV1963 | 0 | 3B_11 | Chloroflexi       | Herpetosiphonaceae     | Herpetosiphon     | NA          |
| 1305 | ASV1967 | 0 | 3W_8  | Actinobacteriota  | Nocardioideae          | Kribbella         | NA          |
| 1306 | ASV1967 | 0 | 3B_11 | Actinobacteriota  | Nocardioideae          | Kribbella         | NA          |
| 1307 | ASV1967 | 0 | 3B_8  | Actinobacteriota  | Nocardioideae          | Kribbella         | NA          |
| 1308 | ASV197  | 0 | 3B_8  | Acidobacteriota   | Vicinamibacteraceae    | Vicinamibacter    | NA          |
| 1309 | ASV197  | 0 | 3B_11 | Acidobacteriota   | Vicinamibacteraceae    | Vicinamibacter    | NA          |
| 1310 | ASV197  | 0 | 3W_8  | Acidobacteriota   | Vicinamibacteraceae    | Vicinamibacter    | NA          |
| 1311 | ASV1980 | 0 | 3B_8  | Firmicutes        | Sedimentibacteraceae   | Sedimentibacter   | NA          |
| 1312 | ASV1980 | 0 | 3B_11 | Firmicutes        | Sedimentibacteraceae   | Sedimentibacter   | NA          |
| 1313 | ASV1980 | 0 | 3W_11 | Firmicutes        | Sedimentibacteraceae   | Sedimentibacter   | NA          |
| 1314 | ASV1990 | 0 | 3B_11 | Bacteroidota      | Porphyromonadaceae     | Porphyromonas     | NA          |
| 1315 | ASV1990 | 0 | 3W_11 | Bacteroidota      | Porphyromonadaceae     | Porphyromonas     | NA          |
| 1316 | ASV1990 | 0 | 3W_8  | Bacteroidota      | Porphyromonadaceae     | Porphyromonas     | NA          |
| 1317 | ASV200  | 0 | 3B_8  | Bacteroidota      | Flavobacteriaceae      | Flavobacterium    | tegetincola |
| 1318 | ASV200  | 0 | 3W_8  | Bacteroidota      | Flavobacteriaceae      | Flavobacterium    | tegetincola |
| 1319 | ASV200  | 0 | 3B_11 | Bacteroidota      | Flavobacteriaceae      | Flavobacterium    | tegetincola |
| 1320 | ASV2001 | 0 | 3B_8  | Verrucomicrobiota | Pedosphaeraceae        | Oikopleura        | NA          |
| 1321 | ASV2001 | 0 | 3B_11 | Verrucomicrobiota | Pedosphaeraceae        | Oikopleura        | NA          |

|      |         |   |       |                   |                              |                     |                |
|------|---------|---|-------|-------------------|------------------------------|---------------------|----------------|
| 1322 | ASV2001 | 0 | 3W_8  | Verrucomicrobiota | Pedosphaeraceae              | Oikopleura          | NA             |
| 1323 | ASV2012 | 0 | 3B_8  | Proteobacteria    | Diplorickettsiaceae          | Rickettsiella       | NA             |
| 1324 | ASV2012 | 0 | 3B_11 | Proteobacteria    | Diplorickettsiaceae          | Rickettsiella       | NA             |
| 1325 | ASV2012 | 0 | 3W_8  | Proteobacteria    | Diplorickettsiaceae          | Rickettsiella       | NA             |
| 1326 | ASV2018 | 0 | 3B_8  | Firmicutes        | Streptococcaceae             | Lactococcus         | NA             |
| 1327 | ASV2018 | 0 | 3W_8  | Firmicutes        | Streptococcaceae             | Lactococcus         | NA             |
| 1328 | ASV2018 | 0 | 3W_11 | Firmicutes        | Streptococcaceae             | Lactococcus         | NA             |
| 1329 | ASV2019 | 0 | 3W_8  | Firmicutes        | Carnobacteriaceae            | Alloiococcus        | otitis         |
| 1330 | ASV2019 | 0 | 3W_11 | Firmicutes        | Carnobacteriaceae            | Alloiococcus        | otitis         |
| 1331 | ASV2019 | 0 | 3B_8  | Firmicutes        | Carnobacteriaceae            | Alloiococcus        | otitis         |
| 1332 | ASV202  | 0 | 3B_8  | Proteobacteria    | Methylophilaceae             | Methylophilus       | NA             |
| 1333 | ASV202  | 0 | 3W_8  | Proteobacteria    | Methylophilaceae             | Methylophilus       | NA             |
| 1334 | ASV202  | 0 | 3B_11 | Proteobacteria    | Methylophilaceae             | Methylophilus       | NA             |
| 1335 | ASV2021 | 0 | 3W_11 | Spirochaetota     | Spirochaetaceae              | Treponema           | NA             |
| 1336 | ASV2021 | 0 | 3W_8  | Spirochaetota     | Spirochaetaceae              | Treponema           | NA             |
| 1337 | ASV2021 | 0 | 3B_8  | Spirochaetota     | Spirochaetaceae              | Treponema           | NA             |
| 1338 | ASV2026 | 0 | 3W_11 | Proteobacteria    | Acetobacteraceae             | Rhodopila           | NA             |
| 1339 | ASV2026 | 0 | 3W_8  | Proteobacteria    | Acetobacteraceae             | Rhodopila           | NA             |
| 1340 | ASV2026 | 0 | 3B_11 | Proteobacteria    | Acetobacteraceae             | Rhodopila           | NA             |
| 1341 | ASV2034 | 0 | 3W_8  | Acidobacteriota   | Acidobacteriaceae (Subgroup) | Granulicella        | NA             |
| 1342 | ASV2034 | 0 | 3B_11 | Acidobacteriota   | Acidobacteriaceae (Subgroup) | Granulicella        | NA             |
| 1343 | ASV2034 | 0 | 3B_8  | Acidobacteriota   | Acidobacteriaceae (Subgroup) | Granulicella        | NA             |
| 1344 | ASV204  | 0 | 3B_8  | Planctomycetota   | Schlesneriaceae              | Planctopirus        | NA             |
| 1345 | ASV204  | 0 | 3B_11 | Planctomycetota   | Schlesneriaceae              | Planctopirus        | NA             |
| 1346 | ASV2041 | 0 | 3W_8  | Bacteroidota      | Spirosomaceae                | Runella             | palustris      |
| 1347 | ASV2041 | 0 | 3B_11 | Bacteroidota      | Spirosomaceae                | Runella             | palustris      |
| 1348 | ASV2041 | 0 | 3B_8  | Bacteroidota      | Spirosomaceae                | Runella             | palustris      |
| 1349 | ASV2042 | 0 | 3W_8  | Cyanobacteria     | Microcystaceae               | Cyanothece PCC-7424 | NA             |
| 1350 | ASV2042 | 0 | 3B_11 | Cyanobacteria     | Microcystaceae               | Cyanothece PCC-7424 | NA             |
| 1351 | ASV2042 | 0 | 3B_8  | Cyanobacteria     | Microcystaceae               | Cyanothece PCC-7424 | NA             |
| 1352 | ASV205  | 0 | 3B_8  | Bacteroidota      | Weeksellaceae                | Cloacibacterium     | NA             |
| 1353 | ASV205  | 0 | 3B_11 | Bacteroidota      | Weeksellaceae                | Cloacibacterium     | NA             |
| 1354 | ASV206  | 0 | 3W_8  | Verrucomicrobiota | Rubritaleaceae               | Luteolibacter       | gellanilyticus |
| 1355 | ASV206  | 0 | 3B_8  | Verrucomicrobiota | Rubritaleaceae               | Luteolibacter       | gellanilyticus |
| 1356 | ASV206  | 0 | 3B_11 | Verrucomicrobiota | Rubritaleaceae               | Luteolibacter       | gellanilyticus |
| 1357 | ASV2061 | 0 | 3B_11 | Firmicutes        | Staphylococcaceae            | Aliococcus          | NA             |
| 1358 | ASV2061 | 0 | 3W_11 | Firmicutes        | Staphylococcaceae            | Aliococcus          | NA             |
| 1359 | ASV2061 | 0 | 3B_8  | Firmicutes        | Staphylococcaceae            | Aliococcus          | NA             |
| 1360 | ASV2065 | 0 | 3W_8  | Cyanobacteria     | Nostocaceae                  | Nostoc PCC-73102    | calcicola      |
| 1361 | ASV2065 | 0 | 3W_11 | Cyanobacteria     | Nostocaceae                  | Nostoc PCC-73102    | calcicola      |
| 1362 | ASV2065 | 0 | 3B_8  | Cyanobacteria     | Nostocaceae                  | Nostoc PCC-73102    | calcicola      |
| 1363 | ASV2066 | 0 | 3B_8  | Proteobacteria    | Enterobacteriaceae           | Klebsiella          | NA             |
| 1364 | ASV2066 | 0 | 3W_11 | Proteobacteria    | Enterobacteriaceae           | Klebsiella          | NA             |
| 1365 | ASV2066 | 0 | 3W_8  | Proteobacteria    | Enterobacteriaceae           | Klebsiella          | NA             |
| 1366 | ASV2067 | 0 | 3W_8  | Bacteroidota      | Prevotellaceae               | Alloprevotella      | NA             |
| 1367 | ASV2067 | 0 | 3B_8  | Bacteroidota      | Prevotellaceae               | Alloprevotella      | NA             |
| 1368 | ASV2067 | 0 | 3W_11 | Bacteroidota      | Prevotellaceae               | Alloprevotella      | NA             |
| 1369 | ASV207  | 0 | 3B_8  | Proteobacteria    | Unknown Family               | Acidibacter         | NA             |
| 1370 | ASV207  | 0 | 3W_8  | Proteobacteria    | Unknown Family               | Acidibacter         | NA             |

|      |         |   |       |                  |                           |                      |               |
|------|---------|---|-------|------------------|---------------------------|----------------------|---------------|
| 1371 | ASV207  | 0 | 3B_11 | Proteobacteria   | Unknown Family            | Acidibacter          | NA            |
| 1372 | ASV2073 | 0 | 3B_11 | Campylobacterota | Campylobacteraceae        | Campylobacter        | ureolyticus   |
| 1373 | ASV2073 | 0 | 3W_8  | Campylobacterota | Campylobacteraceae        | Campylobacter        | ureolyticus   |
| 1374 | ASV2073 | 0 | 3W_11 | Campylobacterota | Campylobacteraceae        | Campylobacter        | ureolyticus   |
| 1375 | ASV2087 | 0 | 3B_11 | Firmicutes       | Family XI                 | Anaerococcus         | octavius      |
| 1376 | ASV2087 | 0 | 3W_8  | Firmicutes       | Family XI                 | Anaerococcus         | octavius      |
| 1377 | ASV2087 | 0 | 3B_8  | Firmicutes       | Family XI                 | Anaerococcus         | octavius      |
| 1378 | ASV2088 | 0 | 3W_8  | Proteobacteria   | Diplorickettsiaceae       | Aquicella            | NA            |
| 1379 | ASV2088 | 0 | 3B_11 | Proteobacteria   | Diplorickettsiaceae       | Aquicella            | NA            |
| 1380 | ASV2088 | 0 | 3B_8  | Proteobacteria   | Diplorickettsiaceae       | Aquicella            | NA            |
| 1381 | ASV209  | 0 | 3B_8  | Bdellovibrionota | Oligoflexaceae            | Oligoflexus          | NA            |
| 1382 | ASV209  | 0 | 3B_11 | Bdellovibrionota | Oligoflexaceae            | Oligoflexus          | NA            |
| 1383 | ASV209  | 0 | 3W_8  | Bdellovibrionota | Oligoflexaceae            | Oligoflexus          | NA            |
| 1384 | ASV2091 | 0 | 3W_8  | Chloroflexi      | Chloroflexaceae           | Chloronema           | NA            |
| 1385 | ASV2091 | 0 | 3B_11 | Chloroflexi      | Chloroflexaceae           | Chloronema           | NA            |
| 1386 | ASV2091 | 0 | 3B_8  | Chloroflexi      | Chloroflexaceae           | Chloronema           | NA            |
| 1387 | ASV2095 | 0 | 3W_11 | Firmicutes       | Caldicellulosiraptoraceae | Caldicellulosiruptor | NA            |
| 1388 | ASV2095 | 0 | 3B_11 | Firmicutes       | Caldicellulosiraptoraceae | Caldicellulosiruptor | NA            |
| 1389 | ASV2095 | 0 | 3B_8  | Firmicutes       | Caldicellulosiraptoraceae | Caldicellulosiruptor | NA            |
| 1390 | ASV21   | 0 | 3B_11 | Proteobacteria   | Burkholderiaceae          | Limnobacter          | thiooxidans   |
| 1391 | ASV21   | 0 | 3W_8  | Proteobacteria   | Burkholderiaceae          | Limnobacter          | thiooxidans   |
| 1392 | ASV21   | 0 | 3B_8  | Proteobacteria   | Burkholderiaceae          | Limnobacter          | thiooxidans   |
| 1393 | ASV210  | 0 | 3B_8  | Actinobacteriota | Nocardioideaceae          | Aeromicrobium        | NA            |
| 1394 | ASV210  | 0 | 3B_11 | Actinobacteriota | Nocardioideaceae          | Aeromicrobium        | NA            |
| 1395 | ASV210  | 0 | 3W_8  | Actinobacteriota | Nocardioideaceae          | Aeromicrobium        | NA            |
| 1396 | ASV212  | 0 | 3B_8  | Proteobacteria   | Halomonadaceae            | Halomonas            | NA            |
| 1397 | ASV213  | 0 | 3B_8  | Proteobacteria   | Oxalobacteraceae          | Noviherbaspirillum   | suwonense     |
| 1398 | ASV213  | 0 | 3B_11 | Proteobacteria   | Oxalobacteraceae          | Noviherbaspirillum   | suwonense     |
| 1399 | ASV213  | 0 | 3W_8  | Proteobacteria   | Oxalobacteraceae          | Noviherbaspirillum   | suwonense     |
| 1400 | ASV215  | 0 | 3W_11 | Proteobacteria   | Gallionellaceae           | Sideroxydans         | NA            |
| 1401 | ASV215  | 0 | 3B_11 | Proteobacteria   | Gallionellaceae           | Sideroxydans         | NA            |
| 1402 | ASV215  | 0 | 3B_8  | Proteobacteria   | Gallionellaceae           | Sideroxydans         | NA            |
| 1403 | ASV217  | 0 | 3W_8  | Proteobacteria   | Sphingomonadaceae         | Sphingomonas         | jaspsi        |
| 1404 | ASV217  | 0 | 3B_11 | Proteobacteria   | Sphingomonadaceae         | Sphingomonas         | jaspsi        |
| 1405 | ASV217  | 0 | 3B_8  | Proteobacteria   | Sphingomonadaceae         | Sphingomonas         | jaspsi        |
| 1406 | ASV223  | 0 | 3B_8  | Proteobacteria   | Rhodanobacteraceae        | Tahibacter           | aquaticus     |
| 1407 | ASV223  | 0 | 3W_8  | Proteobacteria   | Rhodanobacteraceae        | Tahibacter           | aquaticus     |
| 1408 | ASV223  | 0 | 3B_11 | Proteobacteria   | Rhodanobacteraceae        | Tahibacter           | aquaticus     |
| 1409 | ASV231  | 0 | 3W_8  | Proteobacteria   | Sphingomonadaceae         | Sphingopyxis         | witflariensis |
| 1410 | ASV231  | 0 | 3B_8  | Proteobacteria   | Sphingomonadaceae         | Sphingopyxis         | witflariensis |
| 1411 | ASV231  | 0 | 3B_11 | Proteobacteria   | Sphingomonadaceae         | Sphingopyxis         | witflariensis |
| 1412 | ASV234  | 0 | 3B_8  | Firmicutes       | Bacillaceae               | Ornithinibacillus    | NA            |
| 1413 | ASV238  | 0 | 3B_8  | Bacteroidota     | Chitinophagaceae          | Ferruginibacter      | NA            |
| 1414 | ASV238  | 0 | 3W_8  | Bacteroidota     | Chitinophagaceae          | Ferruginibacter      | NA            |
| 1415 | ASV238  | 0 | 3B_11 | Bacteroidota     | Chitinophagaceae          | Ferruginibacter      | NA            |
| 1416 | ASV239  | 0 | 3B_8  | Actinobacteriota | Bogoriellaceae            | Georgenia            | NA            |
| 1417 | ASV239  | 0 | 3B_11 | Actinobacteriota | Bogoriellaceae            | Georgenia            | NA            |
| 1418 | ASV242  | 0 | 3B_8  | Bacteroidota     | Microscillaceae           | Chryseolinea         | NA            |
| 1419 | ASV242  | 0 | 3W_8  | Bacteroidota     | Microscillaceae           | Chryseolinea         | NA            |

|      |        |  |         |                  |                        |                         |              |
|------|--------|--|---------|------------------|------------------------|-------------------------|--------------|
| 1420 | ASV242 |  | 0 3B_11 | Bacteroidota     | Microscillaceae        | Chryseolinea            | NA           |
| 1421 | ASV246 |  | 0 3W_8  | Proteobacteria   | Rhodobacteraceae       | Gemmobacter             | NA           |
| 1422 | ASV246 |  | 0 3B_8  | Proteobacteria   | Rhodobacteraceae       | Gemmobacter             | NA           |
| 1423 | ASV246 |  | 0 3B_11 | Proteobacteria   | Rhodobacteraceae       | Gemmobacter             | NA           |
| 1424 | ASV249 |  | 0 3W_8  | Proteobacteria   | Alteromonadaceae       | Rheinheimera            | NA           |
| 1425 | ASV249 |  | 0 3B_11 | Proteobacteria   | Alteromonadaceae       | Rheinheimera            | NA           |
| 1426 | ASV249 |  | 0 3B_8  | Proteobacteria   | Alteromonadaceae       | Rheinheimera            | NA           |
| 1427 | ASV25  |  | 0 3W_8  | Proteobacteria   | Solimonadaceae         | Solimonas               | NA           |
| 1428 | ASV25  |  | 0 3B_8  | Proteobacteria   | Solimonadaceae         | Solimonas               | NA           |
| 1429 | ASV25  |  | 0 3B_11 | Proteobacteria   | Solimonadaceae         | Solimonas               | NA           |
| 1430 | ASV252 |  | 0 3W_11 | Firmicutes       | Thermoactinomycetaceae | Novibacillus            | thermophilus |
| 1431 | ASV252 |  | 0 3B_8  | Firmicutes       | Thermoactinomycetaceae | Novibacillus            | thermophilus |
| 1432 | ASV252 |  | 0 3B_11 | Firmicutes       | Thermoactinomycetaceae | Novibacillus            | thermophilus |
| 1433 | ASV254 |  | 0 3B_8  | Bacteroidota     | Sphingobacteriaceae    | Pedobacter              | luteus       |
| 1434 | ASV254 |  | 0 3B_11 | Bacteroidota     | Sphingobacteriaceae    | Pedobacter              | luteus       |
| 1435 | ASV254 |  | 0 3W_8  | Bacteroidota     | Sphingobacteriaceae    | Pedobacter              | luteus       |
| 1436 | ASV255 |  | 0 3W_8  | Proteobacteria   | Rhodanobacteraceae     | Ahniella                | NA           |
| 1437 | ASV255 |  | 0 3B_11 | Proteobacteria   | Rhodanobacteraceae     | Ahniella                | NA           |
| 1438 | ASV255 |  | 0 3B_8  | Proteobacteria   | Rhodanobacteraceae     | Ahniella                | NA           |
| 1439 | ASV257 |  | 0 3B_11 | Proteobacteria   | Unknown Family         | Candidatus Ovatusbacter | NA           |
| 1440 | ASV257 |  | 0 3B_8  | Proteobacteria   | Unknown Family         | Candidatus Ovatusbacter | NA           |
| 1441 | ASV259 |  | 0 3W_8  | Actinobacteriota | Pseudonocardiaceae     | Actinomycetospora       | iriomotensis |
| 1442 | ASV259 |  | 0 3B_8  | Actinobacteriota | Pseudonocardiaceae     | Actinomycetospora       | iriomotensis |
| 1443 | ASV259 |  | 0 3B_11 | Actinobacteriota | Pseudonocardiaceae     | Actinomycetospora       | iriomotensis |
| 1444 | ASV26  |  | 0 3B_8  | Proteobacteria   | Devosiaceae            | Devosia                 | NA           |
| 1445 | ASV26  |  | 0 3B_11 | Proteobacteria   | Devosiaceae            | Devosia                 | NA           |
| 1446 | ASV265 |  | 0 3B_8  | Proteobacteria   | Xanthomonadaceae       | Pseudoxanthomonas       | NA           |
| 1447 | ASV265 |  | 0 3B_11 | Proteobacteria   | Xanthomonadaceae       | Pseudoxanthomonas       | NA           |
| 1448 | ASV266 |  | 0 3W_8  | Proteobacteria   | Unknown Family         | Candidatus Berkiella    | NA           |
| 1449 | ASV266 |  | 0 3B_11 | Proteobacteria   | Unknown Family         | Candidatus Berkiella    | NA           |
| 1450 | ASV266 |  | 0 3B_8  | Proteobacteria   | Unknown Family         | Candidatus Berkiella    | NA           |
| 1451 | ASV268 |  | 0 3W_8  | Proteobacteria   | Moraxellaceae          | Acinetobacter           | lwoffii      |
| 1452 | ASV268 |  | 0 3B_8  | Proteobacteria   | Moraxellaceae          | Acinetobacter           | lwoffii      |
| 1453 | ASV270 |  | 0 3B_11 | Actinobacteriota | Pseudonocardiaceae     | Actinomycetospora       | NA           |
| 1454 | ASV270 |  | 0 3W_8  | Actinobacteriota | Pseudonocardiaceae     | Actinomycetospora       | NA           |
| 1455 | ASV270 |  | 0 3B_8  | Actinobacteriota | Pseudonocardiaceae     | Actinomycetospora       | NA           |
| 1456 | ASV272 |  | 0 3B_11 | Actinobacteriota | Intrasporangiaceae     | Ornithinibacter         | aureus       |
| 1457 | ASV272 |  | 0 3B_8  | Actinobacteriota | Intrasporangiaceae     | Ornithinibacter         | aureus       |
| 1458 | ASV272 |  | 0 3W_8  | Actinobacteriota | Intrasporangiaceae     | Ornithinibacter         | aureus       |
| 1459 | ASV275 |  | 0 3B_8  | Proteobacteria   | Moraxellaceae          | Psychrobacter           | NA           |
| 1460 | ASV275 |  | 0 3W_8  | Proteobacteria   | Moraxellaceae          | Psychrobacter           | NA           |
| 1461 | ASV277 |  | 0 3W_8  | Proteobacteria   | Rickettsiaceae         | Rickettsia              | NA           |
| 1462 | ASV277 |  | 0 3B_8  | Proteobacteria   | Rickettsiaceae         | Rickettsia              | NA           |
| 1463 | ASV277 |  | 0 3B_11 | Proteobacteria   | Rickettsiaceae         | Rickettsia              | NA           |
| 1464 | ASV278 |  | 0 3W_8  | Proteobacteria   | Rhodomicrobiaceae      | Rhodomicrobium          | NA           |
| 1465 | ASV278 |  | 0 3B_11 | Proteobacteria   | Rhodomicrobiaceae      | Rhodomicrobium          | NA           |
| 1466 | ASV278 |  | 0 3B_8  | Proteobacteria   | Rhodomicrobiaceae      | Rhodomicrobium          | NA           |
| 1467 | ASV28  |  | 0 3B_8  | Bacteroidota     | Weeksellaceae          | Chryseobacterium        | NA           |
| 1468 | ASV28  |  | 0 3W_8  | Bacteroidota     | Weeksellaceae          | Chryseobacterium        | NA           |

|      |        |   |       |                   |                     |                    |                  |
|------|--------|---|-------|-------------------|---------------------|--------------------|------------------|
| 1469 | ASV281 | 0 | 3B_8  | Bacteroidota      | Sphingobacteriaceae | Arcticibacter      | NA               |
| 1470 | ASV281 | 0 | 3B_11 | Bacteroidota      | Sphingobacteriaceae | Arcticibacter      | NA               |
| 1471 | ASV281 | 0 | 3W_11 | Bacteroidota      | Sphingobacteriaceae | Arcticibacter      | NA               |
| 1472 | ASV284 | 0 | 3B_11 | Proteobacteria    | Oxalobacteraceae    | Hermiimonas        | NA               |
| 1473 | ASV284 | 0 | 3W_8  | Proteobacteria    | Oxalobacteraceae    | Hermiimonas        | NA               |
| 1474 | ASV284 | 0 | 3B_8  | Proteobacteria    | Oxalobacteraceae    | Hermiimonas        | NA               |
| 1475 | ASV287 | 0 | 3B_8  | Bacteroidota      | Flavobacteriaceae   | Flavobacterium     | terrigena        |
| 1476 | ASV287 | 0 | 3B_11 | Bacteroidota      | Flavobacteriaceae   | Flavobacterium     | terrigena        |
| 1477 | ASV287 | 0 | 3W_8  | Bacteroidota      | Flavobacteriaceae   | Flavobacterium     | terrigena        |
| 1478 | ASV289 | 0 | 3B_8  | Proteobacteria    | Comamonadaceae      | Polaromonas        | NA               |
| 1479 | ASV289 | 0 | 3B_11 | Proteobacteria    | Comamonadaceae      | Polaromonas        | NA               |
| 1480 | ASV289 | 0 | 3W_8  | Proteobacteria    | Comamonadaceae      | Polaromonas        | NA               |
| 1481 | ASV292 | 0 | 3B_11 | Bacteroidota      | Spirosomaceae       | Persicitalea       | NA               |
| 1482 | ASV292 | 0 | 3B_8  | Bacteroidota      | Spirosomaceae       | Persicitalea       | NA               |
| 1483 | ASV292 | 0 | 3W_8  | Bacteroidota      | Spirosomaceae       | Persicitalea       | NA               |
| 1484 | ASV293 | 0 | 3B_8  | Proteobacteria    | Sphingomonadaceae   | Altererythrobacter | NA               |
| 1485 | ASV293 | 0 | 3B_11 | Proteobacteria    | Sphingomonadaceae   | Altererythrobacter | NA               |
| 1486 | ASV296 | 0 | 3W_8  | Bacteroidota      | Sphingobacteriaceae | Pedobacter         | insulae          |
| 1487 | ASV296 | 0 | 3B_8  | Bacteroidota      | Sphingobacteriaceae | Pedobacter         | insulae          |
| 1488 | ASV296 | 0 | 3B_11 | Bacteroidota      | Sphingobacteriaceae | Pedobacter         | insulae          |
| 1489 | ASV300 | 0 | 3W_8  | Proteobacteria    | Xanthobacteraceae   | Rhodopseudomonas   | NA               |
| 1490 | ASV301 | 0 | 3W_8  | Proteobacteria    | Comamonadaceae      | Leptothrix         | NA               |
| 1491 | ASV301 | 0 | 3B_11 | Proteobacteria    | Comamonadaceae      | Leptothrix         | NA               |
| 1492 | ASV301 | 0 | 3B_8  | Proteobacteria    | Comamonadaceae      | Leptothrix         | NA               |
| 1493 | ASV312 | 0 | 3B_11 | Proteobacteria    | Comamonadaceae      | Aquabacterium      | NA               |
| 1494 | ASV312 | 0 | 3B_8  | Proteobacteria    | Comamonadaceae      | Aquabacterium      | NA               |
| 1495 | ASV313 | 0 | 3W_8  | Proteobacteria    | Acetobacteraceae    | Roseomonas         | NA               |
| 1496 | ASV313 | 0 | 3B_11 | Proteobacteria    | Acetobacteraceae    | Roseomonas         | NA               |
| 1497 | ASV313 | 0 | 3B_8  | Proteobacteria    | Acetobacteraceae    | Roseomonas         | NA               |
| 1498 | ASV316 | 0 | 3W_8  | Bacteroidota      | Sphingobacteriaceae | Pedobacter         | heparinus        |
| 1499 | ASV316 | 0 | 3B_11 | Bacteroidota      | Sphingobacteriaceae | Pedobacter         | heparinus        |
| 1500 | ASV316 | 0 | 3B_8  | Bacteroidota      | Sphingobacteriaceae | Pedobacter         | heparinus        |
| 1501 | ASV317 | 0 | 3W_8  | Acidobacteriota   | Blastocatellaceae   | JGI 0001001-H03    | NA               |
| 1502 | ASV317 | 0 | 3B_11 | Acidobacteriota   | Blastocatellaceae   | JGI 0001001-H03    | NA               |
| 1503 | ASV317 | 0 | 3B_8  | Acidobacteriota   | Blastocatellaceae   | JGI 0001001-H03    | NA               |
| 1504 | ASV318 | 0 | 3B_11 | Actinobacteriota  | Nocardioidaceae     | Nocardioides       | NA               |
| 1505 | ASV318 | 0 | 3B_8  | Actinobacteriota  | Nocardioidaceae     | Nocardioides       | NA               |
| 1506 | ASV318 | 0 | 3W_8  | Actinobacteriota  | Nocardioidaceae     | Nocardioides       | NA               |
| 1507 | ASV319 | 0 | 3B_11 | Proteobacteria    | Comamonadaceae      | Ramlibacter        | NA               |
| 1508 | ASV319 | 0 | 3W_8  | Proteobacteria    | Comamonadaceae      | Ramlibacter        | NA               |
| 1509 | ASV319 | 0 | 3B_8  | Proteobacteria    | Comamonadaceae      | Ramlibacter        | NA               |
| 1510 | ASV32  | 0 | 3B_8  | Proteobacteria    | Comamonadaceae      | Inhella            | NA               |
| 1511 | ASV32  | 0 | 3B_11 | Proteobacteria    | Comamonadaceae      | Inhella            | NA               |
| 1512 | ASV32  | 0 | 3W_8  | Proteobacteria    | Comamonadaceae      | Inhella            | NA               |
| 1513 | ASV321 | 0 | 3B_11 | Actinobacteriota  | Micromonosporaceae  | Virgisporangium    | aliadipatigenens |
| 1514 | ASV321 | 0 | 3W_8  | Actinobacteriota  | Micromonosporaceae  | Virgisporangium    | aliadipatigenens |
| 1515 | ASV321 | 0 | 3B_8  | Actinobacteriota  | Micromonosporaceae  | Virgisporangium    | aliadipatigenens |
| 1516 | ASV322 | 0 | 3B_11 | Verrucomicrobiota | Opitutaceae         | Lacunisphaera      | NA               |
| 1517 | ASV322 | 0 | 3W_8  | Verrucomicrobiota | Opitutaceae         | Lacunisphaera      | NA               |

|      |        |   |       |                   |                     |                  |             |
|------|--------|---|-------|-------------------|---------------------|------------------|-------------|
| 1518 | ASV322 | 0 | 3B_8  | Verrucomicrobiota | Opitutaceae         | Lacunisphaera    | NA          |
| 1519 | ASV325 | 0 | 3B_8  | Firmicutes        | Streptococcaceae    | Streptococcus    | NA          |
| 1520 | ASV330 | 0 | 3W_8  | Acidobacteriota   | Bryobacteraceae     | Bryobacter       | NA          |
| 1521 | ASV330 | 0 | 3B_11 | Acidobacteriota   | Bryobacteraceae     | Bryobacter       | NA          |
| 1522 | ASV330 | 0 | 3B_8  | Acidobacteriota   | Bryobacteraceae     | Bryobacter       | NA          |
| 1523 | ASV333 | 0 | 3B_11 | Proteobacteria    | Oxalobacteraceae    | Undibacterium    | NA          |
| 1524 | ASV333 | 0 | 3B_8  | Proteobacteria    | Oxalobacteraceae    | Undibacterium    | NA          |
| 1525 | ASV336 | 0 | 3W_8  | Actinobacteriota  | Cryptosporangiaceae | Cryptosporangium | NA          |
| 1526 | ASV336 | 0 | 3B_8  | Actinobacteriota  | Cryptosporangiaceae | Cryptosporangium | NA          |
| 1527 | ASV336 | 0 | 3B_11 | Actinobacteriota  | Cryptosporangiaceae | Cryptosporangium | NA          |
| 1528 | ASV338 | 0 | 3B_8  | Proteobacteria    | Beijerinckiaceae    | Camelimonas      | NA          |
| 1529 | ASV338 | 0 | 3W_8  | Proteobacteria    | Beijerinckiaceae    | Camelimonas      | NA          |
| 1530 | ASV338 | 0 | 3B_11 | Proteobacteria    | Beijerinckiaceae    | Camelimonas      | NA          |
| 1531 | ASV34  | 0 | 3W_8  | Proteobacteria    | Acetobacteraceae    | Roseococcus      | NA          |
| 1532 | ASV341 | 0 | 3B_11 | Bdellovibrionota  | Bdellovibrionaceae  | Bdellovibrio     | NA          |
| 1533 | ASV341 | 0 | 3W_8  | Bdellovibrionota  | Bdellovibrionaceae  | Bdellovibrio     | NA          |
| 1534 | ASV342 | 0 | 3B_8  | Proteobacteria    | Spongiibacteraceae  | BD1-7 clade      | NA          |
| 1535 | ASV342 | 0 | 3B_11 | Proteobacteria    | Spongiibacteraceae  | BD1-7 clade      | NA          |
| 1536 | ASV342 | 0 | 3W_8  | Proteobacteria    | Spongiibacteraceae  | BD1-7 clade      | NA          |
| 1537 | ASV345 | 0 | 3B_8  | Proteobacteria    | Enterobacteriaceae  | Citrobacter      | NA          |
| 1538 | ASV345 | 0 | 3B_11 | Proteobacteria    | Enterobacteriaceae  | Citrobacter      | NA          |
| 1539 | ASV345 | 0 | 3W_11 | Proteobacteria    | Enterobacteriaceae  | Citrobacter      | NA          |
| 1540 | ASV349 | 0 | 3B_8  | Proteobacteria    | Xanthomonadaceae    | Lysobacter       | spongiicola |
| 1541 | ASV349 | 0 | 3W_8  | Proteobacteria    | Xanthomonadaceae    | Lysobacter       | spongiicola |
| 1542 | ASV349 | 0 | 3B_11 | Proteobacteria    | Xanthomonadaceae    | Lysobacter       | spongiicola |
| 1543 | ASV350 | 0 | 3B_8  | Planctomycetota   | Pirellulaceae       | Pirellula        | NA          |
| 1544 | ASV350 | 0 | 3B_11 | Planctomycetota   | Pirellulaceae       | Pirellula        | NA          |
| 1545 | ASV350 | 0 | 3W_8  | Planctomycetota   | Pirellulaceae       | Pirellula        | NA          |
| 1546 | ASV351 | 0 | 3W_8  | Proteobacteria    | Comamonadaceae      | Paucibacter      | NA          |
| 1547 | ASV351 | 0 | 3B_11 | Proteobacteria    | Comamonadaceae      | Paucibacter      | NA          |
| 1548 | ASV351 | 0 | 3B_8  | Proteobacteria    | Comamonadaceae      | Paucibacter      | NA          |
| 1549 | ASV357 | 0 | 3W_8  | Acidobacteriota   | Blastocatellaceae   | Aridibacter      | NA          |
| 1550 | ASV357 | 0 | 3B_8  | Acidobacteriota   | Blastocatellaceae   | Aridibacter      | NA          |
| 1551 | ASV357 | 0 | 3B_11 | Acidobacteriota   | Blastocatellaceae   | Aridibacter      | NA          |
| 1552 | ASV358 | 0 | 3W_8  | Proteobacteria    | Xanthomonadaceae    | Luteimonas       | NA          |
| 1553 | ASV358 | 0 | 3B_11 | Proteobacteria    | Xanthomonadaceae    | Luteimonas       | NA          |
| 1554 | ASV358 | 0 | 3B_8  | Proteobacteria    | Xanthomonadaceae    | Luteimonas       | NA          |
| 1555 | ASV36  | 0 | 3W_8  | Proteobacteria    | Sphingomonadaceae   | Novosphingobium  | NA          |
| 1556 | ASV360 | 0 | 3B_8  | Proteobacteria    | Comamonadaceae      | Hydrogenophaga   | palleronii  |
| 1557 | ASV360 | 0 | 3B_11 | Proteobacteria    | Comamonadaceae      | Hydrogenophaga   | palleronii  |
| 1558 | ASV360 | 0 | 3W_8  | Proteobacteria    | Comamonadaceae      | Hydrogenophaga   | palleronii  |
| 1559 | ASV361 | 0 | 3B_8  | Actinobacteriota  | Corynebacteriaceae  | Corynebacterium  | suicordis   |
| 1560 | ASV361 | 0 | 3W_8  | Actinobacteriota  | Corynebacteriaceae  | Corynebacterium  | suicordis   |
| 1561 | ASV363 | 0 | 3B_8  | Proteobacteria    | Nitrosomonadaceae   | Ellin6067        | NA          |
| 1562 | ASV363 | 0 | 3B_11 | Proteobacteria    | Nitrosomonadaceae   | Ellin6067        | NA          |
| 1563 | ASV365 | 0 | 3W_8  | Actinobacteriota  | Micrococcaceae      | Paenarthrobacter | NA          |
| 1564 | ASV365 | 0 | 3B_8  | Actinobacteriota  | Micrococcaceae      | Paenarthrobacter | NA          |
| 1565 | ASV367 | 0 | 3W_8  | Proteobacteria    | Reyranellaceae      | Reyranella       | aquatilis   |
| 1566 | ASV367 | 0 | 3B_11 | Proteobacteria    | Reyranellaceae      | Reyranella       | aquatilis   |

|      |        |  |         |                  |                    |                   |             |
|------|--------|--|---------|------------------|--------------------|-------------------|-------------|
| 1567 | ASV367 |  | 0 3B_8  | Proteobacteria   | Reyraneliaceae     | Reyranela         | aquatilis   |
| 1568 | ASV371 |  | 0 3W_8  | Proteobacteria   | Caulobacteraceae   | Asticcacaulis     | excentricus |
| 1569 | ASV371 |  | 0 3B_8  | Proteobacteria   | Caulobacteraceae   | Asticcacaulis     | excentricus |
| 1570 | ASV371 |  | 0 3B_11 | Proteobacteria   | Caulobacteraceae   | Asticcacaulis     | excentricus |
| 1571 | ASV372 |  | 0 3B_11 | Bacteroidota     | Crocinitomicaceae  | Salinirepens      | NA          |
| 1572 | ASV372 |  | 0 3B_8  | Bacteroidota     | Crocinitomicaceae  | Salinirepens      | NA          |
| 1573 | ASV372 |  | 0 3W_8  | Bacteroidota     | Crocinitomicaceae  | Salinirepens      | NA          |
| 1574 | ASV378 |  | 0 3B_8  | Proteobacteria   | Rhizobiaceae       | Mesorhizobium     | NA          |
| 1575 | ASV378 |  | 0 3W_8  | Proteobacteria   | Rhizobiaceae       | Mesorhizobium     | NA          |
| 1576 | ASV378 |  | 0 3B_11 | Proteobacteria   | Rhizobiaceae       | Mesorhizobium     | NA          |
| 1577 | ASV379 |  | 0 3B_8  | Firmicutes       | Planococcaceae     | Solibacillus      | NA          |
| 1578 | ASV38  |  | 0 3B_11 | Actinobacteriota | Nocardoidaceae     | Aeromicrobium     | ponti       |
| 1579 | ASV38  |  | 0 3B_8  | Actinobacteriota | Nocardoidaceae     | Aeromicrobium     | ponti       |
| 1580 | ASV38  |  | 0 3W_8  | Actinobacteriota | Nocardoidaceae     | Aeromicrobium     | ponti       |
| 1581 | ASV380 |  | 0 3W_8  | Bacteroidota     | Flavobacteriaceae  | Flavobacterium    | buctense    |
| 1582 | ASV380 |  | 0 3B_8  | Bacteroidota     | Flavobacteriaceae  | Flavobacterium    | buctense    |
| 1583 | ASV380 |  | 0 3B_11 | Bacteroidota     | Flavobacteriaceae  | Flavobacterium    | buctense    |
| 1584 | ASV381 |  | 0 3W_8  | Proteobacteria   | Comamonadaceae     | Pseudorhodiferax  | NA          |
| 1585 | ASV381 |  | 0 3B_8  | Proteobacteria   | Comamonadaceae     | Pseudorhodiferax  | NA          |
| 1586 | ASV381 |  | 0 3B_11 | Proteobacteria   | Comamonadaceae     | Pseudorhodiferax  | NA          |
| 1587 | ASV383 |  | 0 3W_8  | Proteobacteria   | Alcaligenaceae     | Achromobacter     | NA          |
| 1588 | ASV383 |  | 0 3B_11 | Proteobacteria   | Alcaligenaceae     | Achromobacter     | NA          |
| 1589 | ASV383 |  | 0 3B_8  | Proteobacteria   | Alcaligenaceae     | Achromobacter     | NA          |
| 1590 | ASV384 |  | 0 3W_8  | Proteobacteria   | Sutterellaceae     | AAP99             | NA          |
| 1591 | ASV384 |  | 0 3B_11 | Proteobacteria   | Sutterellaceae     | AAP99             | NA          |
| 1592 | ASV384 |  | 0 3B_8  | Proteobacteria   | Sutterellaceae     | AAP99             | NA          |
| 1593 | ASV386 |  | 0 3B_11 | Proteobacteria   | Solimonadaceae     | Nevskia           | ramosa      |
| 1594 | ASV386 |  | 0 3B_8  | Proteobacteria   | Solimonadaceae     | Nevskia           | ramosa      |
| 1595 | ASV386 |  | 0 3W_8  | Proteobacteria   | Solimonadaceae     | Nevskia           | ramosa      |
| 1596 | ASV387 |  | 0 3B_11 | Proteobacteria   | Alcanivoracaceae1  | Alcanivorax       | NA          |
| 1597 | ASV387 |  | 0 3B_8  | Proteobacteria   | Alcanivoracaceae1  | Alcanivorax       | NA          |
| 1598 | ASV387 |  | 0 3W_11 | Proteobacteria   | Alcanivoracaceae1  | Alcanivorax       | NA          |
| 1599 | ASV388 |  | 0 3W_8  | Proteobacteria   | Comamonadaceae     | Piscinibacter     | NA          |
| 1600 | ASV388 |  | 0 3B_11 | Proteobacteria   | Comamonadaceae     | Piscinibacter     | NA          |
| 1601 | ASV390 |  | 0 3W_8  | Proteobacteria   | Rhodanobacteraceae | Dokdonella        | NA          |
| 1602 | ASV390 |  | 0 3B_11 | Proteobacteria   | Rhodanobacteraceae | Dokdonella        | NA          |
| 1603 | ASV390 |  | 0 3B_8  | Proteobacteria   | Rhodanobacteraceae | Dokdonella        | NA          |
| 1604 | ASV40  |  | 0 3W_8  | Proteobacteria   | Moraxellaceae      | Paraperlucidibaca | NA          |
| 1605 | ASV40  |  | 0 3B_8  | Proteobacteria   | Moraxellaceae      | Paraperlucidibaca | NA          |
| 1606 | ASV40  |  | 0 3B_11 | Proteobacteria   | Moraxellaceae      | Paraperlucidibaca | NA          |
| 1607 | ASV402 |  | 0 3W_8  | Proteobacteria   | Methylophilaceae   | Methylotenera     | versatilis  |
| 1608 | ASV402 |  | 0 3B_11 | Proteobacteria   | Methylophilaceae   | Methylotenera     | versatilis  |
| 1609 | ASV402 |  | 0 3B_8  | Proteobacteria   | Methylophilaceae   | Methylotenera     | versatilis  |
| 1610 | ASV403 |  | 0 3W_8  | Firmicutes       | Planococcaceae     | Sporosarcina      | NA          |
| 1611 | ASV403 |  | 0 3B_8  | Firmicutes       | Planococcaceae     | Sporosarcina      | NA          |
| 1612 | ASV403 |  | 0 3B_11 | Firmicutes       | Planococcaceae     | Sporosarcina      | NA          |
| 1613 | ASV408 |  | 0 3B_11 | Proteobacteria   | Burkholderiaceae   | Cupriavidus       | NA          |
| 1614 | ASV408 |  | 0 3W_8  | Proteobacteria   | Burkholderiaceae   | Cupriavidus       | NA          |
| 1615 | ASV408 |  | 0 3B_8  | Proteobacteria   | Burkholderiaceae   | Cupriavidus       | NA          |

|      |        |   |       |                   |                       |                    |             |
|------|--------|---|-------|-------------------|-----------------------|--------------------|-------------|
| 1616 | ASV409 | 0 | 3B_11 | Planctomycetota   | Gemmataceae           | Gemmata            | NA          |
| 1617 | ASV409 | 0 | 3W_8  | Planctomycetota   | Gemmataceae           | Gemmata            | NA          |
| 1618 | ASV409 | 0 | 3B_8  | Planctomycetota   | Gemmataceae           | Gemmata            | NA          |
| 1619 | ASV412 | 0 | 3B_11 | Actinobacteriota  | Nocardioideaceae      | Nocardioides       | daedukensis |
| 1620 | ASV412 | 0 | 3W_8  | Actinobacteriota  | Nocardioideaceae      | Nocardioides       | daedukensis |
| 1621 | ASV412 | 0 | 3B_8  | Actinobacteriota  | Nocardioideaceae      | Nocardioides       | daedukensis |
| 1622 | ASV415 | 0 | 3W_8  | Verrucomicrobiota | Rubritaleaceae        | Luteolibacter      | flavescens  |
| 1623 | ASV415 | 0 | 3B_8  | Verrucomicrobiota | Rubritaleaceae        | Luteolibacter      | flavescens  |
| 1624 | ASV415 | 0 | 3B_11 | Verrucomicrobiota | Rubritaleaceae        | Luteolibacter      | flavescens  |
| 1625 | ASV416 | 0 | 3B_11 | Proteobacteria    | Cellvibrionaceae      | Marinagarivorans   | NA          |
| 1626 | ASV416 | 0 | 3W_8  | Proteobacteria    | Cellvibrionaceae      | Marinagarivorans   | NA          |
| 1627 | ASV416 | 0 | 3B_8  | Proteobacteria    | Cellvibrionaceae      | Marinagarivorans   | NA          |
| 1628 | ASV418 | 0 | 3B_8  | Campylobacterota  | Campylobacteraceae    | Campylobacter      | gracilis    |
| 1629 | ASV418 | 0 | 3W_11 | Campylobacterota  | Campylobacteraceae    | Campylobacter      | gracilis    |
| 1630 | ASV418 | 0 | 3B_11 | Campylobacterota  | Campylobacteraceae    | Campylobacter      | gracilis    |
| 1631 | ASV42  | 0 | 3B_11 | Firmicutes        | Enterococcaceae       | Enterococcus       | cecorum     |
| 1632 | ASV42  | 0 | 3B_8  | Firmicutes        | Enterococcaceae       | Enterococcus       | cecorum     |
| 1633 | ASV426 | 0 | 3W_8  | Verrucomicrobiota | Rubritaleaceae        | Luteolibacter      | NA          |
| 1634 | ASV426 | 0 | 3B_11 | Verrucomicrobiota | Rubritaleaceae        | Luteolibacter      | NA          |
| 1635 | ASV426 | 0 | 3B_8  | Verrucomicrobiota | Rubritaleaceae        | Luteolibacter      | NA          |
| 1636 | ASV430 | 0 | 3W_8  | Acidobacteriota   | Blastocatellaceae     | OLB17              | NA          |
| 1637 | ASV430 | 0 | 3B_8  | Acidobacteriota   | Blastocatellaceae     | OLB17              | NA          |
| 1638 | ASV430 | 0 | 3B_11 | Acidobacteriota   | Blastocatellaceae     | OLB17              | NA          |
| 1639 | ASV437 | 0 | 3B_11 | Proteobacteria    | Solimonadaceae        | Hydrocarboniphaga  | effusa      |
| 1640 | ASV437 | 0 | 3W_8  | Proteobacteria    | Solimonadaceae        | Hydrocarboniphaga  | effusa      |
| 1641 | ASV437 | 0 | 3B_8  | Proteobacteria    | Solimonadaceae        | Hydrocarboniphaga  | effusa      |
| 1642 | ASV44  | 0 | 3B_8  | Firmicutes        | Caldalkalibacillaceae | Caldalkalibacillus | thermarum   |
| 1643 | ASV441 | 0 | 3B_8  | Firmicutes        | Bacillaceae           | Bacillus           | NA          |
| 1644 | ASV442 | 0 | 3W_8  | Verrucomicrobiota | Opitutaceae           | IMCC26134          | NA          |
| 1645 | ASV442 | 0 | 3B_11 | Verrucomicrobiota | Opitutaceae           | IMCC26134          | NA          |
| 1646 | ASV442 | 0 | 3B_8  | Verrucomicrobiota | Opitutaceae           | IMCC26134          | NA          |
| 1647 | ASV445 | 0 | 3B_8  | Verrucomicrobiota | Chthoniobacteraceae   | Chthoniobacter     | NA          |
| 1648 | ASV445 | 0 | 3B_11 | Verrucomicrobiota | Chthoniobacteraceae   | Chthoniobacter     | NA          |
| 1649 | ASV447 | 0 | 3B_8  | Firmicutes        | Ruminococcaceae       | Ruminococcus       | bromii      |
| 1650 | ASV447 | 0 | 3W_11 | Firmicutes        | Ruminococcaceae       | Ruminococcus       | bromii      |
| 1651 | ASV447 | 0 | 3B_11 | Firmicutes        | Ruminococcaceae       | Ruminococcus       | bromii      |
| 1652 | ASV448 | 0 | 3W_8  | Proteobacteria    | Nitrosomonadaceae     | mle1-7             | NA          |
| 1653 | ASV448 | 0 | 3B_8  | Proteobacteria    | Nitrosomonadaceae     | mle1-7             | NA          |
| 1654 | ASV448 | 0 | 3B_11 | Proteobacteria    | Nitrosomonadaceae     | mle1-7             | NA          |
| 1655 | ASV45  | 0 | 3B_11 | Proteobacteria    | Sphingomonadaceae     | Sphingomonas       | koreensis   |
| 1656 | ASV45  | 0 | 3B_8  | Proteobacteria    | Sphingomonadaceae     | Sphingomonas       | koreensis   |
| 1657 | ASV454 | 0 | 3W_11 | Proteobacteria    | Alcaligenaceae        | Pigmentiphaga      | NA          |
| 1658 | ASV454 | 0 | 3B_8  | Proteobacteria    | Alcaligenaceae        | Pigmentiphaga      | NA          |
| 1659 | ASV454 | 0 | 3B_11 | Proteobacteria    | Alcaligenaceae        | Pigmentiphaga      | NA          |
| 1660 | ASV457 | 0 | 3B_8  | Deinococcota      | Trueperaceae          | Truepera           | NA          |
| 1661 | ASV457 | 0 | 3B_11 | Deinococcota      | Trueperaceae          | Truepera           | NA          |
| 1662 | ASV457 | 0 | 3W_8  | Deinococcota      | Trueperaceae          | Truepera           | NA          |
| 1663 | ASV458 | 0 | 3B_8  | Bacteroidota      | Rhodothermaceae       | Rubrivirga         | NA          |
| 1664 | ASV458 | 0 | 3B_11 | Bacteroidota      | Rhodothermaceae       | Rubrivirga         | NA          |

|      |        |  |         |                   |                     |                          |             |
|------|--------|--|---------|-------------------|---------------------|--------------------------|-------------|
| 1665 | ASV458 |  | 0 3W_8  | Bacteroidota      | Rhodothermaceae     | Rubrivirga               | NA          |
| 1666 | ASV459 |  | 0 3W_8  | Planctomycetota   | Gemmataceae         | Fimbrigliobus            | NA          |
| 1667 | ASV459 |  | 0 3B_8  | Planctomycetota   | Gemmataceae         | Fimbrigliobus            | NA          |
| 1668 | ASV459 |  | 0 3B_11 | Planctomycetota   | Gemmataceae         | Fimbrigliobus            | NA          |
| 1669 | ASV46  |  | 0 3W_8  | Proteobacteria    | Devosiaceae         | Devosia                  | limi        |
| 1670 | ASV46  |  | 0 3B_11 | Proteobacteria    | Devosiaceae         | Devosia                  | limi        |
| 1671 | ASV46  |  | 0 3B_8  | Proteobacteria    | Devosiaceae         | Devosia                  | limi        |
| 1672 | ASV461 |  | 0 3W_11 | Firmicutes        | Family XI           | Peptoniphilus            | NA          |
| 1673 | ASV461 |  | 0 3B_8  | Firmicutes        | Family XI           | Peptoniphilus            | NA          |
| 1674 | ASV462 |  | 0 3W_8  | Proteobacteria    | Geminicoccaceae     | Candidatus Alysiosphaera | NA          |
| 1675 | ASV462 |  | 0 3B_11 | Proteobacteria    | Geminicoccaceae     | Candidatus Alysiosphaera | NA          |
| 1676 | ASV462 |  | 0 3B_8  | Proteobacteria    | Geminicoccaceae     | Candidatus Alysiosphaera | NA          |
| 1677 | ASV463 |  | 0 3B_8  | Actinobacteriota  | Geodermatophilaceae | Blastococcus             | NA          |
| 1678 | ASV463 |  | 0 3B_11 | Actinobacteriota  | Geodermatophilaceae | Blastococcus             | NA          |
| 1679 | ASV463 |  | 0 3W_8  | Actinobacteriota  | Geodermatophilaceae | Blastococcus             | NA          |
| 1680 | ASV464 |  | 0 3B_8  | Firmicutes        | Lactobacillaceae    | Fructobacillus           | NA          |
| 1681 | ASV464 |  | 0 3B_11 | Firmicutes        | Lactobacillaceae    | Fructobacillus           | NA          |
| 1682 | ASV464 |  | 0 3W_8  | Firmicutes        | Lactobacillaceae    | Fructobacillus           | NA          |
| 1683 | ASV465 |  | 0 3B_11 | Actinobacteriota  | Micromonosporaceae  | Salinispora              | NA          |
| 1684 | ASV465 |  | 0 3W_11 | Actinobacteriota  | Micromonosporaceae  | Salinispora              | NA          |
| 1685 | ASV465 |  | 0 3B_8  | Actinobacteriota  | Micromonosporaceae  | Salinispora              | NA          |
| 1686 | ASV467 |  | 0 3B_8  | Proteobacteria    | Sphingomonadaceae   | Blastomonas              | NA          |
| 1687 | ASV467 |  | 0 3W_8  | Proteobacteria    | Sphingomonadaceae   | Blastomonas              | NA          |
| 1688 | ASV468 |  | 0 3B_8  | Bacteroidota      | Weeksellaceae       | Chryseobacterium         | antarcticum |
| 1689 | ASV468 |  | 0 3W_8  | Bacteroidota      | Weeksellaceae       | Chryseobacterium         | antarcticum |
| 1690 | ASV468 |  | 0 3B_11 | Bacteroidota      | Weeksellaceae       | Chryseobacterium         | antarcticum |
| 1691 | ASV469 |  | 0 3W_8  | Actinobacteriota  | Demequinaceae       | Demequina                | NA          |
| 1692 | ASV469 |  | 0 3B_8  | Actinobacteriota  | Demequinaceae       | Demequina                | NA          |
| 1693 | ASV469 |  | 0 3B_11 | Actinobacteriota  | Demequinaceae       | Demequina                | NA          |
| 1694 | ASV472 |  | 0 3B_11 | Proteobacteria    | Devosiaceae         | Devosia                  | enhydra     |
| 1695 | ASV472 |  | 0 3W_8  | Proteobacteria    | Devosiaceae         | Devosia                  | enhydra     |
| 1696 | ASV472 |  | 0 3B_8  | Proteobacteria    | Devosiaceae         | Devosia                  | enhydra     |
| 1697 | ASV474 |  | 0 3B_8  | Myxococcota       | Haliangiaceae       | Haliangium               | NA          |
| 1698 | ASV474 |  | 0 3B_11 | Myxococcota       | Haliangiaceae       | Haliangium               | NA          |
| 1699 | ASV474 |  | 0 3W_8  | Myxococcota       | Haliangiaceae       | Haliangium               | NA          |
| 1700 | ASV480 |  | 0 3B_8  | Planctomycetota   | Pirellulaceae       | Pir4 lineage             | NA          |
| 1701 | ASV480 |  | 0 3B_11 | Planctomycetota   | Pirellulaceae       | Pir4 lineage             | NA          |
| 1702 | ASV480 |  | 0 3W_8  | Planctomycetota   | Pirellulaceae       | Pir4 lineage             | NA          |
| 1703 | ASV482 |  | 0 3B_11 | Proteobacteria    | Rhodobacteraceae    | Cereibacter              | changlensis |
| 1704 | ASV482 |  | 0 3B_8  | Proteobacteria    | Rhodobacteraceae    | Cereibacter              | changlensis |
| 1705 | ASV482 |  | 0 3W_8  | Proteobacteria    | Rhodobacteraceae    | Cereibacter              | changlensis |
| 1706 | ASV483 |  | 0 3B_8  | Myxococcota       | Sandaracinaceae     | Sandaracinus             | NA          |
| 1707 | ASV483 |  | 0 3B_11 | Myxococcota       | Sandaracinaceae     | Sandaracinus             | NA          |
| 1708 | ASV483 |  | 0 3W_8  | Myxococcota       | Sandaracinaceae     | Sandaracinus             | NA          |
| 1709 | ASV487 |  | 0 3B_8  | Proteobacteria    | Legionellaceae      | Legionella               | NA          |
| 1710 | ASV487 |  | 0 3W_8  | Proteobacteria    | Legionellaceae      | Legionella               | NA          |
| 1711 | ASV487 |  | 0 3B_11 | Proteobacteria    | Legionellaceae      | Legionella               | NA          |
| 1712 | ASV49  |  | 0 3W_8  | Verrucomicrobiota | Opitutaceae         | Opitutus                 | NA          |
| 1713 | ASV49  |  | 0 3B_8  | Verrucomicrobiota | Opitutaceae         | Opitutus                 | NA          |

|      |        |  |         |                   |                               |                         |               |
|------|--------|--|---------|-------------------|-------------------------------|-------------------------|---------------|
| 1714 | ASV49  |  | 0 3B_11 | Verrucomicrobiota | Opitutaceae                   | Opitutus                | NA            |
| 1715 | ASV490 |  | 0 3W_8  | Gemmatimonadota   | Gemmatimonadaceae             | Gemmatimonas            | NA            |
| 1716 | ASV490 |  | 0 3B_11 | Gemmatimonadota   | Gemmatimonadaceae             | Gemmatimonas            | NA            |
| 1717 | ASV490 |  | 0 3B_8  | Gemmatimonadota   | Gemmatimonadaceae             | Gemmatimonas            | NA            |
| 1718 | ASV491 |  | 0 3W_8  | Proteobacteria    | Sphingomonadaceae             | Ellin6055               | NA            |
| 1719 | ASV491 |  | 0 3B_11 | Proteobacteria    | Sphingomonadaceae             | Ellin6055               | NA            |
| 1720 | ASV491 |  | 0 3B_8  | Proteobacteria    | Sphingomonadaceae             | Ellin6055               | NA            |
| 1721 | ASV497 |  | 0 3B_11 | Actinobacteriota  | Actinomycetaceae              | Actinomyces             | odontolyticus |
| 1722 | ASV497 |  | 0 3B_8  | Actinobacteriota  | Actinomycetaceae              | Actinomyces             | odontolyticus |
| 1723 | ASV497 |  | 0 3W_8  | Actinobacteriota  | Actinomycetaceae              | Actinomyces             | odontolyticus |
| 1724 | ASV498 |  | 0 3B_11 | Bacteroidota      | Chitinophagaceae              | Puia                    | NA            |
| 1725 | ASV498 |  | 0 3B_8  | Bacteroidota      | Chitinophagaceae              | Puia                    | NA            |
| 1726 | ASV498 |  | 0 3W_8  | Bacteroidota      | Chitinophagaceae              | Puia                    | NA            |
| 1727 | ASV50  |  | 0 3W_8  | Proteobacteria    | Alteromonadaceae              | Rheinheimera            | pacifica      |
| 1728 | ASV50  |  | 0 3B_8  | Proteobacteria    | Alteromonadaceae              | Rheinheimera            | pacifica      |
| 1729 | ASV50  |  | 0 3B_11 | Proteobacteria    | Alteromonadaceae              | Rheinheimera            | pacifica      |
| 1730 | ASV514 |  | 0 3B_8  | Proteobacteria    | Xanthomonadaceae              | Lysobacter              | NA            |
| 1731 | ASV514 |  | 0 3B_11 | Proteobacteria    | Xanthomonadaceae              | Lysobacter              | NA            |
| 1732 | ASV514 |  | 0 3W_8  | Proteobacteria    | Xanthomonadaceae              | Lysobacter              | NA            |
| 1733 | ASV519 |  | 0 3B_8  | Proteobacteria    | Azospirillales Incertae Sedis | Stella                  | humosa        |
| 1734 | ASV519 |  | 0 3W_8  | Proteobacteria    | Azospirillales Incertae Sedis | Stella                  | humosa        |
| 1735 | ASV519 |  | 0 3B_11 | Proteobacteria    | Azospirillales Incertae Sedis | Stella                  | humosa        |
| 1736 | ASV53  |  | 0 3B_11 | Proteobacteria    | Oxalobacteraceae              | Undibacterium           | parvum        |
| 1737 | ASV53  |  | 0 3B_8  | Proteobacteria    | Oxalobacteraceae              | Undibacterium           | parvum        |
| 1738 | ASV533 |  | 0 3B_8  | Actinobacteriota  | Kineosporiaceae               | Kineosporia             | rhamnosa      |
| 1739 | ASV533 |  | 0 3W_8  | Actinobacteriota  | Kineosporiaceae               | Kineosporia             | rhamnosa      |
| 1740 | ASV533 |  | 0 3B_11 | Actinobacteriota  | Kineosporiaceae               | Kineosporia             | rhamnosa      |
| 1741 | ASV534 |  | 0 3B_11 | Chloroflexi       | Anaerolineaceae               | Anaerolineaceae UCG-001 | NA            |
| 1742 | ASV534 |  | 0 3B_8  | Chloroflexi       | Anaerolineaceae               | Anaerolineaceae UCG-001 | NA            |
| 1743 | ASV538 |  | 0 3B_11 | Bdellovibrionota  | Bacteriovoracaceae            | Peredibacter            | starrii       |
| 1744 | ASV538 |  | 0 3B_8  | Bdellovibrionota  | Bacteriovoracaceae            | Peredibacter            | starrii       |
| 1745 | ASV538 |  | 0 3W_8  | Bdellovibrionota  | Bacteriovoracaceae            | Peredibacter            | starrii       |
| 1746 | ASV540 |  | 0 3B_11 | Actinobacteriota  | Nocardioideaceae              | Marmoricola             | NA            |
| 1747 | ASV540 |  | 0 3W_8  | Actinobacteriota  | Nocardioideaceae              | Marmoricola             | NA            |
| 1748 | ASV540 |  | 0 3B_8  | Actinobacteriota  | Nocardioideaceae              | Marmoricola             | NA            |
| 1749 | ASV545 |  | 0 3B_11 | Proteobacteria    | Moraxellaceae                 | Cavicella               | NA            |
| 1750 | ASV545 |  | 0 3W_8  | Proteobacteria    | Moraxellaceae                 | Cavicella               | NA            |
| 1751 | ASV545 |  | 0 3B_8  | Proteobacteria    | Moraxellaceae                 | Cavicella               | NA            |
| 1752 | ASV546 |  | 0 3B_11 | Proteobacteria    | Pseudohongiellaceae           | Blyi10                  | NA            |
| 1753 | ASV546 |  | 0 3W_8  | Proteobacteria    | Pseudohongiellaceae           | Blyi10                  | NA            |
| 1754 | ASV546 |  | 0 3B_8  | Proteobacteria    | Pseudohongiellaceae           | Blyi10                  | NA            |
| 1755 | ASV548 |  | 0 3W_8  | Proteobacteria    | Rhodanobacteraceae            | Chiayiivirga            | NA            |
| 1756 | ASV548 |  | 0 3B_11 | Proteobacteria    | Rhodanobacteraceae            | Chiayiivirga            | NA            |
| 1757 | ASV548 |  | 0 3B_8  | Proteobacteria    | Rhodanobacteraceae            | Chiayiivirga            | NA            |
| 1758 | ASV55  |  | 0 3W_11 | Bacteroidota      | Chitinophagaceae              | Terrimonas              | solii         |
| 1759 | ASV552 |  | 0 3B_11 | Proteobacteria    | Rhodocyclaceae                | Propionivibrio          | NA            |
| 1760 | ASV552 |  | 0 3B_8  | Proteobacteria    | Rhodocyclaceae                | Propionivibrio          | NA            |
| 1761 | ASV552 |  | 0 3W_8  | Proteobacteria    | Rhodocyclaceae                | Propionivibrio          | NA            |
| 1762 | ASV553 |  | 0 3B_8  | Proteobacteria    | Acetobacteraceae              | Roseomonas              | tokyonensis   |

|      |        |   |       |                  |                     |                   |                  |
|------|--------|---|-------|------------------|---------------------|-------------------|------------------|
| 1763 | ASV553 | 0 | 3W_8  | Proteobacteria   | Acetobacteraceae    | Roseomonas        | tokyonensis      |
| 1764 | ASV553 | 0 | 3B_11 | Proteobacteria   | Acetobacteraceae    | Roseomonas        | tokyonensis      |
| 1765 | ASV559 | 0 | 3B_8  | Proteobacteria   | Rhizobiaceae        | Aminobacter       | NA               |
| 1766 | ASV559 | 0 | 3W_8  | Proteobacteria   | Rhizobiaceae        | Aminobacter       | NA               |
| 1767 | ASV559 | 0 | 3B_11 | Proteobacteria   | Rhizobiaceae        | Aminobacter       | NA               |
| 1768 | ASV56  | 0 | 3B_8  | Proteobacteria   | Comamonadaceae      | Rhodoferrax       | NA               |
| 1769 | ASV56  | 0 | 3B_11 | Proteobacteria   | Comamonadaceae      | Rhodoferrax       | NA               |
| 1770 | ASV568 | 0 | 3B_8  | Bacteroidota     | Chitinophagaceae    | Sediminibacterium | NA               |
| 1771 | ASV568 | 0 | 3B_11 | Bacteroidota     | Chitinophagaceae    | Sediminibacterium | NA               |
| 1772 | ASV569 | 0 | 3W_8  | Proteobacteria   | Comamonadaceae      | Polaromonas       | eurypsychrophila |
| 1773 | ASV569 | 0 | 3B_11 | Proteobacteria   | Comamonadaceae      | Polaromonas       | eurypsychrophila |
| 1774 | ASV569 | 0 | 3B_8  | Proteobacteria   | Comamonadaceae      | Polaromonas       | eurypsychrophila |
| 1775 | ASV57  | 0 | 3B_8  | Bacteroidota     | Cyclobacteriaceae   | Algoriphagus      | NA               |
| 1776 | ASV57  | 0 | 3B_11 | Bacteroidota     | Cyclobacteriaceae   | Algoriphagus      | NA               |
| 1777 | ASV576 | 0 | 3B_8  | Proteobacteria   | Xanthobacteraceae   | Tardiphaga        | robiniae         |
| 1778 | ASV576 | 0 | 3W_8  | Proteobacteria   | Xanthobacteraceae   | Tardiphaga        | robiniae         |
| 1779 | ASV576 | 0 | 3B_11 | Proteobacteria   | Xanthobacteraceae   | Tardiphaga        | robiniae         |
| 1780 | ASV577 | 0 | 3W_8  | Proteobacteria   | Beijerinckiaceae    | Microvirga        | NA               |
| 1781 | ASV577 | 0 | 3B_11 | Proteobacteria   | Beijerinckiaceae    | Microvirga        | NA               |
| 1782 | ASV577 | 0 | 3B_8  | Proteobacteria   | Beijerinckiaceae    | Microvirga        | NA               |
| 1783 | ASV58  | 0 | 3W_8  | Proteobacteria   | Xanthomonadaceae    | Thermomonas       | NA               |
| 1784 | ASV58  | 0 | 3B_11 | Proteobacteria   | Xanthomonadaceae    | Thermomonas       | NA               |
| 1785 | ASV58  | 0 | 3B_8  | Proteobacteria   | Xanthomonadaceae    | Thermomonas       | NA               |
| 1786 | ASV585 | 0 | 3B_8  | Planctomycetota  | Gemmataceae         | Zavarzinella      | NA               |
| 1787 | ASV585 | 0 | 3B_11 | Planctomycetota  | Gemmataceae         | Zavarzinella      | NA               |
| 1788 | ASV585 | 0 | 3W_8  | Planctomycetota  | Gemmataceae         | Zavarzinella      | NA               |
| 1789 | ASV59  | 0 | 3B_11 | Actinobacteriota | Microbacteriaceae   | Galbitalea        | NA               |
| 1790 | ASV59  | 0 | 3W_8  | Actinobacteriota | Microbacteriaceae   | Galbitalea        | NA               |
| 1791 | ASV59  | 0 | 3B_8  | Actinobacteriota | Microbacteriaceae   | Galbitalea        | NA               |
| 1792 | ASV592 | 0 | 3B_8  | Proteobacteria   | Sphingomonadaceae   | Sphingourantiacus | NA               |
| 1793 | ASV592 | 0 | 3W_8  | Proteobacteria   | Sphingomonadaceae   | Sphingourantiacus | NA               |
| 1794 | ASV592 | 0 | 3B_11 | Proteobacteria   | Sphingomonadaceae   | Sphingourantiacus | NA               |
| 1795 | ASV596 | 0 | 3B_8  | Proteobacteria   | Xanthomonadaceae    | Arenimonas        | aquatica         |
| 1796 | ASV596 | 0 | 3W_8  | Proteobacteria   | Xanthomonadaceae    | Arenimonas        | aquatica         |
| 1797 | ASV596 | 0 | 3B_11 | Proteobacteria   | Xanthomonadaceae    | Arenimonas        | aquatica         |
| 1798 | ASV597 | 0 | 3B_8  | Bacteroidota     | Crocinitomicaceae   | Fluviicola        | NA               |
| 1799 | ASV597 | 0 | 3W_8  | Bacteroidota     | Crocinitomicaceae   | Fluviicola        | NA               |
| 1800 | ASV597 | 0 | 3B_11 | Bacteroidota     | Crocinitomicaceae   | Fluviicola        | NA               |
| 1801 | ASV615 | 0 | 3B_8  | Proteobacteria   | Sphingomonadaceae   | Sphingourantiacus | polygranulatus   |
| 1802 | ASV615 | 0 | 3W_8  | Proteobacteria   | Sphingomonadaceae   | Sphingourantiacus | polygranulatus   |
| 1803 | ASV615 | 0 | 3B_11 | Proteobacteria   | Sphingomonadaceae   | Sphingourantiacus | polygranulatus   |
| 1804 | ASV620 | 0 | 3B_8  | Actinobacteriota | Micrococcaceae      | Glutamicibacter   | NA               |
| 1805 | ASV620 | 0 | 3W_8  | Actinobacteriota | Micrococcaceae      | Glutamicibacter   | NA               |
| 1806 | ASV620 | 0 | 3B_11 | Actinobacteriota | Micrococcaceae      | Glutamicibacter   | NA               |
| 1807 | ASV625 | 0 | 3W_8  | Proteobacteria   | Comamonadaceae      | Caenimonas        | NA               |
| 1808 | ASV625 | 0 | 3B_8  | Proteobacteria   | Comamonadaceae      | Caenimonas        | NA               |
| 1809 | ASV625 | 0 | 3B_11 | Proteobacteria   | Comamonadaceae      | Caenimonas        | NA               |
| 1810 | ASV63  | 0 | 3W_11 | Proteobacteria   | Sphingomonadaceae   | Sphingomonas      | sanxanigenens    |
| 1811 | ASV630 | 0 | 3W_8  | Bacteroidota     | Sphingobacteriaceae | Pedobacter        | bambusae         |

|      |        |   |       |                  |                      |                   |               |
|------|--------|---|-------|------------------|----------------------|-------------------|---------------|
| 1812 | ASV630 | 0 | 3B_11 | Bacteroidota     | Sphingobacteriaceae  | Pedobacter        | bambusae      |
| 1813 | ASV630 | 0 | 3B_8  | Bacteroidota     | Sphingobacteriaceae  | Pedobacter        | bambusae      |
| 1814 | ASV633 | 0 | 3B_8  | Proteobacteria   | Sphingomonadaceae    | Rhizorhapis       | NA            |
| 1815 | ASV633 | 0 | 3B_11 | Proteobacteria   | Sphingomonadaceae    | Rhizorhapis       | NA            |
| 1816 | ASV633 | 0 | 3W_8  | Proteobacteria   | Sphingomonadaceae    | Rhizorhapis       | NA            |
| 1817 | ASV637 | 0 | 3B_8  | Proteobacteria   | Moraxellaceae        | Alkanindiges      | illinoisensis |
| 1818 | ASV637 | 0 | 3B_11 | Proteobacteria   | Moraxellaceae        | Alkanindiges      | illinoisensis |
| 1819 | ASV637 | 0 | 3W_8  | Proteobacteria   | Moraxellaceae        | Alkanindiges      | illinoisensis |
| 1820 | ASV638 | 0 | 3B_11 | Bacteroidota     | Chitinophagaceae     | Niastella         | NA            |
| 1821 | ASV638 | 0 | 3W_8  | Bacteroidota     | Chitinophagaceae     | Niastella         | NA            |
| 1822 | ASV638 | 0 | 3B_8  | Bacteroidota     | Chitinophagaceae     | Niastella         | NA            |
| 1823 | ASV639 | 0 | 3B_8  | Actinobacteriota | Streptosporangiaceae | Sphaerisporangium | NA            |
| 1824 | ASV639 | 0 | 3W_11 | Actinobacteriota | Streptosporangiaceae | Sphaerisporangium | NA            |
| 1825 | ASV639 | 0 | 3B_11 | Actinobacteriota | Streptosporangiaceae | Sphaerisporangium | NA            |
| 1826 | ASV641 | 0 | 3B_8  | Actinobacteriota | Microbacteriaceae    | Marisediminicola  | NA            |
| 1827 | ASV641 | 0 | 3W_8  | Actinobacteriota | Microbacteriaceae    | Marisediminicola  | NA            |
| 1828 | ASV641 | 0 | 3B_11 | Actinobacteriota | Microbacteriaceae    | Marisediminicola  | NA            |
| 1829 | ASV644 | 0 | 3B_8  | Proteobacteria   | Acetobacteraceae     | Roseomonas        | frigidaquae   |
| 1830 | ASV644 | 0 | 3W_11 | Proteobacteria   | Acetobacteraceae     | Roseomonas        | frigidaquae   |
| 1831 | ASV644 | 0 | 3B_11 | Proteobacteria   | Acetobacteraceae     | Roseomonas        | frigidaquae   |
| 1832 | ASV646 | 0 | 3B_11 | Proteobacteria   | Sphingomonadaceae    | Sphingosinicella  | solii         |
| 1833 | ASV646 | 0 | 3W_8  | Proteobacteria   | Sphingomonadaceae    | Sphingosinicella  | solii         |
| 1834 | ASV646 | 0 | 3B_8  | Proteobacteria   | Sphingomonadaceae    | Sphingosinicella  | solii         |
| 1835 | ASV649 | 0 | 3W_8  | Proteobacteria   | Acetobacteraceae     | Rubritepida       | NA            |
| 1836 | ASV649 | 0 | 3B_8  | Proteobacteria   | Acetobacteraceae     | Rubritepida       | NA            |
| 1837 | ASV649 | 0 | 3B_11 | Proteobacteria   | Acetobacteraceae     | Rubritepida       | NA            |
| 1838 | ASV650 | 0 | 3B_11 | Actinobacteriota | Intrasporangiaceae   | Tetrasphaera      | NA            |
| 1839 | ASV650 | 0 | 3B_8  | Actinobacteriota | Intrasporangiaceae   | Tetrasphaera      | NA            |
| 1840 | ASV650 | 0 | 3W_8  | Actinobacteriota | Intrasporangiaceae   | Tetrasphaera      | NA            |
| 1841 | ASV655 | 0 | 3B_8  | Proteobacteria   | Rhodobacteraceae     | Rubellimicrobium  | NA            |
| 1842 | ASV655 | 0 | 3B_11 | Proteobacteria   | Rhodobacteraceae     | Rubellimicrobium  | NA            |
| 1843 | ASV655 | 0 | 3W_8  | Proteobacteria   | Rhodobacteraceae     | Rubellimicrobium  | NA            |
| 1844 | ASV659 | 0 | 3B_8  | Actinobacteriota | Cellulomonadaceae    | Actinotalea       | NA            |
| 1845 | ASV659 | 0 | 3W_11 | Actinobacteriota | Cellulomonadaceae    | Actinotalea       | NA            |
| 1846 | ASV659 | 0 | 3B_11 | Actinobacteriota | Cellulomonadaceae    | Actinotalea       | NA            |
| 1847 | ASV66  | 0 | 3B_11 | Proteobacteria   | Comamonadaceae       | Variovorax        | NA            |
| 1848 | ASV66  | 0 | 3W_8  | Proteobacteria   | Comamonadaceae       | Variovorax        | NA            |
| 1849 | ASV66  | 0 | 3B_8  | Proteobacteria   | Comamonadaceae       | Variovorax        | NA            |
| 1850 | ASV667 | 0 | 3B_8  | Bacteroidota     | Chitinophagaceae     | Dinghuibacter     | NA            |
| 1851 | ASV667 | 0 | 3B_11 | Bacteroidota     | Chitinophagaceae     | Dinghuibacter     | NA            |
| 1852 | ASV667 | 0 | 3W_8  | Bacteroidota     | Chitinophagaceae     | Dinghuibacter     | NA            |
| 1853 | ASV67  | 0 | 3B_8  | Actinobacteriota | Solirubrobacteraceae | Patulibacter      | minatonensis  |
| 1854 | ASV67  | 0 | 3B_11 | Actinobacteriota | Solirubrobacteraceae | Patulibacter      | minatonensis  |
| 1855 | ASV67  | 0 | 3W_8  | Actinobacteriota | Solirubrobacteraceae | Patulibacter      | minatonensis  |
| 1856 | ASV672 | 0 | 3W_8  | Actinobacteriota | Micromonosporaceae   | Actinoplanes      | NA            |
| 1857 | ASV672 | 0 | 3B_8  | Actinobacteriota | Micromonosporaceae   | Actinoplanes      | NA            |
| 1858 | ASV672 | 0 | 3B_11 | Actinobacteriota | Micromonosporaceae   | Actinoplanes      | NA            |
| 1859 | ASV674 | 0 | 3B_11 | Firmicutes       | Paenibacillaceae     | Thermobacillus    | NA            |
| 1860 | ASV674 | 0 | 3W_11 | Firmicutes       | Paenibacillaceae     | Thermobacillus    | NA            |

|      |        |   |       |                   |                     |                        |              |
|------|--------|---|-------|-------------------|---------------------|------------------------|--------------|
| 1861 | ASV674 | 0 | 3B_8  | Firmicutes        | Paenibacillaceae    | Thermobacillus         | NA           |
| 1862 | ASV676 | 0 | 3B_11 | Proteobacteria    | Devosiaceae         | Devosia                | geojensis    |
| 1863 | ASV676 | 0 | 3W_8  | Proteobacteria    | Devosiaceae         | Devosia                | geojensis    |
| 1864 | ASV676 | 0 | 3B_8  | Proteobacteria    | Devosiaceae         | Devosia                | geojensis    |
| 1865 | ASV677 | 0 | 3B_8  | Verrucomicrobiota | Chthoniobacteraceae | Candidatus Udaeobacter | NA           |
| 1866 | ASV677 | 0 | 3B_11 | Verrucomicrobiota | Chthoniobacteraceae | Candidatus Udaeobacter | NA           |
| 1867 | ASV677 | 0 | 3W_8  | Verrucomicrobiota | Chthoniobacteraceae | Candidatus Udaeobacter | NA           |
| 1868 | ASV680 | 0 | 3B_11 | Actinobacteriota  | Bifidobacteriaceae  | Bifidobacterium        | NA           |
| 1869 | ASV680 | 0 | 3B_8  | Actinobacteriota  | Bifidobacteriaceae  | Bifidobacterium        | NA           |
| 1870 | ASV696 | 0 | 3B_11 | Verrucomicrobiota | Opitutaceae         | Diplosphaera           | NA           |
| 1871 | ASV696 | 0 | 3W_8  | Verrucomicrobiota | Opitutaceae         | Diplosphaera           | NA           |
| 1872 | ASV696 | 0 | 3B_8  | Verrucomicrobiota | Opitutaceae         | Diplosphaera           | NA           |
| 1873 | ASV698 | 0 | 3W_8  | Myxococcota       | Myxococcaceae       | Coralloccoccus         | NA           |
| 1874 | ASV698 | 0 | 3B_8  | Myxococcota       | Myxococcaceae       | Coralloccoccus         | NA           |
| 1875 | ASV698 | 0 | 3B_11 | Myxococcota       | Myxococcaceae       | Coralloccoccus         | NA           |
| 1876 | ASV70  | 0 | 3B_8  | Proteobacteria    | Oxalobacteraceae    | Massilia               | NA           |
| 1877 | ASV701 | 0 | 3W_11 | Actinobacteriota  | Thermomonosporaceae | Actinoallomurus        | bryophytorum |
| 1878 | ASV701 | 0 | 3B_8  | Actinobacteriota  | Thermomonosporaceae | Actinoallomurus        | bryophytorum |
| 1879 | ASV701 | 0 | 3B_11 | Actinobacteriota  | Thermomonosporaceae | Actinoallomurus        | bryophytorum |
| 1880 | ASV702 | 0 | 3W_8  | Verrucomicrobiota | Verrucomicrobiaceae | Prostheobacter         | NA           |
| 1881 | ASV702 | 0 | 3B_11 | Verrucomicrobiota | Verrucomicrobiaceae | Prostheobacter         | NA           |
| 1882 | ASV702 | 0 | 3B_8  | Verrucomicrobiota | Verrucomicrobiaceae | Prostheobacter         | NA           |
| 1883 | ASV709 | 0 | 3W_8  | Actinobacteriota  | Iamiaceae           | Iamia                  | NA           |
| 1884 | ASV709 | 0 | 3B_11 | Actinobacteriota  | Iamiaceae           | Iamia                  | NA           |
| 1885 | ASV709 | 0 | 3B_8  | Actinobacteriota  | Iamiaceae           | Iamia                  | NA           |
| 1886 | ASV71  | 0 | 3W_8  | Proteobacteria    | Ferrovibrionaceae   | Ferrovibrio            | NA           |
| 1887 | ASV71  | 0 | 3W_11 | Proteobacteria    | Ferrovibrionaceae   | Ferrovibrio            | NA           |
| 1888 | ASV710 | 0 | 3W_8  | Proteobacteria    | Xanthobacteraceae   | Tardiphaga             | NA           |
| 1889 | ASV710 | 0 | 3B_11 | Proteobacteria    | Xanthobacteraceae   | Tardiphaga             | NA           |
| 1890 | ASV710 | 0 | 3B_8  | Proteobacteria    | Xanthobacteraceae   | Tardiphaga             | NA           |
| 1891 | ASV711 | 0 | 3W_8  | Acidobacteriota   | Blastocatellaceae   | Blastocatella          | NA           |
| 1892 | ASV711 | 0 | 3B_11 | Acidobacteriota   | Blastocatellaceae   | Blastocatella          | NA           |
| 1893 | ASV711 | 0 | 3B_8  | Acidobacteriota   | Blastocatellaceae   | Blastocatella          | NA           |
| 1894 | ASV712 | 0 | 3W_8  | Bacteroidota      | Hymenobacteraceae   | Adhaeribacter          | NA           |
| 1895 | ASV712 | 0 | 3B_8  | Bacteroidota      | Hymenobacteraceae   | Adhaeribacter          | NA           |
| 1896 | ASV712 | 0 | 3B_11 | Bacteroidota      | Hymenobacteraceae   | Adhaeribacter          | NA           |
| 1897 | ASV713 | 0 | 3W_8  | Firmicutes        | Family XI           | Finegoldia             | magna        |
| 1898 | ASV713 | 0 | 3B_8  | Firmicutes        | Family XI           | Finegoldia             | magna        |
| 1899 | ASV715 | 0 | 3B_8  | Bacteroidota      | Prevotellaceae      | Prevotella             | intermedia   |
| 1900 | ASV715 | 0 | 3W_8  | Bacteroidota      | Prevotellaceae      | Prevotella             | intermedia   |
| 1901 | ASV715 | 0 | 3B_11 | Bacteroidota      | Prevotellaceae      | Prevotella             | intermedia   |
| 1902 | ASV716 | 0 | 3B_11 | Planctomycetota   | Pirellulaceae       | Rhodopirellula         | NA           |
| 1903 | ASV716 | 0 | 3B_8  | Planctomycetota   | Pirellulaceae       | Rhodopirellula         | NA           |
| 1904 | ASV718 | 0 | 3W_8  | Verrucomicrobiota | Opitutaceae         | Cephalotococcus        | NA           |
| 1905 | ASV718 | 0 | 3B_11 | Verrucomicrobiota | Opitutaceae         | Cephalotococcus        | NA           |
| 1906 | ASV718 | 0 | 3B_8  | Verrucomicrobiota | Opitutaceae         | Cephalotococcus        | NA           |
| 1907 | ASV724 | 0 | 3B_11 | Bacteroidota      | Chitinophagaceae    | Terrimonas             | crocea       |
| 1908 | ASV724 | 0 | 3W_8  | Bacteroidota      | Chitinophagaceae    | Terrimonas             | crocea       |
| 1909 | ASV724 | 0 | 3B_8  | Bacteroidota      | Chitinophagaceae    | Terrimonas             | crocea       |

|      |        |  |         |                  |                      |                  |                |
|------|--------|--|---------|------------------|----------------------|------------------|----------------|
| 1910 | ASV729 |  | 0 3B_8  | Actinobacteriota | Corynebacteriaceae   | Corynebacterium  | genitalium     |
| 1911 | ASV729 |  | 0 3B_11 | Actinobacteriota | Corynebacteriaceae   | Corynebacterium  | genitalium     |
| 1912 | ASV730 |  | 0 3B_8  | Actinobacteriota | Streptosporangiaceae | Sphaerimonospora | NA             |
| 1913 | ASV730 |  | 0 3B_11 | Actinobacteriota | Streptosporangiaceae | Sphaerimonospora | NA             |
| 1914 | ASV730 |  | 0 3W_11 | Actinobacteriota | Streptosporangiaceae | Sphaerimonospora | NA             |
| 1915 | ASV732 |  | 0 3B_11 | Bacteroidota     | Chitinophagaceae     | Flavitalea       | NA             |
| 1916 | ASV732 |  | 0 3B_8  | Bacteroidota     | Chitinophagaceae     | Flavitalea       | NA             |
| 1917 | ASV732 |  | 0 3W_8  | Bacteroidota     | Chitinophagaceae     | Flavitalea       | NA             |
| 1918 | ASV738 |  | 0 3B_8  | Actinobacteriota | Nakamurellaceae      | Nakamurella      | flavida        |
| 1919 | ASV738 |  | 0 3W_8  | Actinobacteriota | Nakamurellaceae      | Nakamurella      | flavida        |
| 1920 | ASV738 |  | 0 3B_11 | Actinobacteriota | Nakamurellaceae      | Nakamurella      | flavida        |
| 1921 | ASV742 |  | 0 3B_8  | Bacteroidota     | Cytophagaceae        | Cytophaga        | NA             |
| 1922 | ASV742 |  | 0 3B_11 | Bacteroidota     | Cytophagaceae        | Cytophaga        | NA             |
| 1923 | ASV742 |  | 0 3W_8  | Bacteroidota     | Cytophagaceae        | Cytophaga        | NA             |
| 1924 | ASV751 |  | 0 3B_8  | Proteobacteria   | Rhodobacteraceae     | Amaricoccus      | NA             |
| 1925 | ASV751 |  | 0 3B_11 | Proteobacteria   | Rhodobacteraceae     | Amaricoccus      | NA             |
| 1926 | ASV751 |  | 0 3W_8  | Proteobacteria   | Rhodobacteraceae     | Amaricoccus      | NA             |
| 1927 | ASV758 |  | 0 3B_8  | Bacteroidota     | Flavobacteriaceae    | Flavobacterium   | saccharophilum |
| 1928 | ASV758 |  | 0 3B_11 | Bacteroidota     | Flavobacteriaceae    | Flavobacterium   | saccharophilum |
| 1929 | ASV758 |  | 0 3W_8  | Bacteroidota     | Flavobacteriaceae    | Flavobacterium   | saccharophilum |
| 1930 | ASV759 |  | 0 3B_8  | Proteobacteria   | Devosiaceae          | Devosia          | psychrophila   |
| 1931 | ASV759 |  | 0 3B_11 | Proteobacteria   | Devosiaceae          | Devosia          | psychrophila   |
| 1932 | ASV759 |  | 0 3W_8  | Proteobacteria   | Devosiaceae          | Devosia          | psychrophila   |
| 1933 | ASV760 |  | 0 3B_8  | Firmicutes       | Bacillaceae          | Anoxybacillus    | NA             |
| 1934 | ASV760 |  | 0 3B_11 | Firmicutes       | Bacillaceae          | Anoxybacillus    | NA             |
| 1935 | ASV765 |  | 0 3B_8  | Planctomycetota  | Rubinisphaeraceae    | SH-PL14          | NA             |
| 1936 | ASV765 |  | 0 3W_8  | Planctomycetota  | Rubinisphaeraceae    | SH-PL14          | NA             |
| 1937 | ASV765 |  | 0 3B_11 | Planctomycetota  | Rubinisphaeraceae    | SH-PL14          | NA             |
| 1938 | ASV77  |  | 0 3B_8  | Proteobacteria   | Solimonadaceae       | Nevskia          | NA             |
| 1939 | ASV77  |  | 0 3B_11 | Proteobacteria   | Solimonadaceae       | Nevskia          | NA             |
| 1940 | ASV770 |  | 0 3W_8  | Proteobacteria   | Sphingomonadaceae    | Erythrobacter    | NA             |
| 1941 | ASV770 |  | 0 3B_11 | Proteobacteria   | Sphingomonadaceae    | Erythrobacter    | NA             |
| 1942 | ASV770 |  | 0 3B_8  | Proteobacteria   | Sphingomonadaceae    | Erythrobacter    | NA             |
| 1943 | ASV772 |  | 0 3B_8  | Proteobacteria   | Solimonadaceae       | Panacagrimonas   | NA             |
| 1944 | ASV772 |  | 0 3B_11 | Proteobacteria   | Solimonadaceae       | Panacagrimonas   | NA             |
| 1945 | ASV772 |  | 0 3W_8  | Proteobacteria   | Solimonadaceae       | Panacagrimonas   | NA             |
| 1946 | ASV773 |  | 0 3B_11 | Proteobacteria   | Comamonadaceae       | Mitsuaria        | NA             |
| 1947 | ASV773 |  | 0 3B_8  | Proteobacteria   | Comamonadaceae       | Mitsuaria        | NA             |
| 1948 | ASV773 |  | 0 3W_8  | Proteobacteria   | Comamonadaceae       | Mitsuaria        | NA             |
| 1949 | ASV778 |  | 0 3B_11 | Bacteroidota     | Sphingobacteriaceae  | Mucilaginibacter | NA             |
| 1950 | ASV778 |  | 0 3B_8  | Bacteroidota     | Sphingobacteriaceae  | Mucilaginibacter | NA             |
| 1951 | ASV778 |  | 0 3W_8  | Bacteroidota     | Sphingobacteriaceae  | Mucilaginibacter | NA             |
| 1952 | ASV78  |  | 0 3W_8  | Proteobacteria   | Xanthomonadaceae     | Arenimonas       | NA             |
| 1953 | ASV78  |  | 0 3B_11 | Proteobacteria   | Xanthomonadaceae     | Arenimonas       | NA             |
| 1954 | ASV78  |  | 0 3B_8  | Proteobacteria   | Xanthomonadaceae     | Arenimonas       | NA             |
| 1955 | ASV785 |  | 0 3B_8  | Proteobacteria   | Xanthobacteraceae    | Variibacter      | NA             |
| 1956 | ASV785 |  | 0 3W_8  | Proteobacteria   | Xanthobacteraceae    | Variibacter      | NA             |
| 1957 | ASV785 |  | 0 3B_11 | Proteobacteria   | Xanthobacteraceae    | Variibacter      | NA             |
| 1958 | ASV786 |  | 0 3B_8  | Actinobacteriota | Solirubrobacteraceae | Parviterribacter | NA             |

|      |        |   |       |                   |                       |                  |            |
|------|--------|---|-------|-------------------|-----------------------|------------------|------------|
| 1959 | ASV786 | 0 | 3W_8  | Actinobacteriota  | Solirubrobacteraceae  | Parviterribacter | NA         |
| 1960 | ASV786 | 0 | 3B_11 | Actinobacteriota  | Solirubrobacteraceae  | Parviterribacter | NA         |
| 1961 | ASV787 | 0 | 3W_8  | Proteobacteria    | Sphingomonadaceae     | Qipengyuania     | NA         |
| 1962 | ASV787 | 0 | 3B_11 | Proteobacteria    | Sphingomonadaceae     | Qipengyuania     | NA         |
| 1963 | ASV787 | 0 | 3B_8  | Proteobacteria    | Sphingomonadaceae     | Qipengyuania     | NA         |
| 1964 | ASV79  | 0 | 3B_8  | Actinobacteriota  | Corynebacteriaceae    | Corynebacterium  | NA         |
| 1965 | ASV792 | 0 | 3B_11 | Proteobacteria    | Oxalobacteraceae      | Massilia         | timonae    |
| 1966 | ASV792 | 0 | 3W_8  | Proteobacteria    | Oxalobacteraceae      | Massilia         | timonae    |
| 1967 | ASV792 | 0 | 3B_8  | Proteobacteria    | Oxalobacteraceae      | Massilia         | timonae    |
| 1968 | ASV803 | 0 | 3B_8  | Bdellovibrionota  | Bdellovibrionaceae    | OM27 clade       | NA         |
| 1969 | ASV803 | 0 | 3B_11 | Bdellovibrionota  | Bdellovibrionaceae    | OM27 clade       | NA         |
| 1970 | ASV803 | 0 | 3W_8  | Bdellovibrionota  | Bdellovibrionaceae    | OM27 clade       | NA         |
| 1971 | ASV81  | 0 | 3B_11 | Proteobacteria    | Xanthomonadaceae      | Stenotrophomonas | NA         |
| 1972 | ASV81  | 0 | 3B_8  | Proteobacteria    | Xanthomonadaceae      | Stenotrophomonas | NA         |
| 1973 | ASV81  | 0 | 3W_8  | Proteobacteria    | Xanthomonadaceae      | Stenotrophomonas | NA         |
| 1974 | ASV814 | 0 | 3B_8  | Proteobacteria    | Solimonadaceae        | Fontimonas       | NA         |
| 1975 | ASV814 | 0 | 3B_11 | Proteobacteria    | Solimonadaceae        | Fontimonas       | NA         |
| 1976 | ASV814 | 0 | 3W_8  | Proteobacteria    | Solimonadaceae        | Fontimonas       | NA         |
| 1977 | ASV816 | 0 | 3B_8  | Proteobacteria    | Kaistiaceae           | Kaistia          | NA         |
| 1978 | ASV816 | 0 | 3B_11 | Proteobacteria    | Kaistiaceae           | Kaistia          | NA         |
| 1979 | ASV816 | 0 | 3W_8  | Proteobacteria    | Kaistiaceae           | Kaistia          | NA         |
| 1980 | ASV818 | 0 | 3B_8  | Proteobacteria    | Comamonadaceae        | Azohydromonas    | lata       |
| 1981 | ASV818 | 0 | 3B_11 | Proteobacteria    | Comamonadaceae        | Azohydromonas    | lata       |
| 1982 | ASV818 | 0 | 3W_8  | Proteobacteria    | Comamonadaceae        | Azohydromonas    | lata       |
| 1983 | ASV83  | 0 | 3B_8  | Proteobacteria    | Moraxellaceae         | Acinetobacter    | NA         |
| 1984 | ASV834 | 0 | 3B_8  | Proteobacteria    | Xanthobacteraceae     | Pseudolabrys     | NA         |
| 1985 | ASV834 | 0 | 3W_8  | Proteobacteria    | Xanthobacteraceae     | Pseudolabrys     | NA         |
| 1986 | ASV834 | 0 | 3B_11 | Proteobacteria    | Xanthobacteraceae     | Pseudolabrys     | NA         |
| 1987 | ASV838 | 0 | 3W_8  | Proteobacteria    | Azospirillaceae       | Skermanella      | aerolata   |
| 1988 | ASV838 | 0 | 3B_11 | Proteobacteria    | Azospirillaceae       | Skermanella      | aerolata   |
| 1989 | ASV838 | 0 | 3B_8  | Proteobacteria    | Azospirillaceae       | Skermanella      | aerolata   |
| 1990 | ASV84  | 0 | 3B_8  | Proteobacteria    | Comamonadaceae        | Hydrogenophaga   | NA         |
| 1991 | ASV84  | 0 | 3W_8  | Proteobacteria    | Comamonadaceae        | Hydrogenophaga   | NA         |
| 1992 | ASV840 | 0 | 3B_11 | Actinobacteriota  | Solirubrobacteraceae  | JCM 18997        | NA         |
| 1993 | ASV840 | 0 | 3W_8  | Actinobacteriota  | Solirubrobacteraceae  | JCM 18997        | NA         |
| 1994 | ASV840 | 0 | 3B_8  | Actinobacteriota  | Solirubrobacteraceae  | JCM 18997        | NA         |
| 1995 | ASV846 | 0 | 3B_11 | Bacteroidota      | Saprospiraceae        | Aureispira       | NA         |
| 1996 | ASV846 | 0 | 3B_8  | Bacteroidota      | Saprospiraceae        | Aureispira       | NA         |
| 1997 | ASV846 | 0 | 3W_8  | Bacteroidota      | Saprospiraceae        | Aureispira       | NA         |
| 1998 | ASV847 | 0 | 3B_11 | Verrucomicrobiota | Opitutaceae           | Lacunisphaera    | limnophila |
| 1999 | ASV847 | 0 | 3B_8  | Verrucomicrobiota | Opitutaceae           | Lacunisphaera    | limnophila |
| 2000 | ASV847 | 0 | 3W_8  | Verrucomicrobiota | Opitutaceae           | Lacunisphaera    | limnophila |
| 2001 | ASV850 | 0 | 3B_8  | Myxococcota       | Anaeromyxobacteraceae | Anaeromyxobacter | NA         |
| 2002 | ASV850 | 0 | 3B_11 | Myxococcota       | Anaeromyxobacteraceae | Anaeromyxobacter | NA         |
| 2003 | ASV850 | 0 | 3W_8  | Myxococcota       | Anaeromyxobacteraceae | Anaeromyxobacter | NA         |
| 2004 | ASV852 | 0 | 3B_8  | Spirochaetota     | Spirochaetaceae       | Spirochaeta      | NA         |
| 2005 | ASV852 | 0 | 3W_11 | Spirochaetota     | Spirochaetaceae       | Spirochaeta      | NA         |
| 2006 | ASV852 | 0 | 3B_11 | Spirochaetota     | Spirochaetaceae       | Spirochaeta      | NA         |
| 2007 | ASV853 | 0 | 3B_11 | Firmicutes        | Paenibacillaceae      | Paenibacillus    | NA         |

|      |        |  |         |                  |                      |                           |                |
|------|--------|--|---------|------------------|----------------------|---------------------------|----------------|
| 2008 | ASV853 |  | 0 3B_8  | Firmicutes       | Paenibacillaceae     | Paenibacillus             | NA             |
| 2009 | ASV854 |  | 0 3B_8  | Firmicutes       | Lactobacillaceae     | Ligilactobacillus         | NA             |
| 2010 | ASV854 |  | 0 3W_11 | Firmicutes       | Lactobacillaceae     | Ligilactobacillus         | NA             |
| 2011 | ASV854 |  | 0 3B_11 | Firmicutes       | Lactobacillaceae     | Ligilactobacillus         | NA             |
| 2012 | ASV857 |  | 0 3B_11 | Bacteroidota     | Microscillaceae      | Flexibacter               | NA             |
| 2013 | ASV857 |  | 0 3W_8  | Bacteroidota     | Microscillaceae      | Flexibacter               | NA             |
| 2014 | ASV857 |  | 0 3B_8  | Bacteroidota     | Microscillaceae      | Flexibacter               | NA             |
| 2015 | ASV86  |  | 0 3B_11 | Myxococcota      | Myxococcaceae        | P3OB-42                   | NA             |
| 2016 | ASV861 |  | 0 3B_11 | Actinobacteriota | Solirubrobacteraceae | Solirubrobacter           | NA             |
| 2017 | ASV861 |  | 0 3W_8  | Actinobacteriota | Solirubrobacteraceae | Solirubrobacter           | NA             |
| 2018 | ASV861 |  | 0 3B_8  | Actinobacteriota | Solirubrobacteraceae | Solirubrobacter           | NA             |
| 2019 | ASV864 |  | 0 3B_11 | Proteobacteria   | Solimonadaceae       | Hydrocarboniphaga         | daqingensis    |
| 2020 | ASV864 |  | 0 3W_8  | Proteobacteria   | Solimonadaceae       | Hydrocarboniphaga         | daqingensis    |
| 2021 | ASV864 |  | 0 3B_8  | Proteobacteria   | Solimonadaceae       | Hydrocarboniphaga         | daqingensis    |
| 2022 | ASV868 |  | 0 3B_11 | Bacteroidota     | Cytophagaceae        | Siphonobacter             | NA             |
| 2023 | ASV868 |  | 0 3W_8  | Bacteroidota     | Cytophagaceae        | Siphonobacter             | NA             |
| 2024 | ASV868 |  | 0 3B_8  | Bacteroidota     | Cytophagaceae        | Siphonobacter             | NA             |
| 2025 | ASV870 |  | 0 3W_8  | Chloroflexi      | Chloroflexaceae      | FFCH7168                  | NA             |
| 2026 | ASV870 |  | 0 3B_8  | Chloroflexi      | Chloroflexaceae      | FFCH7168                  | NA             |
| 2027 | ASV870 |  | 0 3B_11 | Chloroflexi      | Chloroflexaceae      | FFCH7168                  | NA             |
| 2028 | ASV875 |  | 0 3W_8  | Firmicutes       | Planococcaceae       | Planococcus               | NA             |
| 2029 | ASV875 |  | 0 3B_11 | Firmicutes       | Planococcaceae       | Planococcus               | NA             |
| 2030 | ASV875 |  | 0 3B_8  | Firmicutes       | Planococcaceae       | Planococcus               | NA             |
| 2031 | ASV879 |  | 0 3W_8  | Bacteroidota     | Porphyromonadaceae   | Porphyromonas             | gingivalis     |
| 2032 | ASV879 |  | 0 3B_8  | Bacteroidota     | Porphyromonadaceae   | Porphyromonas             | gingivalis     |
| 2033 | ASV879 |  | 0 3B_11 | Bacteroidota     | Porphyromonadaceae   | Porphyromonas             | gingivalis     |
| 2034 | ASV88  |  | 0 3W_8  | Actinobacteriota | Intrasporangiaceae   | Knoellia                  | NA             |
| 2035 | ASV88  |  | 0 3B_8  | Actinobacteriota | Intrasporangiaceae   | Knoellia                  | NA             |
| 2036 | ASV88  |  | 0 3B_11 | Actinobacteriota | Intrasporangiaceae   | Knoellia                  | NA             |
| 2037 | ASV882 |  | 0 3B_11 | Proteobacteria   | Oxalobacteraceae     | Duganella                 | zoogloeoides   |
| 2038 | ASV882 |  | 0 3W_8  | Proteobacteria   | Oxalobacteraceae     | Duganella                 | zoogloeoides   |
| 2039 | ASV882 |  | 0 3B_8  | Proteobacteria   | Oxalobacteraceae     | Duganella                 | zoogloeoides   |
| 2040 | ASV889 |  | 0 3B_8  | Proteobacteria   | Beijerinckiaceae     | Methylobacterium-Methylor | NA             |
| 2041 | ASV889 |  | 0 3B_11 | Proteobacteria   | Beijerinckiaceae     | Methylobacterium-Methylor | NA             |
| 2042 | ASV899 |  | 0 3W_11 | Proteobacteria   | Comamonadaceae       | Malikia                   | NA             |
| 2043 | ASV899 |  | 0 3B_11 | Proteobacteria   | Comamonadaceae       | Malikia                   | NA             |
| 2044 | ASV899 |  | 0 3B_8  | Proteobacteria   | Comamonadaceae       | Malikia                   | NA             |
| 2045 | ASV9   |  | 0 3B_11 | Proteobacteria   | Moraxellaceae        | Perlucidibaca             | NA             |
| 2046 | ASV9   |  | 0 3B_8  | Proteobacteria   | Moraxellaceae        | Perlucidibaca             | NA             |
| 2047 | ASV901 |  | 0 3B_8  | Proteobacteria   | Sphingomonadaceae    | DSSF69                    | NA             |
| 2048 | ASV901 |  | 0 3W_11 | Proteobacteria   | Sphingomonadaceae    | DSSF69                    | NA             |
| 2049 | ASV904 |  | 0 3B_8  | Bacteroidota     | Spirosomaceae        | Larkinella                | terrae         |
| 2050 | ASV904 |  | 0 3B_11 | Bacteroidota     | Spirosomaceae        | Larkinella                | terrae         |
| 2051 | ASV904 |  | 0 3W_8  | Bacteroidota     | Spirosomaceae        | Larkinella                | terrae         |
| 2052 | ASV911 |  | 0 3W_8  | Proteobacteria   | Parvularculaceae     | Amphiplicatus             | NA             |
| 2053 | ASV911 |  | 0 3W_11 | Proteobacteria   | Parvularculaceae     | Amphiplicatus             | NA             |
| 2054 | ASV911 |  | 0 3B_8  | Proteobacteria   | Parvularculaceae     | Amphiplicatus             | NA             |
| 2055 | ASV912 |  | 0 3B_8  | Actinobacteriota | Corynebacteriaceae   | Corynebacterium           | kroppenstedtii |
| 2056 | ASV912 |  | 0 3W_8  | Actinobacteriota | Corynebacteriaceae   | Corynebacterium           | kroppenstedtii |

|      |        |  |         |                   |                     |                    |                   |
|------|--------|--|---------|-------------------|---------------------|--------------------|-------------------|
| 2057 | ASV913 |  | 0 3B_8  | Firmicutes        | Veillonellaceae     | Veillonella        | NA                |
| 2058 | ASV928 |  | 0 3B_8  | Actinobacteriota  | Micrococcaceae      | Neomicrococcus     | aestuarii         |
| 2059 | ASV928 |  | 0 3B_11 | Actinobacteriota  | Micrococcaceae      | Neomicrococcus     | aestuarii         |
| 2060 | ASV928 |  | 0 3W_8  | Actinobacteriota  | Micrococcaceae      | Neomicrococcus     | aestuarii         |
| 2061 | ASV93  |  | 0 3B_8  | Proteobacteria    | Xanthobacteraceae   | Rhodoplanes        | NA                |
| 2062 | ASV93  |  | 0 3B_11 | Proteobacteria    | Xanthobacteraceae   | Rhodoplanes        | NA                |
| 2063 | ASV932 |  | 0 3W_8  | Acidobacteriota   | Vicinamibacteraceae | Luteitalea         | NA                |
| 2064 | ASV932 |  | 0 3B_8  | Acidobacteriota   | Vicinamibacteraceae | Luteitalea         | NA                |
| 2065 | ASV932 |  | 0 3B_11 | Acidobacteriota   | Vicinamibacteraceae | Luteitalea         | NA                |
| 2066 | ASV935 |  | 0 3B_11 | Firmicutes        | Carnobacteriaceae   | Granulicatella     | NA                |
| 2067 | ASV935 |  | 0 3B_8  | Firmicutes        | Carnobacteriaceae   | Granulicatella     | NA                |
| 2068 | ASV936 |  | 0 3B_8  | Verrucomicrobiota | Parachlamydiaceae   | Neochlamydia       | NA                |
| 2069 | ASV938 |  | 0 3W_8  | Proteobacteria    | Sphingomonadaceae   | Novosphingobium    | ginsenosidimutans |
| 2070 | ASV938 |  | 0 3B_8  | Proteobacteria    | Sphingomonadaceae   | Novosphingobium    | ginsenosidimutans |
| 2071 | ASV938 |  | 0 3B_11 | Proteobacteria    | Sphingomonadaceae   | Novosphingobium    | ginsenosidimutans |
| 2072 | ASV939 |  | 0 3B_8  | Proteobacteria    | Rhodocyclaceae      | Uliginosibacterium | sediminicola      |
| 2073 | ASV939 |  | 0 3B_11 | Proteobacteria    | Rhodocyclaceae      | Uliginosibacterium | sediminicola      |
| 2074 | ASV939 |  | 0 3W_8  | Proteobacteria    | Rhodocyclaceae      | Uliginosibacterium | sediminicola      |
| 2075 | ASV94  |  | 0 3B_8  | Proteobacteria    | Moraxellaceae       | Enhydrobacter      | aerosaccus        |
| 2076 | ASV94  |  | 0 3W_8  | Proteobacteria    | Moraxellaceae       | Enhydrobacter      | aerosaccus        |
| 2077 | ASV943 |  | 0 3B_11 | Actinobacteriota  | Micrococcaceae      | Yaniella           | NA                |
| 2078 | ASV943 |  | 0 3B_8  | Actinobacteriota  | Micrococcaceae      | Yaniella           | NA                |
| 2079 | ASV943 |  | 0 3W_8  | Actinobacteriota  | Micrococcaceae      | Yaniella           | NA                |
| 2080 | ASV947 |  | 0 3W_8  | Proteobacteria    | Rhodanobacteraceae  | Tahibacter         | NA                |
| 2081 | ASV947 |  | 0 3B_8  | Proteobacteria    | Rhodanobacteraceae  | Tahibacter         | NA                |
| 2082 | ASV947 |  | 0 3B_11 | Proteobacteria    | Rhodanobacteraceae  | Tahibacter         | NA                |
| 2083 | ASV951 |  | 0 3B_8  | Proteobacteria    | Burkholderiaceae    | Lautropia          | NA                |
| 2084 | ASV951 |  | 0 3W_8  | Proteobacteria    | Burkholderiaceae    | Lautropia          | NA                |
| 2085 | ASV951 |  | 0 3B_11 | Proteobacteria    | Burkholderiaceae    | Lautropia          | NA                |
| 2086 | ASV956 |  | 0 3W_8  | Proteobacteria    | Oxalobacteraceae    | Oxalicibacterium   | NA                |
| 2087 | ASV956 |  | 0 3B_8  | Proteobacteria    | Oxalobacteraceae    | Oxalicibacterium   | NA                |
| 2088 | ASV956 |  | 0 3B_11 | Proteobacteria    | Oxalobacteraceae    | Oxalicibacterium   | NA                |
| 2089 | ASV958 |  | 0 3W_8  | Proteobacteria    | Sphingomonadaceae   | Polymorphobacter   | NA                |
| 2090 | ASV958 |  | 0 3B_8  | Proteobacteria    | Sphingomonadaceae   | Polymorphobacter   | NA                |
| 2091 | ASV958 |  | 0 3B_11 | Proteobacteria    | Sphingomonadaceae   | Polymorphobacter   | NA                |
| 2092 | ASV961 |  | 0 3B_8  | Actinobacteriota  | Micrococcaceae      | Kocuria            | NA                |
| 2093 | ASV97  |  | 0 3B_8  | Proteobacteria    | Hyphomonadaceae     | SWB02              | NA                |
| 2094 | ASV97  |  | 0 3W_8  | Proteobacteria    | Hyphomonadaceae     | SWB02              | NA                |
| 2095 | ASV97  |  | 0 3B_11 | Proteobacteria    | Hyphomonadaceae     | SWB02              | NA                |
| 2096 | ASV970 |  | 0 3W_8  | Proteobacteria    | Alcaligenaceae      | Parvibium          | NA                |
| 2097 | ASV970 |  | 0 3B_8  | Proteobacteria    | Alcaligenaceae      | Parvibium          | NA                |
| 2098 | ASV970 |  | 0 3B_11 | Proteobacteria    | Alcaligenaceae      | Parvibium          | NA                |
| 2099 | ASV972 |  | 0 3B_11 | Actinobacteriota  | Micromonosporaceae  | Actinoplanes       | digitatis         |
| 2100 | ASV972 |  | 0 3B_8  | Actinobacteriota  | Micromonosporaceae  | Actinoplanes       | digitatis         |
| 2101 | ASV972 |  | 0 3W_8  | Actinobacteriota  | Micromonosporaceae  | Actinoplanes       | digitatis         |
| 2102 | ASV973 |  | 0 3B_8  | Bacteroidota      | Microscillaceae     | Ohtaekwangia       | NA                |
| 2103 | ASV973 |  | 0 3W_8  | Bacteroidota      | Microscillaceae     | Ohtaekwangia       | NA                |
| 2104 | ASV973 |  | 0 3B_11 | Bacteroidota      | Microscillaceae     | Ohtaekwangia       | NA                |
| 2105 | ASV978 |  | 0 3W_8  | Planctomycetota   | Phycisphaeraceae    | SM1A02             | NA                |

|      |        |   |       |                  |                      |                   |              |
|------|--------|---|-------|------------------|----------------------|-------------------|--------------|
| 2106 | ASV978 | 0 | 3B_8  | Planctomycetota  | Phycisphaeraceae     | SM1A02            | NA           |
| 2107 | ASV979 | 0 | 3W_8  | Proteobacteria   | Solimonadaceae       | Hydrocarboniphaga | NA           |
| 2108 | ASV979 | 0 | 3B_11 | Proteobacteria   | Solimonadaceae       | Hydrocarboniphaga | NA           |
| 2109 | ASV979 | 0 | 3B_8  | Proteobacteria   | Solimonadaceae       | Hydrocarboniphaga | NA           |
| 2110 | ASV980 | 0 | 3W_8  | Proteobacteria   | Erwiniaceae          | Pantoea           | NA           |
| 2111 | ASV980 | 0 | 3B_11 | Proteobacteria   | Erwiniaceae          | Pantoea           | NA           |
| 2112 | ASV980 | 0 | 3B_8  | Proteobacteria   | Erwiniaceae          | Pantoea           | NA           |
| 2113 | ASV985 | 0 | 3B_11 | Proteobacteria   | Acidithiobacillaceae | KCM-B-112         | NA           |
| 2114 | ASV985 | 0 | 3B_8  | Proteobacteria   | Acidithiobacillaceae | KCM-B-112         | NA           |
| 2115 | ASV985 | 0 | 3W_8  | Proteobacteria   | Acidithiobacillaceae | KCM-B-112         | NA           |
| 2116 | ASV999 | 0 | 3B_8  | Proteobacteria   | Pseudomonadaceae     | Pseudomonas       | NA           |
| 2117 | ASV999 | 0 | 3W_8  | Proteobacteria   | Pseudomonadaceae     | Pseudomonas       | NA           |
| 2118 | ASV992 | 0 | 3B_11 | Actinobacteriota | Kineosporiaceae      | Quadrisphaera     | NA           |
| 2119 | ASV992 | 0 | 3W_8  | Actinobacteriota | Kineosporiaceae      | Quadrisphaera     | NA           |
| 2120 | ASV992 | 0 | 3B_8  | Actinobacteriota | Kineosporiaceae      | Quadrisphaera     | NA           |
| 2121 | ASV993 | 0 | 3B_8  | Bacteroidota     | Dysgonomonadaceae    | Proteiniphilum    | acetatigenes |
| 2122 | ASV993 | 0 | 3B_11 | Bacteroidota     | Dysgonomonadaceae    | Proteiniphilum    | acetatigenes |
| 2123 | ASV994 | 0 | 3B_8  | Firmicutes       | Ruminococcaceae      | Ruminococcus      | NA           |
| 2124 | ASV994 | 0 | 3W_11 | Firmicutes       | Ruminococcaceae      | Ruminococcus      | NA           |
| 2125 | ASV994 | 0 | 3B_11 | Firmicutes       | Ruminococcaceae      | Ruminococcus      | NA           |
| 2126 | ASV999 | 0 | 3W_8  | Actinobacteriota | Microbacteriaceae    | Cryobacterium     | NA           |
| 2127 | ASV999 | 0 | 3B_8  | Actinobacteriota | Microbacteriaceae    | Cryobacterium     | NA           |
| 2128 | ASV999 | 0 | 3B_11 | Actinobacteriota | Microbacteriaceae    | Cryobacterium     | NA           |

ASVs are ranked in decreasing order of abundance. 0: abundance values less than 10e-6.
