# Supplementary material
Source: Royal Society of Chemistry journal article supplement (doi:10.1039/d6ew00153j)
Supplement: d6ew00153j3.pdf [file d6ew00153j3.pdf]

genus\_abundance

|    | ASV    | Abundance           | Sample | Domain    | Phylum       | Class         | Order               | Family              | Genus               |
|----|--------|---------------------|--------|-----------|--------------|---------------|---------------------|---------------------|---------------------|
| 1  | ASV6   | 0.537938896488828   | 3B_8   | Eukaryota | Amoebozoa    | Discosea      | Longamoebia         | Centramoebida       | Acanthamoeba        |
| 2  | ASV11  | 0.406338349293206   | 3W_8   | Eukaryota | Opisthokonta | Holozoa       | Metazoa_(Animalia)  | Chromadorea         | Monhysterida        |
| 3  | ASV3   | 0.341769265845873   | 3W_8   | Eukaryota | Opisthokonta | Nuclemycea    | Fungi               | Malasseziaceae      | Malassezia          |
| 4  | ASV7   | 0.324167806657547   | 3B_11  | Eukaryota | Excavata     | Discoba       | Discicristata       | Neobodonida         | Neobodo             |
| 5  | ASV3   | 0.252713178294574   | 3W_11  | Eukaryota | Opisthokonta | Nuclemycea    | Fungi               | Malasseziaceae      | Malassezia          |
| 6  | ASV6   | 0.243866849065207   | 3B_11  | Eukaryota | Amoebozoa    | Discosea      | Longamoebia         | Centramoebida       | Acanthamoeba        |
| 7  | ASV3   | 0.21468308253534    | 3B_11  | Eukaryota | Opisthokonta | Nuclemycea    | Fungi               | Malasseziaceae      | Malassezia          |
| 8  | ASV8   | 0.175148198814409   | 3W_11  | Eukaryota | Opisthokonta | Holozoa       | Metazoa_(Animalia)  | Monogononta         | Ploimida            |
| 9  | ASV3   | 0.167259461924305   | 3B_8   | Eukaryota | Opisthokonta | Nuclemycea    | Fungi               | Malasseziaceae      | Malassezia          |
| 10 | ASV9   | 0.131782945736434   | 3W_11  | Eukaryota | SAR          | Rhizaria      | Cercozoa            | Incertae_Sedis      | Gymnophrys          |
| 11 | ASV7   | 0.110715914272686   | 3B_8   | Eukaryota | Excavata     | Discoba       | Discicristata       | Neobodonida         | Neobodo             |
| 12 | ASV21  | 0.0922936616507068  | 3B_8   | Eukaryota | SAR          | Stramenopiles | Ochrophyta          | Ochromonadales      | Paraphysomonas      |
| 13 | ASV22  | 0.079297765617875   | 3W_8   | Eukaryota | Opisthokonta | Holozoa       | Metazoa_(Animalia)  | Chromadorea         | Tylenchida          |
| 14 | ASV15  | 0.0576835385316917  | 3W_11  | Eukaryota | SAR          | Rhizaria      | Cercozoa            | Rhizaspidae         | Rhagostoma          |
| 15 | ASV16  | 0.056999544003648   | 3W_11  | Eukaryota | SAR          | Stramenopiles | Ochrophyta          | Chromulinales       | Spumella            |
| 16 | ASV21  | 0.0479252165982672  | 3B_11  | Eukaryota | SAR          | Stramenopiles | Ochrophyta          | Ochromonadales      | Paraphysomonas      |
| 17 | ASV12  | 0.0455540355677155  | 3B_11  | Eukaryota | Opisthokonta | Holozoa       | Metazoa_(Animalia)  | Tetrapoda           | Mammalia            |
| 18 | ASV12  | 0.0455084359325125  | 3W_8   | Eukaryota | Opisthokonta | Holozoa       | Metazoa_(Animalia)  | Tetrapoda           | Mammalia            |
| 19 | ASV20  | 0.0432740538075695  | 3W_11  | Eukaryota | SAR          | Alveolata     | Ciliophora          | Euplotia            | Euplotes            |
| 20 | ASV29  | 0.0430916552667579  | 3B_11  | Eukaryota | Opisthokonta | Holozoa       | Metazoa_(Animalia)  | Chromadorea         | Araeolaimida        |
| 21 | ASV39  | 0.0406748746010032  | 3W_11  | Eukaryota | Amoebozoa    | Discosea      | Fiabellinia         | Vannellida          | BIO10-D10           |
| 22 | ASV26  | 0.0372549019607843  | 3W_8   | Eukaryota | SAR          | Stramenopiles | Ochrophyta          | Eustigmatales       | Eustigmatos         |
| 23 | ASV27  | 0.036890104879161   | 3W_11  | Eukaryota | Amoebozoa    | Discosea      | Fiabellinia         | Vannellida          | Protosteliopsis     |
| 24 | ASV12  | 0.0361605107159143  | 3W_11  | Eukaryota | Opisthokonta | Holozoa       | Metazoa_(Animalia)  | Tetrapoda           | Mammalia            |
| 25 | ASV56  | 0.0255813953488372  | 3B_8   | Eukaryota | Opisthokonta | Nuclemycea    | Fungi               | Mrakiaceae          | Itersonilia         |
| 26 | ASV28  | 0.0215686274509804  | 3W_11  | Eukaryota | SAR          | Alveolata     | Ciliophora          | Colpodida           | Bromeliotrix        |
| 27 | ASV71  | 0.0209758321933425  | 3B_11  | Eukaryota | Amoebozoa    | Discosea      | Fiabellinia         | Vannellida          | Vannella            |
| 28 | ASV6   | 0.0185134518923849  | 3W_8   | Eukaryota | Amoebozoa    | Discosea      | Longamoebia         | Centramoebida       | Acanthamoeba        |
| 29 | ASV38  | 0.0176014591883265  | 3W_8   | Eukaryota | Opisthokonta | Holozoa       | Metazoa_(Animalia)  | Enoplia             | Enoplida            |
| 30 | ASV12  | 0.0172822617419061  | 3B_8   | Eukaryota | Opisthokonta | Holozoa       | Metazoa_(Animalia)  | Tetrapoda           | Mammalia            |
| 31 | ASV9   | 0.0153214774281806  | 3W_8   | Eukaryota | SAR          | Rhizaria      | Cercozoa            | Incertae_Sedis      | Gymnophrys          |
| 32 | ASV52  | 0.014500683994528   | 3B_11  | Eukaryota | SAR          | Alveolata     | Ciliophora          | Colpodea            | Colpodida           |
| 33 | ASV33  | 0.0136342909256726  | 3W_11  | Eukaryota | Amoebozoa    | Tubulinea     | Arcellinida         | Phryganellina       | Cryptodiffugia      |
| 34 | ASV8   | 0.0131782945736434  | 3B_11  | Eukaryota | Opisthokonta | Holozoa       | Metazoa_(Animalia)  | Monogononta         | Ploimida            |
| 35 | ASV21  | 0.0130870953032376  | 3W_11  | Eukaryota | SAR          | Stramenopiles | Ochrophyta          | Ochromonadales      | Paraphysomonas      |
| 36 | ASV48  | 0.0125398996808026  | 3W_8   | Eukaryota | Opisthokonta | Nuclemycea    | Fungi               | Sporidiobolaceae    | Sporobolomyces      |
| 37 | ASV70  | 0.0111263109895121  | 3W_11  | Eukaryota | SAR          | Alveolata     | Ciliophora          | Nassophorea         | Leptopharynx        |
| 38 | ASV46  | 0.00930232558139535 | 3W_11  | Eukaryota | SAR          | Alveolata     | Ciliophora          | Hypotrichia         | Hemiuromoida        |
| 39 | ASV56  | 0.00852713178294574 | 3B_11  | Eukaryota | Opisthokonta | Nuclemycea    | Fungi               | Mrakiaceae          | Itersonilia         |
| 40 | ASV244 | 0.00807113543091655 | 3W_8   | Eukaryota | Opisthokonta | Nuclemycea    | Fungi               | Corticaceae         | Hyphodontia         |
| 41 | ASV59  | 0.00747834017327861 | 3W_11  | Eukaryota | Opisthokonta | Nuclemycea    | Fungi               | Aspergillaceae      | Penicillium         |
| 42 | ASV71  | 0.00706794345645235 | 3W_8   | Eukaryota | Amoebozoa    | Discosea      | Fiabellinia         | Vannellida          | Vannella            |
| 43 | ASV114 | 0.00661194710442316 | 3B_11  | Eukaryota | Opisthokonta | Nuclemycea    | Fungi               | Aspergillaceae      | Aspergillus         |
| 44 | ASV7   | 0.00652074783401733 | 3W_8   | Eukaryota | Excavata     | Discoba       | Discicristata       | Neobodonida         | Neobodo             |
| 45 | ASV57  | 0.00638394892840857 | 3W_11  | Eukaryota | Amoebozoa    | Mycamoeba     | Mycamoeba_gemmipara | Mycamoeba_gemmipara | Mycamoeba_gemmipara |
| 46 | ASV61  | 0.00538075695394437 | 3W_11  | Eukaryota | SAR          | Rhizaria      | Cercozoa            | Cercomonadidae      | Cavermomonas        |
| 47 | ASV26  | 0.0051527587792978  | 3B_11  | Eukaryota | SAR          | Stramenopiles | Ochrophyta          | Eustigmatales       | Eustigmatos         |
| 48 | ASV79  | 0.00492476060191518 | 3W_11  | Eukaryota | Amoebozoa    | Discosea      | Fiabellinia         | Dactylopodida       | Korotnevela         |
| 49 | ASV96  | 0.00492476060191518 | 3W_8   | Eukaryota | Opisthokonta | Nuclemycea    | Fungi               | Incertae_Sedis      | Candida             |
| 50 | ASV76  | 0.00474236206110351 | 3W_11  | Eukaryota | SAR          | Rhizaria      | Cercozoa            | Thaumatomonadidae   | Thaumatomonas       |
| 51 | ASV152 | 0.00460556315549476 | 3W_11  | Eukaryota | SAR          | Rhizaria      | Cercozoa            | Cercomonadidae      | Cercomonas          |
| 52 | ASV8   | 0.004468764249886   | 3B_8   | Eukaryota | Opisthokonta | Holozoa       | Metazoa_(Animalia)  | Monogononta         | Ploimida            |
| 53 | ASV78  | 0.00442316461468308 | 3W_11  | Eukaryota | SAR          | Stramenopiles | Ochrophyta          | Chromulinales       | JBNA46              |
| 54 | ASV33  | 0.00433196534427725 | 3B_11  | Eukaryota | Amoebozoa    | Tubulinea     | Arcellinida         | Phryganellina       | Cryptodiffugia      |
| 55 | ASV9   | 0.00419516643866849 | 3B_8   | Eukaryota | SAR          | Rhizaria      | Cercozoa            | Incertae_Sedis      | Gymnophrys          |
| 56 | ASV109 | 0.00401276789785682 | 3W_11  | Eukaryota | SAR          | Rhizaria      | Cercozoa            | Thecofilosea        | uncultured          |
| 57 | ASV89  | 0.00401276789785682 | 3W_11  | Eukaryota | SAR          | Alveolata     | Ciliophora          | Hypotrichia         | Anteholosticha      |
| 58 | ASV26  | 0.00364797081623347 | 3B_8   | Eukaryota | SAR          | Stramenopiles | Ochrophyta          | Eustigmatales       | Eustigmatos         |
| 59 | ASV68  | 0.00360237118103055 | 3W_11  | Eukaryota | Opisthokonta | Nuclemycea    | Fungi               | Cladosporiaceae     | Cladosporium        |
| 60 | ASV27  | 0.00355677154582763 | 3B_11  | Eukaryota | Amoebozoa    | Discosea      | Fiabellinia         | Vannellida          | Protosteliopsis     |
| 61 | ASV26  | 0.00332877336981304 | 3W_11  | Eukaryota | SAR          | Stramenopiles | Ochrophyta          | Eustigmatales       | Eustigmatos         |
| 62 | ASV59  | 0.00328317373461012 | 3B_11  | Eukaryota | Opisthokonta | Nuclemycea    | Fungi               | Aspergillaceae      | Penicillium         |

|     |        |                      |         |           |                |                |                           |                      |                            |
|-----|--------|----------------------|---------|-----------|----------------|----------------|---------------------------|----------------------|----------------------------|
| 63  | ASV132 | 0.00300957592339261  | 3W_8    | Eukaryota | Opisthokonta   | Holozoa        | Metazoa_(Animalia)        | Chromadorea          | Rhabditiida                |
| 64  | ASV101 | 0.00296397628818969  | 3W_11   | Eukaryota | Opisthokonta   | Holozoa        | Metazoa_(Animalia)        | Oligochaeta          | Haplotaxida                |
| 65  | ASV68  | 0.00296397628818969  | 3B_11   | Eukaryota | Opisthokonta   | Nuclemycea     | Fungi                     | Cladosporiaceae      | Cladosporium               |
| 66  | ASV101 | 0.00291837665298678  | 3B_8    | Eukaryota | Opisthokonta   | Holozoa        | Metazoa_(Animalia)        | Oligochaeta          | Haplotaxida                |
| 67  | ASV11  | 0.00291837665298678  | 3B_8    | Eukaryota | Opisthokonta   | Holozoa        | Metazoa_(Animalia)        | Chromadorea          | Monhysterida               |
| 68  | ASV137 | 0.00282717738258094  | 3W_8    | Eukaryota | Opisthokonta   | Nuclemycea     | Fungi                     | Cystofilobasidiaceae | Cystofilobasidium          |
| 69  | ASV15  | 0.00282717738258094  | 3B_11   | Eukaryota | SAR            | Rhizaria       | Cercozoa                  | Rhizaspidae          | Rhogostoma                 |
| 70  | ASV328 | 0.0027359781121751   | 3B_8    | Eukaryota | Opisthokonta   | Nuclemycea     | Fungi                     | Bullerbasidiaceae    | Dioszegia                  |
| 71  | ASV125 | 0.00250797993616051  | 3W_11   | Eukaryota | Excavata       | Discoba        | Discicristata             | Neobodonida          | Rhynchomonas               |
| 72  | ASV6   | 0.00246238030095759  | 3W_11   | Eukaryota | Amoebozoa      | Discosea       | Longamoebia               | Centramoebida        | Acanthamoeba               |
| 73  | ASV119 | 0.00237118103055176  | 3W_11   | Eukaryota | Opisthokonta   | Nuclemycea     | Fungi                     | Phaeosphaeriaceae    | Ophiosphaerella            |
| 74  | ASV141 | 0.002234382124943    | 3W_11   | Eukaryota | SAR            | Rhizaria       | Cercozoa                  | Peregriniidae        | Gyromitus                  |
| 75  | ASV142 | 0.002234382124943    | 3W_11   | Eukaryota | Opisthokonta   | Nuclemycea     | Fungi                     | Cucurbitariaceae     | uncultured                 |
| 76  | ASV138 | 0.00218878248974008  | 3W_11   | Eukaryota | Opisthokonta   | Nuclemycea     | Fungi                     | Incertae_Sedis       | Tetracladium               |
| 77  | ASV59  | 0.00218878248974008  | 3B_8    | Eukaryota | Opisthokonta   | Nuclemycea     | Fungi                     | Aspergillaceae       | Penicillium                |
| 78  | ASV124 | 0.00200638394892841  | 3B_11   | Eukaryota | Opisthokonta   | Nuclemycea     | Fungi                     | Trichosporonaceae    | Trichosporon               |
| 79  | ASV127 | 0.00200638394892841  | 3W_11   | Eukaryota | Opisthokonta   | Nuclemycea     | Fungi                     | Incertae_Sedis       | Trametes                   |
| 80  | ASV147 | 0.00196078431372549  | 3W_11   | Eukaryota | Opisthokonta   | Nuclemycea     | Fungi                     | Hyaloscyphaceae      | Calycina                   |
| 81  | ASV16  | 0.00191518467852257  | 3B_8    | Eukaryota | SAR            | Stramenopiles  | Ochrophyta                | Chromulinales        | Spumella                   |
| 82  | ASV340 | 0.00191518467852257  | 3B_8    | Eukaryota | Opisthokonta   | Nuclemycea     | Fungi                     | Schizophyllaceae     | Chondrostereum             |
| 83  | ASV7   | 0.00191518467852257  | 3W_11   | Eukaryota | Excavata       | Discoba        | Discicristata             | Neobodonida          | Neobodo                    |
| 84  | ASV11  | 0.00186958504331965  | 3W_11   | Eukaryota | Opisthokonta   | Holozoa        | Metazoa_(Animalia)        | Chromadorea          | Monhysterida               |
| 85  | ASV148 | 0.00177838577291382  | 3W_11   | Eukaryota | SAR            | Rhizaria       | Cercozoa                  | Euglyphidae          | Euglypha                   |
| 86  | ASV196 | 0.00159598723210214  | 3W_11   | Eukaryota | Opisthokonta   | Nuclemycea     | Nucleariidae_and_Fonticul | Nucleariidae         | Nuclearia                  |
| 87  | ASV68  | 0.00159598723210214  | 3B_8    | Eukaryota | Opisthokonta   | Nuclemycea     | Fungi                     | Cladosporiaceae      | Cladosporium               |
| 88  | ASV119 | 0.00155038759689922  | 3B_8    | Eukaryota | Opisthokonta   | Nuclemycea     | Fungi                     | Phaeosphaeriaceae    | Ophiosphaerella            |
| 89  | ASV372 | 0.00155038759689922  | 3B_8    | Eukaryota | Archaeplastida | Chloroplastida | Charophyta                | Solanales            | Ipomoea                    |
| 90  | ASV184 | 0.00150478796169631  | 3B_8    | Eukaryota | Opisthokonta   | Nuclemycea     | Fungi                     | Incertae_Sedis       | Wallemia                   |
| 91  | ASV114 | 0.00145918832649339  | 3W_11   | Eukaryota | Opisthokonta   | Nuclemycea     | Fungi                     | Aspergillaceae       | Aspergillus                |
| 92  | ASV124 | 0.00132238942088463  | 3W_11   | Eukaryota | Opisthokonta   | Nuclemycea     | Fungi                     | Trichosporonaceae    | Trichosporon               |
| 93  | ASV185 | 0.00132238942088463  | 3W_11   | Eukaryota | SAR            | Alveolata      | Apicomplexa               | Cryptosporida        | Cryptosporidium            |
| 94  | ASV189 | 0.00132238942088463  | 3W_11   | Eukaryota | Opisthokonta   | Nuclemycea     | Fungi                     | Ascobolaceae         | Saccobolus                 |
| 95  | ASV256 | 0.00132238942088463  | 3W_11   | Eukaryota | Excavata       | Discoba        | Discicristata             | Heteronematina       | Petalomonas                |
| 96  | ASV368 | 0.00127678978568171  | 3B_8    | Eukaryota | Opisthokonta   | Nuclemycea     | Fungi                     | Psathyrellaceae      | Psathyrella                |
| 97  | ASV11  | 0.00118559051527588  | 3B_11   | Eukaryota | Opisthokonta   | Holozoa        | Metazoa_(Animalia)        | Chromadorea          | Monhysterida               |
| 98  | ASV380 | 0.00109439124487004  | 3B_8    | Eukaryota | Opisthokonta   | Nuclemycea     | Fungi                     | Debaryomycetaceae    | Candida-Lodderomyces_clade |
| 99  | ASV127 | 0.00104879160966712  | 3B_8    | Eukaryota | Opisthokonta   | Nuclemycea     | Fungi                     | Incertae_Sedis       | Trametes                   |
| 100 | ASV22  | 0.0010031919744642   | 3B_8    | Eukaryota | Opisthokonta   | Holozoa        | Metazoa_(Animalia)        | Chromadorea          | Tylenchida                 |
| 101 | ASV361 | 0.0010031919744642   | 3B_8    | Eukaryota | Opisthokonta   | Nuclemycea     | Fungi                     | Phanerochaetaceae    | Phanerochaete              |
| 102 | ASV362 | 0.000957592339261286 | 3B_8    | Eukaryota | Archaeplastida | Chloroplastida | Charophyta                | Brassicales          | Brassica                   |
| 103 | ASV369 | 0.000957592339261286 | 3B_8    | Eukaryota | Opisthokonta   | Nuclemycea     | Fungi                     | Pleosporaceae        | Alternaria                 |
| 104 | ASV375 | 0.000957592339261286 | 3B_8    | Eukaryota | Opisthokonta   | Nuclemycea     | Fungi                     | Trichomeriaceae      | Bradomyces                 |
| 105 | ASV223 | 0.000775193798449612 | 3W_11   | Eukaryota | Opisthokonta   | Holozoa        | Metazoa_(Animalia)        | Arachnida            | Acari                      |
| 106 | ASV247 | 0.000729594163246694 | 3W_11   | Eukaryota | SAR            | Stramenopiles  | Labyrinthulomycetes       | Sorodiplophrys       | uncultured_eukaryote       |
| 107 | ASV259 | 0.000592795257637939 | 3W_11   | Eukaryota | SAR            | Rhizaria       | Cercozoa                  | Cercomonadidae       | Eocercomonas               |
| 108 | ASV323 | 0.000455996352029184 | 3W_11   | Eukaryota | SAR            | Rhizaria       | Cercozoa                  | Glissomonadida       | Heteromita                 |
| 109 | ASV395 | 0.000455996352029184 | 3B_8    | Eukaryota | Opisthokonta   | Nuclemycea     | Fungi                     | Didymellaceae        | Epicoccum                  |
| 110 | ASV334 | 0.00027359781121751  | 3W_11   | Eukaryota | Amoebozoa      | uncultured     | uncultured_eukaryote      | uncultured_eukaryote | uncultured_eukaryote       |
| 111 | ASV399 | 0.00027359781121751  | 3B_8    | Eukaryota | SAR            | Alveolata      | Ciliophora                | Hypotrichia          | Sterkiella                 |
| 112 | ASV114 | 0.000227998176014592 | 3B_8    | Eukaryota | Opisthokonta   | Nuclemycea     | Fungi                     | Aspergillaceae       | Aspergillus                |
| 113 | ASV324 | 0.000227998176014592 | 3W_11   | Eukaryota | SAR            | Rhizaria       | Cercozoa                  | Cercomonadidae       | Paracercomonas             |
| 114 | ASV345 | 0.000227998176014592 | 3W_11   | Eukaryota | Amoebozoa      | Tubulinea      | Arcellinida               | Echinamoebida        | Vermamoeba                 |
| 115 | ASV38  | 0.000227998176014592 | 3W_11   | Eukaryota | Opisthokonta   | Holozoa        | Metazoa_(Animalia)        | Enoplia              | Enopliida                  |
| 116 | ASV101 | 0.000136798905608755 | 3B_11   | Eukaryota | Opisthokonta   | Holozoa        | Metazoa_(Animalia)        | Oligochaeta          | Haplotaxida                |
| 117 | ASV376 | 0.000136798905608755 | 3W_11   | Eukaryota | Amoebozoa      | Discosea       | Flabellinia               | Dactylopodida        | Pseudoparamoeba            |
| 118 | ASV400 | 4.55996352029184e-05 | 3W_11   | Eukaryota | Amoebozoa      | Tubulinea      | Euamoebida                | Ptolemba_bulliensis  | Ptolemba_bulliensis        |
| 119 | ASV101 |                      | 0 3W_8  | Eukaryota | Opisthokonta   | Holozoa        | Metazoa_(Animalia)        | Oligochaeta          | Haplotaxida                |
| 120 | ASV109 |                      | 0 3W_8  | Eukaryota | SAR            | Rhizaria       | Cercozoa                  | Thecofilosea         | uncultured                 |
| 121 | ASV109 |                      | 0 3B_11 | Eukaryota | SAR            | Rhizaria       | Cercozoa                  | Thecofilosea         | uncultured                 |
| 122 | ASV109 |                      | 0 3B_8  | Eukaryota | SAR            | Rhizaria       | Cercozoa                  | Thecofilosea         | uncultured                 |
| 123 | ASV114 |                      | 0 3W_8  | Eukaryota | Opisthokonta   | Nuclemycea     | Fungi                     | Aspergillaceae       | Aspergillus                |
| 124 | ASV119 |                      | 0 3B_11 | Eukaryota | Opisthokonta   | Nuclemycea     | Fungi                     | Phaeosphaeriaceae    | Ophiosphaerella            |
| 125 | ASV119 |                      | 0 3W_8  | Eukaryota | Opisthokonta   | Nuclemycea     | Fungi                     | Phaeosphaeriaceae    | Ophiosphaerella            |
| 126 | ASV124 |                      | 0 3B_8  | Eukaryota | Opisthokonta   | Nuclemycea     | Fungi                     | Trichosporonaceae    | Trichosporon               |

|     |        |   |       |           |              |               |                           |                     |                      |
|-----|--------|---|-------|-----------|--------------|---------------|---------------------------|---------------------|----------------------|
| 127 | ASV124 | 0 | 3W_8  | Eukaryota | Opisthokonta | Nuclemycea    | Fungi                     | Trichosporonaceae   | Trichosporon         |
| 128 | ASV125 | 0 | 3W_8  | Eukaryota | Excavata     | Discoba       | Discicristata             | Neobodonida         | Rhynchomonas         |
| 129 | ASV125 | 0 | 3B_8  | Eukaryota | Excavata     | Discoba       | Discicristata             | Neobodonida         | Rhynchomonas         |
| 130 | ASV125 | 0 | 3B_11 | Eukaryota | Excavata     | Discoba       | Discicristata             | Neobodonida         | Rhynchomonas         |
| 131 | ASV127 | 0 | 3B_11 | Eukaryota | Opisthokonta | Nuclemycea    | Fungi                     | Incertae_Sedis      | Trametes             |
| 132 | ASV127 | 0 | 3W_8  | Eukaryota | Opisthokonta | Nuclemycea    | Fungi                     | Incertae_Sedis      | Trametes             |
| 133 | ASV132 | 0 | 3B_8  | Eukaryota | Opisthokonta | Holozoa       | Metazoa_(Animalia)        | Chromadorea         | Rhabditida           |
| 134 | ASV132 | 0 | 3B_11 | Eukaryota | Opisthokonta | Holozoa       | Metazoa_(Animalia)        | Chromadorea         | Rhabditida           |
| 135 | ASV132 | 0 | 3W_11 | Eukaryota | Opisthokonta | Holozoa       | Metazoa_(Animalia)        | Chromadorea         | Rhabditida           |
| 136 | ASV137 | 0 | 3B_8  | Eukaryota | Opisthokonta | Nuclemycea    | Fungi                     | Cystoflobasidiaceae | Cystoflobasidium     |
| 137 | ASV137 | 0 | 3B_11 | Eukaryota | Opisthokonta | Nuclemycea    | Fungi                     | Cystoflobasidiaceae | Cystoflobasidium     |
| 138 | ASV137 | 0 | 3W_11 | Eukaryota | Opisthokonta | Nuclemycea    | Fungi                     | Cystoflobasidiaceae | Cystoflobasidium     |
| 139 | ASV138 | 0 | 3B_11 | Eukaryota | Opisthokonta | Nuclemycea    | Fungi                     | Incertae_Sedis      | Tetracladium         |
| 140 | ASV138 | 0 | 3W_8  | Eukaryota | Opisthokonta | Nuclemycea    | Fungi                     | Incertae_Sedis      | Tetracladium         |
| 141 | ASV138 | 0 | 3B_8  | Eukaryota | Opisthokonta | Nuclemycea    | Fungi                     | Incertae_Sedis      | Tetracladium         |
| 142 | ASV141 | 0 | 3B_8  | Eukaryota | SAR          | Rhizaria      | Cercozoa                  | Peregriniidae       | Gyromitus            |
| 143 | ASV141 | 0 | 3B_8  | Eukaryota | SAR          | Rhizaria      | Cercozoa                  | Peregriniidae       | Gyromitus            |
| 144 | ASV141 | 0 | 3B_11 | Eukaryota | SAR          | Rhizaria      | Cercozoa                  | Peregriniidae       | Gyromitus            |
| 145 | ASV142 | 0 | 3B_11 | Eukaryota | Opisthokonta | Nuclemycea    | Fungi                     | Cucurbitariaceae    | uncultured           |
| 146 | ASV142 | 0 | 3B_8  | Eukaryota | Opisthokonta | Nuclemycea    | Fungi                     | Cucurbitariaceae    | uncultured           |
| 147 | ASV142 | 0 | 3W_8  | Eukaryota | Opisthokonta | Nuclemycea    | Fungi                     | Cucurbitariaceae    | uncultured           |
| 148 | ASV147 | 0 | 3B_8  | Eukaryota | Opisthokonta | Nuclemycea    | Fungi                     | Hyaloscyphaceae     | Calycina             |
| 149 | ASV147 | 0 | 3W_8  | Eukaryota | Opisthokonta | Nuclemycea    | Fungi                     | Hyaloscyphaceae     | Calycina             |
| 150 | ASV147 | 0 | 3B_11 | Eukaryota | Opisthokonta | Nuclemycea    | Fungi                     | Hyaloscyphaceae     | Calycina             |
| 151 | ASV148 | 0 | 3B_8  | Eukaryota | SAR          | Rhizaria      | Cercozoa                  | Euglyphidae         | Euglypha             |
| 152 | ASV148 | 0 | 3W_8  | Eukaryota | SAR          | Rhizaria      | Cercozoa                  | Euglyphidae         | Euglypha             |
| 153 | ASV148 | 0 | 3B_11 | Eukaryota | SAR          | Rhizaria      | Cercozoa                  | Euglyphidae         | Euglypha             |
| 154 | ASV15  | 0 | 3B_8  | Eukaryota | SAR          | Rhizaria      | Cercozoa                  | Rhizaspidiidae      | Rhogostoma           |
| 155 | ASV15  | 0 | 3W_8  | Eukaryota | SAR          | Rhizaria      | Cercozoa                  | Rhizaspidiidae      | Rhogostoma           |
| 156 | ASV152 | 0 | 3B_8  | Eukaryota | SAR          | Rhizaria      | Cercozoa                  | Cercomonadidae      | Cercomonas           |
| 157 | ASV152 | 0 | 3B_11 | Eukaryota | SAR          | Rhizaria      | Cercozoa                  | Cercomonadidae      | Cercomonas           |
| 158 | ASV152 | 0 | 3W_8  | Eukaryota | SAR          | Rhizaria      | Cercozoa                  | Cercomonadidae      | Cercomonas           |
| 159 | ASV16  | 0 | 3B_11 | Eukaryota | SAR          | Stramenopiles | Ochrophyta                | Chromulinales       | Spumella             |
| 160 | ASV16  | 0 | 3W_8  | Eukaryota | SAR          | Stramenopiles | Ochrophyta                | Chromulinales       | Spumella             |
| 161 | ASV184 | 0 | 3W_11 | Eukaryota | Opisthokonta | Nuclemycea    | Fungi                     | Incertae_Sedis      | Walleimia            |
| 162 | ASV184 | 0 | 3B_11 | Eukaryota | Opisthokonta | Nuclemycea    | Fungi                     | Incertae_Sedis      | Walleimia            |
| 163 | ASV184 | 0 | 3B_8  | Eukaryota | Opisthokonta | Nuclemycea    | Fungi                     | Incertae_Sedis      | Walleimia            |
| 164 | ASV185 | 0 | 3W_8  | Eukaryota | SAR          | Alveolata     | Apicomplexa               | Cryptosporida       | Cryptosporidium      |
| 165 | ASV185 | 0 | 3B_11 | Eukaryota | SAR          | Alveolata     | Apicomplexa               | Cryptosporida       | Cryptosporidium      |
| 166 | ASV185 | 0 | 3B_8  | Eukaryota | SAR          | Alveolata     | Apicomplexa               | Cryptosporida       | Cryptosporidium      |
| 167 | ASV189 | 0 | 3W_8  | Eukaryota | Opisthokonta | Nuclemycea    | Fungi                     | Ascobolaceae        | Saccobolus           |
| 168 | ASV189 | 0 | 3B_8  | Eukaryota | Opisthokonta | Nuclemycea    | Fungi                     | Ascobolaceae        | Saccobolus           |
| 169 | ASV189 | 0 | 3B_11 | Eukaryota | Opisthokonta | Nuclemycea    | Fungi                     | Ascobolaceae        | Saccobolus           |
| 170 | ASV196 | 0 | 3W_8  | Eukaryota | Opisthokonta | Nuclemycea    | Nucleariidae_and_Fonticul | Nucleariidae        | Nuclearia            |
| 171 | ASV196 | 0 | 3B_8  | Eukaryota | Opisthokonta | Nuclemycea    | Nucleariidae_and_Fonticul | Nucleariidae        | Nuclearia            |
| 172 | ASV196 | 0 | 3B_11 | Eukaryota | Opisthokonta | Nuclemycea    | Nucleariidae_and_Fonticul | Nucleariidae        | Nuclearia            |
| 173 | ASV20  | 0 | 3B_11 | Eukaryota | SAR          | Alveolata     | Ciliophora                | Euplotia            | Euplotes             |
| 174 | ASV20  | 0 | 3W_8  | Eukaryota | SAR          | Alveolata     | Ciliophora                | Euplotia            | Euplotes             |
| 175 | ASV20  | 0 | 3B_8  | Eukaryota | SAR          | Alveolata     | Ciliophora                | Euplotia            | Euplotes             |
| 176 | ASV21  | 0 | 3W_8  | Eukaryota | SAR          | Stramenopiles | Ochrophyta                | Ochromonadales      | Paraphysomonas       |
| 177 | ASV22  | 0 | 3W_11 | Eukaryota | Opisthokonta | Holozoa       | Metazoa_(Animalia)        | Chromadorea         | Tylenchida           |
| 178 | ASV22  | 0 | 3B_11 | Eukaryota | Opisthokonta | Holozoa       | Metazoa_(Animalia)        | Chromadorea         | Tylenchida           |
| 179 | ASV223 | 0 | 3W_8  | Eukaryota | Opisthokonta | Holozoa       | Metazoa_(Animalia)        | Arachnida           | Acari                |
| 180 | ASV223 | 0 | 3B_8  | Eukaryota | Opisthokonta | Holozoa       | Metazoa_(Animalia)        | Arachnida           | Acari                |
| 181 | ASV223 | 0 | 3B_11 | Eukaryota | Opisthokonta | Holozoa       | Metazoa_(Animalia)        | Arachnida           | Acari                |
| 182 | ASV244 | 0 | 3W_8  | Eukaryota | Opisthokonta | Nuclemycea    | Fungi                     | Corticaceae         | Hyphodontia          |
| 183 | ASV244 | 0 | 3W_11 | Eukaryota | Opisthokonta | Nuclemycea    | Fungi                     | Corticaceae         | Hyphodontia          |
| 184 | ASV244 | 0 | 3B_11 | Eukaryota | Opisthokonta | Nuclemycea    | Fungi                     | Corticaceae         | Hyphodontia          |
| 185 | ASV247 | 0 | 3W_8  | Eukaryota | SAR          | Stramenopiles | Labyrinthulomycetes       | Sorodiplophrys      | uncultured_eukaryote |
| 186 | ASV247 | 0 | 3B_8  | Eukaryota | SAR          | Stramenopiles | Labyrinthulomycetes       | Sorodiplophrys      | uncultured_eukaryote |
| 187 | ASV247 | 0 | 3B_11 | Eukaryota | SAR          | Stramenopiles | Labyrinthulomycetes       | Sorodiplophrys      | uncultured_eukaryote |
| 188 | ASV256 | 0 | 3W_8  | Eukaryota | Excavata     | Discoba       | Discicristata             | Heteronematina      | Petalomonas          |
| 189 | ASV256 | 0 | 3B_8  | Eukaryota | Excavata     | Discoba       | Discicristata             | Heteronematina      | Petalomonas          |
| 190 | ASV256 | 0 | 3B_11 | Eukaryota | Excavata     | Discoba       | Discicristata             | Heteronematina      | Petalomonas          |

|     |        |   |       |           |                |                |                      |                      |                            |
|-----|--------|---|-------|-----------|----------------|----------------|----------------------|----------------------|----------------------------|
| 191 | ASV259 | 0 | 3W_8  | Eukaryota | SAR            | Rhizaria       | Cercozoa             | Cercomonadidae       | Eocercomonas               |
| 192 | ASV259 | 0 | 3B_8  | Eukaryota | SAR            | Rhizaria       | Cercozoa             | Cercomonadidae       | Eocercomonas               |
| 193 | ASV259 | 0 | 3B_11 | Eukaryota | SAR            | Rhizaria       | Cercozoa             | Cercomonadidae       | Eocercomonas               |
| 194 | ASV27  | 0 | 3W_8  | Eukaryota | Amoebozoa      | Discosea       | Flabellinia          | Vannellida           | Protosteliopsis            |
| 195 | ASV27  | 0 | 3B_8  | Eukaryota | Amoebozoa      | Discosea       | Flabellinia          | Vannellida           | Protosteliopsis            |
| 196 | ASV28  | 0 | 3W_8  | Eukaryota | SAR            | Alveolata      | Ciliophora           | Colpodida            | Bromeliothrix              |
| 197 | ASV28  | 0 | 3B_8  | Eukaryota | SAR            | Alveolata      | Ciliophora           | Colpodida            | Bromeliothrix              |
| 198 | ASV28  | 0 | 3B_11 | Eukaryota | SAR            | Alveolata      | Ciliophora           | Colpodida            | Bromeliothrix              |
| 199 | ASV29  | 0 | 3W_8  | Eukaryota | Opisthokonta   | Holozoa        | Metazoa_(Animalia)   | Chromadorea          | Araeolaimida               |
| 200 | ASV29  | 0 | 3W_11 | Eukaryota | Opisthokonta   | Holozoa        | Metazoa_(Animalia)   | Chromadorea          | Araeolaimida               |
| 201 | ASV29  | 0 | 3B_8  | Eukaryota | Opisthokonta   | Holozoa        | Metazoa_(Animalia)   | Chromadorea          | Araeolaimida               |
| 202 | ASV323 | 0 | 3W_8  | Eukaryota | SAR            | Rhizaria       | Cercozoa             | Glissomonadida       | Heteromita                 |
| 203 | ASV323 | 0 | 3B_8  | Eukaryota | SAR            | Rhizaria       | Cercozoa             | Glissomonadida       | Heteromita                 |
| 204 | ASV323 | 0 | 3B_11 | Eukaryota | SAR            | Rhizaria       | Cercozoa             | Glissomonadida       | Heteromita                 |
| 205 | ASV324 | 0 | 3W_8  | Eukaryota | SAR            | Rhizaria       | Cercozoa             | Cercomonadidae       | Paracercomonas             |
| 206 | ASV324 | 0 | 3B_8  | Eukaryota | SAR            | Rhizaria       | Cercozoa             | Cercomonadidae       | Paracercomonas             |
| 207 | ASV324 | 0 | 3B_11 | Eukaryota | SAR            | Rhizaria       | Cercozoa             | Cercomonadidae       | Paracercomonas             |
| 208 | ASV328 | 0 | 3W_8  | Eukaryota | Opisthokonta   | Nuclemycea     | Fungi                | Bulleribasidiaceae   | Dioszegia                  |
| 209 | ASV328 | 0 | 3W_11 | Eukaryota | Opisthokonta   | Nuclemycea     | Fungi                | Bulleribasidiaceae   | Dioszegia                  |
| 210 | ASV328 | 0 | 3B_11 | Eukaryota | Opisthokonta   | Nuclemycea     | Fungi                | Bulleribasidiaceae   | Dioszegia                  |
| 211 | ASV33  | 0 | 3W_8  | Eukaryota | Amoebozoa      | Tubulinea      | Arcellinida          | Phryganellina        | Cryptodiffugia             |
| 212 | ASV33  | 0 | 3B_8  | Eukaryota | Amoebozoa      | Tubulinea      | Arcellinida          | Phryganellina        | Cryptodiffugia             |
| 213 | ASV334 | 0 | 3W_8  | Eukaryota | Amoebozoa      | uncultured     | uncultured_eukaryote | uncultured_eukaryote | uncultured_eukaryote       |
| 214 | ASV334 | 0 | 3B_8  | Eukaryota | Amoebozoa      | uncultured     | uncultured_eukaryote | uncultured_eukaryote | uncultured_eukaryote       |
| 215 | ASV334 | 0 | 3B_11 | Eukaryota | Amoebozoa      | uncultured     | uncultured_eukaryote | uncultured_eukaryote | uncultured_eukaryote       |
| 216 | ASV340 | 0 | 3W_8  | Eukaryota | Opisthokonta   | Nuclemycea     | Fungi                | Schizophyllaceae     | Chondrostereum             |
| 217 | ASV340 | 0 | 3W_11 | Eukaryota | Opisthokonta   | Nuclemycea     | Fungi                | Schizophyllaceae     | Chondrostereum             |
| 218 | ASV340 | 0 | 3B_11 | Eukaryota | Opisthokonta   | Nuclemycea     | Fungi                | Schizophyllaceae     | Chondrostereum             |
| 219 | ASV345 | 0 | 3W_8  | Eukaryota | Amoebozoa      | Tubulinea      | Arcellinida          | Echinamoebida        | Vermamoeba                 |
| 220 | ASV345 | 0 | 3B_11 | Eukaryota | Amoebozoa      | Tubulinea      | Arcellinida          | Echinamoebida        | Vermamoeba                 |
| 221 | ASV345 | 0 | 3B_8  | Eukaryota | Amoebozoa      | Tubulinea      | Arcellinida          | Echinamoebida        | Vermamoeba                 |
| 222 | ASV361 | 0 | 3W_11 | Eukaryota | Opisthokonta   | Nuclemycea     | Fungi                | Phanerochaetaceae    | Phanerochaete              |
| 223 | ASV361 | 0 | 3W_8  | Eukaryota | Opisthokonta   | Nuclemycea     | Fungi                | Phanerochaetaceae    | Phanerochaete              |
| 224 | ASV361 | 0 | 3B_11 | Eukaryota | Opisthokonta   | Nuclemycea     | Fungi                | Phanerochaetaceae    | Phanerochaete              |
| 225 | ASV362 | 0 | 3W_11 | Eukaryota | Archaeplastida | Chloroplastida | Charophyta           | Brassicales          | Brassica                   |
| 226 | ASV362 | 0 | 3B_11 | Eukaryota | Archaeplastida | Chloroplastida | Charophyta           | Brassicales          | Brassica                   |
| 227 | ASV362 | 0 | 3W_8  | Eukaryota | Archaeplastida | Chloroplastida | Charophyta           | Brassicales          | Brassica                   |
| 228 | ASV368 | 0 | 3B_11 | Eukaryota | Opisthokonta   | Nuclemycea     | Fungi                | Psathyrellaceae      | Psathyrella                |
| 229 | ASV368 | 0 | 3W_8  | Eukaryota | Opisthokonta   | Nuclemycea     | Fungi                | Psathyrellaceae      | Psathyrella                |
| 230 | ASV368 | 0 | 3W_11 | Eukaryota | Opisthokonta   | Nuclemycea     | Fungi                | Psathyrellaceae      | Psathyrella                |
| 231 | ASV369 | 0 | 3W_8  | Eukaryota | Opisthokonta   | Nuclemycea     | Fungi                | Pleosporaceae        | Alternaria                 |
| 232 | ASV369 | 0 | 3B_11 | Eukaryota | Opisthokonta   | Nuclemycea     | Fungi                | Pleosporaceae        | Alternaria                 |
| 233 | ASV369 | 0 | 3W_11 | Eukaryota | Opisthokonta   | Nuclemycea     | Fungi                | Pleosporaceae        | Alternaria                 |
| 234 | ASV372 | 0 | 3W_8  | Eukaryota | Archaeplastida | Chloroplastida | Charophyta           | Solanales            | Ipomoea                    |
| 235 | ASV372 | 0 | 3B_11 | Eukaryota | Archaeplastida | Chloroplastida | Charophyta           | Solanales            | Ipomoea                    |
| 236 | ASV372 | 0 | 3W_11 | Eukaryota | Archaeplastida | Chloroplastida | Charophyta           | Solanales            | Ipomoea                    |
| 237 | ASV375 | 0 | 3B_11 | Eukaryota | Opisthokonta   | Nuclemycea     | Fungi                | Trichomeriaceae      | Bradymyces                 |
| 238 | ASV375 | 0 | 3W_11 | Eukaryota | Opisthokonta   | Nuclemycea     | Fungi                | Trichomeriaceae      | Bradymyces                 |
| 239 | ASV375 | 0 | 3W_8  | Eukaryota | Opisthokonta   | Nuclemycea     | Fungi                | Trichomeriaceae      | Bradymyces                 |
| 240 | ASV376 | 0 | 3W_8  | Eukaryota | Amoebozoa      | Discosea       | Flabellinia          | Dactylopodida        | Pseudoparamoeba            |
| 241 | ASV376 | 0 | 3B_11 | Eukaryota | Amoebozoa      | Discosea       | Flabellinia          | Dactylopodida        | Pseudoparamoeba            |
| 242 | ASV376 | 0 | 3B_8  | Eukaryota | Amoebozoa      | Discosea       | Flabellinia          | Dactylopodida        | Pseudoparamoeba            |
| 243 | ASV38  | 0 | 3B_8  | Eukaryota | Opisthokonta   | Holozoa        | Metazoa_(Animalia)   | Enoplia              | Enoplida                   |
| 244 | ASV38  | 0 | 3B_11 | Eukaryota | Opisthokonta   | Holozoa        | Metazoa_(Animalia)   | Enoplia              | Enoplida                   |
| 245 | ASV380 | 0 | 3W_11 | Eukaryota | Opisthokonta   | Nuclemycea     | Fungi                | Debaryomycetaceae    | Candida-Lodderomyces_clade |
| 246 | ASV380 | 0 | 3B_11 | Eukaryota | Opisthokonta   | Nuclemycea     | Fungi                | Debaryomycetaceae    | Candida-Lodderomyces_clade |
| 247 | ASV380 | 0 | 3W_8  | Eukaryota | Opisthokonta   | Nuclemycea     | Fungi                | Debaryomycetaceae    | Candida-Lodderomyces_clade |
| 248 | ASV39  | 0 | 3W_8  | Eukaryota | Amoebozoa      | Discosea       | Flabellinia          | Vannellida           | BIO10-D10                  |
| 249 | ASV39  | 0 | 3B_8  | Eukaryota | Amoebozoa      | Discosea       | Flabellinia          | Vannellida           | BIO10-D10                  |
| 250 | ASV39  | 0 | 3B_11 | Eukaryota | Amoebozoa      | Discosea       | Flabellinia          | Vannellida           | BIO10-D10                  |
| 251 | ASV395 | 0 | 3B_11 | Eukaryota | Opisthokonta   | Nuclemycea     | Fungi                | Didymellaceae        | Epicoccum                  |
| 252 | ASV395 | 0 | 3W_8  | Eukaryota | Opisthokonta   | Nuclemycea     | Fungi                | Didymellaceae        | Epicoccum                  |
| 253 | ASV395 | 0 | 3W_11 | Eukaryota | Opisthokonta   | Nuclemycea     | Fungi                | Didymellaceae        | Epicoccum                  |
| 254 | ASV399 | 0 | 3B_11 | Eukaryota | SAR            | Alveolata      | Ciliophora           | Hypotrichia          | Sterkiella                 |

|     |        |   |       |           |              |               |                     |                      |                      |
|-----|--------|---|-------|-----------|--------------|---------------|---------------------|----------------------|----------------------|
| 255 | ASV399 | 0 | 3W_8  | Eukaryota | SAR          | Alveolata     | Ciliophora          | Hypotrichia          | Sterkiella           |
| 256 | ASV399 | 0 | 3W_11 | Eukaryota | SAR          | Alveolata     | Ciliophora          | Hypotrichia          | Sterkiella           |
| 257 | ASV400 | 0 | 3B_11 | Eukaryota | Amoebozoa    | Tubulinea     | Euamoebida          | Ptolemeba_bulliensis | Ptolemeba_bulliensis |
| 258 | ASV400 | 0 | 3B_8  | Eukaryota | Amoebozoa    | Tubulinea     | Euamoebida          | Ptolemeba_bulliensis | Ptolemeba_bulliensis |
| 259 | ASV400 | 0 | 3W_8  | Eukaryota | Amoebozoa    | Tubulinea     | Euamoebida          | Ptolemeba_bulliensis | Ptolemeba_bulliensis |
| 260 | ASV46  | 0 | 3W_8  | Eukaryota | SAR          | Alveolata     | Ciliophora          | Hypotrichia          | Hemiurossomoida      |
| 261 | ASV46  | 0 | 3B_8  | Eukaryota | SAR          | Alveolata     | Ciliophora          | Hypotrichia          | Hemiurossomoida      |
| 262 | ASV46  | 0 | 3B_11 | Eukaryota | SAR          | Alveolata     | Ciliophora          | Hypotrichia          | Hemiurossomoida      |
| 263 | ASV48  | 0 | 3W_11 | Eukaryota | Opisthokonta | Nucleomycea   | Fungi               | Sporidiobolaceae     | Sporobolomyces       |
| 264 | ASV48  | 0 | 3B_8  | Eukaryota | Opisthokonta | Nucleomycea   | Fungi               | Sporidiobolaceae     | Sporobolomyces       |
| 265 | ASV48  | 0 | 3B_11 | Eukaryota | Opisthokonta | Nucleomycea   | Fungi               | Sporidiobolaceae     | Sporobolomyces       |
| 266 | ASV52  | 0 | 3W_8  | Eukaryota | SAR          | Alveolata     | Ciliophora          | Colpodea             | Colpodida            |
| 267 | ASV52  | 0 | 3W_11 | Eukaryota | SAR          | Alveolata     | Ciliophora          | Colpodea             | Colpodida            |
| 268 | ASV52  | 0 | 3B_8  | Eukaryota | SAR          | Alveolata     | Ciliophora          | Colpodea             | Colpodida            |
| 269 | ASV56  | 0 | 3W_8  | Eukaryota | Opisthokonta | Nucleomycea   | Fungi               | Mrakiaceae           | Itersonilia          |
| 270 | ASV56  | 0 | 3B_11 | Eukaryota | Opisthokonta | Nucleomycea   | Fungi               | Mrakiaceae           | Itersonilia          |
| 271 | ASV57  | 0 | 3W_8  | Eukaryota | Amoebozoa    | Mycamoeba     | Mycamoeba_gemmipara | Mycamoeba_gemmipara  | Mycamoeba_gemmipara  |
| 272 | ASV57  | 0 | 3B_11 | Eukaryota | Amoebozoa    | Mycamoeba     | Mycamoeba_gemmipara | Mycamoeba_gemmipara  | Mycamoeba_gemmipara  |
| 273 | ASV57  | 0 | 3B_8  | Eukaryota | Amoebozoa    | Mycamoeba     | Mycamoeba_gemmipara | Mycamoeba_gemmipara  | Mycamoeba_gemmipara  |
| 274 | ASV59  | 0 | 3W_8  | Eukaryota | Opisthokonta | Nucleomycea   | Fungi               | Aspergillaceae       | Penicillium          |
| 275 | ASV61  | 0 | 3B_11 | Eukaryota | SAR          | Rhizaria      | Cercozoa            | Cercomonadidae       | Cavemomonas          |
| 276 | ASV61  | 0 | 3W_8  | Eukaryota | SAR          | Rhizaria      | Cercozoa            | Cercomonadidae       | Cavemomonas          |
| 277 | ASV61  | 0 | 3B_8  | Eukaryota | SAR          | Rhizaria      | Cercozoa            | Cercomonadidae       | Cavemomonas          |
| 278 | ASV68  | 0 | 3W_8  | Eukaryota | Opisthokonta | Nucleomycea   | Fungi               | Cladosporiaceae      | Cladosporium         |
| 279 | ASV70  | 0 | 3W_8  | Eukaryota | SAR          | Alveolata     | Ciliophora          | Nassophorea          | Leptopharynx         |
| 280 | ASV70  | 0 | 3B_11 | Eukaryota | SAR          | Alveolata     | Ciliophora          | Nassophorea          | Leptopharynx         |
| 281 | ASV70  | 0 | 3B_8  | Eukaryota | SAR          | Alveolata     | Ciliophora          | Nassophorea          | Leptopharynx         |
| 282 | ASV71  | 0 | 3W_11 | Eukaryota | Amoebozoa    | Discosea      | Flabellinia         | Vannellida           | Vannella             |
| 283 | ASV71  | 0 | 3B_8  | Eukaryota | Amoebozoa    | Discosea      | Flabellinia         | Vannellida           | Vannella             |
| 284 | ASV76  | 0 | 3B_11 | Eukaryota | SAR          | Rhizaria      | Cercozoa            | Thaumatomonadidae    | Thaumatomonas        |
| 285 | ASV76  | 0 | 3W_8  | Eukaryota | SAR          | Rhizaria      | Cercozoa            | Thaumatomonadidae    | Thaumatomonas        |
| 286 | ASV76  | 0 | 3B_8  | Eukaryota | SAR          | Rhizaria      | Cercozoa            | Thaumatomonadidae    | Thaumatomonas        |
| 287 | ASV78  | 0 | 3W_8  | Eukaryota | SAR          | Stramenopiles | Ochrophyta          | Chromulinales        | JBNA46               |
| 288 | ASV78  | 0 | 3B_11 | Eukaryota | SAR          | Stramenopiles | Ochrophyta          | Chromulinales        | JBNA46               |
| 289 | ASV78  | 0 | 3B_8  | Eukaryota | SAR          | Stramenopiles | Ochrophyta          | Chromulinales        | JBNA46               |
| 290 | ASV79  | 0 | 3B_11 | Eukaryota | Amoebozoa    | Discosea      | Flabellinia         | Dactylopodida        | Korotnevela          |
| 291 | ASV79  | 0 | 3B_8  | Eukaryota | Amoebozoa    | Discosea      | Flabellinia         | Dactylopodida        | Korotnevela          |
| 292 | ASV79  | 0 | 3W_8  | Eukaryota | Amoebozoa    | Discosea      | Flabellinia         | Dactylopodida        | Korotnevela          |
| 293 | ASV8   | 0 | 3W_8  | Eukaryota | Opisthokonta | Holozoa       | Metazoa_(Animalia)  | Monogononta          | Ploimida             |
| 294 | ASV89  | 0 | 3B_11 | Eukaryota | SAR          | Alveolata     | Ciliophora          | Hypotrichia          | Anteholosticha       |
| 295 | ASV89  | 0 | 3B_8  | Eukaryota | SAR          | Alveolata     | Ciliophora          | Hypotrichia          | Anteholosticha       |
| 296 | ASV89  | 0 | 3W_8  | Eukaryota | SAR          | Alveolata     | Ciliophora          | Hypotrichia          | Anteholosticha       |
| 297 | ASV9   | 0 | 3B_11 | Eukaryota | SAR          | Rhizaria      | Cercozoa            | Incertae_Sedis       | Gymnophrys           |
| 298 | ASV96  | 0 | 3B_11 | Eukaryota | Opisthokonta | Nucleomycea   | Fungi               | Incertae_Sedis       | Candida              |
| 299 | ASV96  | 0 | 3B_8  | Eukaryota | Opisthokonta | Nucleomycea   | Fungi               | Incertae_Sedis       | Candida              |
| 300 | ASV96  | 0 | 3W_11 | Eukaryota | Opisthokonta | Nucleomycea   | Fungi               | Incertae_Sedis       | Candida              |

ASVs are ranked in decreasing order of abundance. 0: abundance values less than 10e-5.
